# Supplementary material for: Comprehensive bioinformatic analysis of the expression and prognostic significance of TSC22D domain family genes in acute myeloid leukemia
Source: Research Square preprint supplement (doi:10.21203/rs.3.rs-1209284/v1), 2022-01-14
Supplement: Supplementary file 1 [file 04a62b1c41753bc7e1da9fe9.xlsx]

## Sheet: Predicted TSC22D3 KEA
Gene	target	Z-score
TSC22D3	TGFBR2	4.09743
TSC22D3	MAP4K1	3.17059
TSC22D3	RIPK4	3.05255
TSC22D3	MAP2K2	2.71747
TSC22D3	TIE1	2.70575
TSC22D3	MAP2K3	2.40011
TSC22D3	TEC	2.08124
TSC22D3	TXK	1.96656
TSC22D3	TYK2	1.9333
TSC22D3	EPHB1	1.9294
TSC22D3	FGFR4	1.83781
TSC22D3	ITK	1.75499
TSC22D3	BTK	1.71194
TSC22D3	BCKDK	1.70686
TSC22D3	ERN1	1.65429
TSC22D3	TESK2	1.63658
TSC22D3	GRK7	1.61193
TSC22D3	ZAP70	1.58559
TSC22D3	KIT	1.58196
TSC22D3	STK10	1.54164
TSC22D3	MYLK	1.51357
TSC22D3	CSF1R	1.49802
TSC22D3	MAPK12	1.49195
TSC22D3	BLK	1.45803
TSC22D3	BMPR2	1.45579
TSC22D3	IKBKE	1.40916
TSC22D3	JAK3	1.39518
TSC22D3	JAK1	1.36501
TSC22D3	SIK3	1.35746
TSC22D3	MAP3K14	1.33779
TSC22D3	MAP3K3	1.33286
TSC22D3	MUSK	1.32807
TSC22D3	NLK	1.25683
TSC22D3	TBK1	1.24107
TSC22D3	PIK3CG	1.2336
TSC22D3	MST4	1.20052
TSC22D3	CSK	1.17729
TSC22D3	OBSCN	1.16778
TSC22D3	GRK6	1.16729
TSC22D3	PHKG1	1.16359
TSC22D3	PHKG2	1.16359
TSC22D3	MAP3K12	1.15686
TSC22D3	TTN	1.15243
TSC22D3	MAPK15	1.11099
TSC22D3	STK24	1.08966
TSC22D3	MARK3	1.08809
TSC22D3	TNK2	1.08158
TSC22D3	PIM1	1.07332
TSC22D3	SYK	1.069
TSC22D3	STK39	1.06833
TSC22D3	MAP3K13	1.06823
TSC22D3	TLK1	1.04781
TSC22D3	FGFR3	1.02201
TSC22D3	TRPM7	1.01559
TSC22D3	KDR	0.987285
TSC22D3	CAMK1D	0.986599
TSC22D3	IKBKB	0.978207
TSC22D3	MAPK7	0.975815
TSC22D3	LCK	0.972753
TSC22D3	LMTK2	0.96382
TSC22D3	IRAK1	0.9378
TSC22D3	HCK	0.937707
TSC22D3	GRK1	0.934391
TSC22D3	FGFR2	0.914486
TSC22D3	CLK1	0.911754
TSC22D3	OXSR1	0.911429
TSC22D3	IRAK4	0.908425
TSC22D3	NEK9	0.892309
TSC22D3	PRPF4B	0.891537
TSC22D3	LRRK2	0.885594
TSC22D3	MAPKAPK5	0.880656
TSC22D3	PRKG2	0.869803
TSC22D3	INSRR	0.868592
TSC22D3	MAP2K6	0.863566
TSC22D3	SIK2	0.844952
TSC22D3	MAPK4	0.833753
TSC22D3	MAP3K7	0.8297
TSC22D3	PIK3CA	0.813964
TSC22D3	CAMKK2	0.796236
TSC22D3	CAMK1G	0.786433
TSC22D3	PDK1	0.78477
TSC22D3	PRKCH	0.754331
TSC22D3	FES	0.750812
TSC22D3	PRKCQ	0.750476
TSC22D3	JAK2	0.743021
TSC22D3	TAOK3	0.739358
TSC22D3	TGFBR1	0.736879
TSC22D3	CAMKK1	0.722795
TSC22D3	TRIB3	0.715912
TSC22D3	SIK1	0.694947
TSC22D3	SGK3	0.67001
TSC22D3	MOS	0.655818
TSC22D3	PRKAA2	0.637791
TSC22D3	CDK19	0.629176
TSC22D3	EPHA3	0.626204
TSC22D3	IGF1R	0.618583
TSC22D3	RPS6KA6	0.612147
TSC22D3	RPS6KC1	0.611513
TSC22D3	RPS6KL1	0.611513
TSC22D3	LYN	0.599859
TSC22D3	IRAK3	0.595482
TSC22D3	CDK4	0.594229
TSC22D3	PDPK1	0.59303
TSC22D3	MATK	0.592633
TSC22D3	MAP3K11	0.579949
TSC22D3	PDK2	0.579609
TSC22D3	PRKD1	0.576611
TSC22D3	SGK223	0.572748
TSC22D3	SGK494	0.572748
TSC22D3	FLT3	0.552555
TSC22D3	CHUK	0.534698
TSC22D3	PKN1	0.532104
TSC22D3	RPS6KA2	0.529288
TSC22D3	GRK5	0.51036
TSC22D3	MAPK11	0.507956
TSC22D3	MAP2K4	0.50781
TSC22D3	HIPK2	0.505287
TSC22D3	MAP3K1	0.499219
TSC22D3	FYN	0.497211
TSC22D3	WNK1	0.495805
TSC22D3	SGK2	0.495486
TSC22D3	ARAF	0.452419
TSC22D3	ZAK	0.451777
TSC22D3	PRKD2	0.441132
TSC22D3	MAP2K1	0.439404
TSC22D3	MAPK3	0.438748
TSC22D3	PASK	0.428589
TSC22D3	MAPKAPK2	0.428204
TSC22D3	FGR	0.421927
TSC22D3	MARK2	0.41164
TSC22D3	MAP4K2	0.407818
TSC22D3	ABL1	0.405181
TSC22D3	MAPKAPK3	0.397121
TSC22D3	PINK1	0.395775
TSC22D3	PTK2B	0.359077
TSC22D3	ADRBK2	0.324124
TSC22D3	RPS6KA1	0.321478
TSC22D3	PRKCD	0.320881
TSC22D3	EIF2AK2	0.296216
TSC22D3	DAPK2	0.267211
TSC22D3	IRAK2	0.25738
