# Supplementary material for: Comprehensive bioinformatic analysis of the expression and prognostic significance of TSC22D domain family genes in acute myeloid leukemia
Source: Research Square preprint supplement (doi:10.21203/rs.3.rs-1209284/v1), 2022-01-14
Supplement: Supplementary file 2 [file 07a4b50e65429ef8d2b3181e.xlsx]

## Sheet: TSC22D3 DO
# [DO term]	[Term ID]	[# of overlapped genes]	[P value]	[FDR]
Endometriosis of uterus	DOID:288	2	1.84317e-05	5.07021e-06
Carcinoma in situ	DOID:8719	2	2.06693e-05	5.79396e-06
Congenital Abnormality	DOID:759	3	3.67002e-05	1.14681e-05
Neuroendocrine Tumors	DOID:169	2	3.87582e-05	1.22072e-05
Neoplasm, Thyroid	DOID:1781	2	5.07287e-05	1.6929e-05
Papillary thyroid carcinoma	DOID:3969	2	6.78629e-05	2.39107e-05
Retinoblastoma	DOID:768	2	7.51902e-05	2.70388e-05
Colorectal Neoplasms	DOID:1985	2	7.51902e-05	2.70388e-05
Epithelial ovarian cancer	DOID:4001	2	9.42941e-05	3.56968e-05
Cervix carcinoma	DOID:2893	2	9.81665e-05	3.75719e-05
Thyroid carcinoma	DOID:3963	2	0.000102101	3.94948e-05
Myeloid leukemia, chronic	DOID:8552	2	0.000114874	4.555e-05
Unspecified myeloid leukemia	DOID:8692	2	0.000137137	5.65967e-05
Malignant neoplasm of mouth, unspecified	DOID:8894	2	0.000142	5.89491e-05
Meningioma	DOID:3565	2	0.000146259	6.13491e-05
Carcinoma of Nasopharynx	DOID:9261	2	0.000160162	6.8835e-05
Malignant neoplasm of prostate	DOID:10283	3	0.000298236	0.000147466
Primary Tumor	DOID:8176	2	0.000310975	0.000155439
Cervical Squamous Cell Carcinoma	DOID:3744	2	0.000310975	0.000155439
Small cell carcinoma of lung	DOID:5409	2	0.000317298	0.000159309
Malignant neoplasm of esophagus	DOID:1104	2	0.000323506	0.000163227
Adenoma	DOID:657	2	0.000342946	0.000175262
Esophageal Neoplasms	DOID:5041	2	0.000356216	0.000183522
Malignant neoplasm of urinary bladder	DOID:11054	2	0.000416225	0.000223019
Squamous Cell Carcinoma of Esophagus	DOID:3748	2	0.000430855	0.000232314
Stomach Carcinoma	DOID:5517	2	0.000459779	0.000251467
Metastasis to Lymph Nodes	DOID:10437	2	0.000466637	0.000256372
Glioblastoma	DOID:3068	2	0.000474397	0.000261324
Breast Carcinoma	DOID:3459	2	0.00064613	0.000382111
Renal Cell Carcinoma	DOID:4450	2	0.000979807	0.000636005
Malignant Glioma	DOID:3070	2	0.000979807	0.000636005
Carcinoma	DOID:305	2	0.000979807	0.000636005
cancer	DOID:162	3	0.00101018	0.000659408
Adenocarcinoma	DOID:299	2	0.00105905	0.000699215
Glioma	DOID:2627	2	0.00125715	0.000861109
Malignant neoplasm of ovary	DOID:2144	2	0.00140016	0.000981385
Squamous cell carcinoma	DOID:1749	2	0.00168031	0.00122361
Leukemia	DOID:1240	2	0.00190466	0.00142236
Malignant neoplasm of lung	DOID:1324	2	0.00202434	0.0015272
Malignant neoplasm of stomach	DOID:10534	2	0.00202434	0.0015272
Melanoma	DOID:1909	2	0.00239735	0.00186345
Carcinoma of the Large Intestine	DOID:1994	2	0.00267885	0.00211949
Primary carcinoma of the liver cells	DOID:684	2	0.00284493	0.00227502
Neoplasm Metastasis	DOID:2619	2	0.0035431	0.00293394
Embryoma	DOID:4766	2	0.00799367	0.00728578
Malignant neoplasm of breast	DOID:4241	2	0.0102242	0.0095067
Malignant Neoplasms	DOID:462	2	0.0158115	0.0151086
disease	DOID:4	3	0.018167	0.0174814

## Sheet: TSC22D3 GO
# [KEGG term]	[Term ID]	[# of overlapped genes]	[P value]	[FDR]
response to DNA damage stimulus	GO:0006974	4	2.19986e-07	6.13243e-09
tissue development	GO:0009888	3	9.33445e-07	3.53003e-08
G1 phase of mitotic cell cycle	GO:0000080	3	1.53068e-06	6.50087e-08
regulation of sequence-specific DNA binding transcription factor activity	GO:0051090	3	5.54126e-06	3.10114e-07
phosphatidylinositol-mediated signaling	GO:0048015	3	7.59789e-06	4.59923e-07
pattern specification process	GO:0007389	3	1.0699e-05	7.00198e-07
fibroblast growth factor receptor signaling pathway	GO:0008543	3	2.279e-05	1.8876e-06
embryo development	GO:0009790	3	2.45612e-05	2.08729e-06
epidermal growth factor receptor signaling pathway	GO:0007173	3	2.86232e-05	2.52779e-06
insulin receptor signaling pathway	GO:0008286	3	3.32338e-05	3.09259e-06
organ development	GO:0048513	2	3.84258e-05	3.76718e-06
nerve growth factor receptor signaling pathway	GO:0048011	3	8.83368e-05	1.14681e-05
response to corticosterone stimulus	GO:0051412	2	9.26711e-05	1.22072e-05
response to organic nitrogen	GO:0010243	2	0.000152112	2.39107e-05
organ regeneration	GO:0031100	2	0.000290022	5.89491e-05
positive regulation of transcription from RNA polymerase II promoter	GO:0045944	3	0.000707853	0.000212116
regulation of cell proliferation	GO:0042127	2	0.000711138	0.000213913
response to organic cyclic compound	GO:0014070	2	0.000788665	0.000246608
S phase of mitotic cell cycle	GO:0000084	2	0.000901286	0.000297302
cell cycle arrest	GO:0007050	2	0.00111773	0.000400331
G1/S transition of mitotic cell cycle	GO:0000082	2	0.00130964	0.000497707
response to drug	GO:0042493	2	0.00352408	0.00188965
mitotic cell cycle	GO:0000278	2	0.00416811	0.00236211
negative regulation of cell proliferation	GO:0008285	2	0.004487	0.00260204
cell cycle	GO:0007049	2	0.00669962	0.0043138
positive regulation of transcription, DNA-dependent	GO:0045893	2	0.00750992	0.00498247

## Sheet: TSC22D3  KEGG Human
# [KEGG term]	[Term ID]	[# of overlapped genes]	[P value]	[FDR]
FoxO signaling pathway	hsa04068	5	2.62203e-10	1.19592e-11
Prostate cancer	hsa05215	3	5.47478e-06	8.32529e-07
AMPK signaling pathway	hsa04152	3	1.26674e-05	2.24593e-06
Bladder cancer	hsa05219	2	0.000148018	4.14654e-05
PI3K-Akt signaling pathway	hsa04151	3	0.000165918	4.75856e-05
Endometrial cancer	hsa05213	2	0.000220456	6.62921e-05
Pathways in cancer	hsa05200	3	0.000236968	7.22277e-05
Non-small cell lung cancer	hsa05223	2	0.000249388	7.67493e-05
Glioma	hsa05214	2	0.000316653	0.000103058
p53 signaling pathway	hsa04115	2	0.000341035	0.000112682
Melanoma	hsa05218	2	0.000364127	0.000122733
Prolactin signaling pathway	hsa04917	2	0.000371389	0.000126178
Chronic myeloid leukemia	hsa05220	2	0.000379964	0.00012967
Thyroid hormone signaling pathway	hsa04919	2	0.000804976	0.000335573
Cell cycle	hsa04110	2	0.000866433	0.000370197
Hepatitis B	hsa05161	2	0.00112352	0.000511479
Jak-STAT signaling pathway	hsa04630	2	0.00127234	0.000597995
Oxytocin signaling pathway	hsa04921	2	0.00127234	0.000597995
Transcriptional misregulation in cancer	hsa05202	2	0.00155141	0.000765365
Proteoglycans in cancer	hsa05205	2	0.00189493	0.000981385
Viral carcinogenesis	hsa05203	2	0.00192243	0.00100057
HTLV-I infection	hsa05166	2	0.00276085	0.00157496
MicroRNAs in cancer	hsa05206	2	0.00346075	0.002078
