# Supplementary material for: Comprehensive bioinformatic analysis of the expression and prognostic significance of TSC22D domain family genes in acute myeloid leukemia
Source: Research Square preprint supplement (doi:10.21203/rs.3.rs-1209284/v1), 2022-01-14
Supplement: Supplementary file 3 [file 56269fa03eefe871a7ec27e0.xlsx]

## Sheet: harmonizome database
gene	target gene
TSC22D3	CASP8
TSC22D3	DCLK2
TSC22D3	ELAVL1
TSC22D3	FOS
TSC22D3	HDAC1
TSC22D3	HDAC2
TSC22D3	HPCAL4
TSC22D3	JUN
TSC22D3	MTA2
TSC22D3	MYOD1
TSC22D3	NEDD4L
TSC22D3	NFKB1
TSC22D3	NFKB2
TSC22D3	PCK1
TSC22D3	PLEKHF2
TSC22D3	RAF1
TSC22D3	RELA
TSC22D3	SCNN1A
TSC22D3	SCNN1B
TSC22D3	SCNN1D
TSC22D3	Symbol
TSC22D3	SCNN1G
TSC22D3	SGK1
TSC22D3	SUMO1
TSC22D3	TSC22D1
TSC22D3	UBC
TSC22D3	UBE2I
