# Supplementary material for: Comprehensive bioinformatic analysis of the expression and prognostic significance of TSC22D domain family genes in acute myeloid leukemia
Source: Research Square preprint supplement (doi:10.21203/rs.3.rs-1209284/v1), 2022-01-14
Supplement: Supplementary file 4 [file 715475c49700465786f17b81.xlsx]

## Sheet: TSC22D1ExpressioninAMLcelllines
Depmap ID	Expression 21Q3 Public	Cell Line Name	Primary Disease	Lineage	Lineage Subtype
ACH-000002	1.5656	HL60	Leukemia	Blood	AML
ACH-000004	5.55152	HEL	Leukemia	Blood	AML
ACH-000005	6.18587	HEL9217	Leukemia	Blood	AML
ACH-000006	3.21257	MONOMAC6	Leukemia	Blood	AML
ACH-000034	1.91456	PLB985	Leukemia	Blood	AML
ACH-000045	1.10434	MV411	Leukemia	Blood	AML
ACH-000065	3.63923	OCIAML5	Leukemia	Blood	AML
ACH-000080	0.807355	BDCM	Leukemia	Blood	AML
ACH-000081	5.69432	GDM1	Leukemia	Blood	AML
ACH-000084	5.33557	MUTZ3	Leukemia	Blood	AML
ACH-000112	3.01792	SIGM5	Leukemia	Blood	AML
ACH-000113	3.62994	OCIAML2	Leukemia	Blood	AML
ACH-000146	4.15704	THP1	Leukemia	Blood	AML
ACH-000166	4.96162	KASUMI6	Leukemia	Blood	AML
ACH-000168	2.7845	NOMO1	Leukemia	Blood	AML
ACH-000195	4.97774	SET2	Leukemia	Blood	AML
ACH-000198	1.1177	EOL1	Leukemia	Blood	AML
ACH-000218	4.20477	PL21	Leukemia	Blood	AML
ACH-000263	4.65306	KASUMI1	Leukemia	Blood	AML
ACH-000294	3.15056	NB4	Leukemia	Blood	AML
ACH-000299	4.70764	HNT34	Leukemia	Blood	AML
ACH-000336	0.378512	OCIAML3	Leukemia	Blood	AML
ACH-000362	2.88947	MOLM13	Leukemia	Blood	AML
ACH-000369	4.70764	MOLM16	Leukemia	Blood	AML
ACH-000373	4.14405	SKM1	Leukemia	Blood	AML
ACH-000386	5.13175	KG1	Leukemia	Blood	AML
ACH-000387	5.51979	TF1	Leukemia	Blood	AML
ACH-000406	3.53854	U937	Leukemia	Blood	AML
ACH-000439	4.68874	ME1	Leukemia	Blood	AML
ACH-000487	5.33163	F36P	Leukemia	Blood	AML
ACH-000498	4.84348	KO52	Leukemia	Blood	AML
ACH-000557	4.39369	AML193	Leukemia	Blood	AML
ACH-000602	5.44062	M07E	Leukemia	Blood	AML
ACH-000641	3.69599	CMK	Leukemia	Blood	AML
ACH-000751	6.95803	OCIM1	Leukemia	Blood	AML
ACH-000770	5.67044	P31FUJ	Leukemia	Blood	AML
ACH-001036	4.27426	CMK115	Leukemia	Blood	AML
ACH-001129	4.01078	MONOMAC1	Leukemia	Blood	AML
ACH-001574	1.87184	MOLM14	Leukemia	Blood	AML
ACH-001577	4.77716	MUTZ8	Leukemia	Blood	AML
ACH-001613	4.29352	OCIAML4	Leukemia	Blood	AML
ACH-001618	5.5373	OCIM2	Leukemia	Blood	AML
ACH-001647	2.98003	SHI1	Leukemia	Blood	AML
ACH-001656	4.45812	SKNO1	Leukemia	Blood	AML

## Sheet: TSC22D2ExpressioninAMLcelllines
Depmap ID	Expression 21Q3 Public	Cell Line Name	Primary Disease	Lineage	Lineage Subtype
ACH-000002	2.28983	HL60	Leukemia	Blood	AML
ACH-000004	2.87184	HEL	Leukemia	Blood	AML
ACH-000005	3.6792	HEL9217	Leukemia	Blood	AML
ACH-000006	3.3799	MONOMAC6	Leukemia	Blood	AML
ACH-000034	2.41954	PLB985	Leukemia	Blood	AML
ACH-000045	2.24184	MV411	Leukemia	Blood	AML
ACH-000065	2.86394	OCIAML5	Leukemia	Blood	AML
ACH-000080	2.80529	BDCM	Leukemia	Blood	AML
ACH-000081	2.72901	GDM1	Leukemia	Blood	AML
ACH-000084	3.93923	MUTZ3	Leukemia	Blood	AML
ACH-000112	2.73552	SIGM5	Leukemia	Blood	AML
ACH-000113	2.49825	OCIAML2	Leukemia	Blood	AML
ACH-000146	3.0072	THP1	Leukemia	Blood	AML
ACH-000166	3.39643	KASUMI6	Leukemia	Blood	AML
ACH-000168	2.86987	NOMO1	Leukemia	Blood	AML
ACH-000195	3.10266	SET2	Leukemia	Blood	AML
ACH-000198	2.58496	EOL1	Leukemia	Blood	AML
ACH-000218	3.60999	PL21	Leukemia	Blood	AML
ACH-000263	2.81967	KASUMI1	Leukemia	Blood	AML
ACH-000294	2.45681	NB4	Leukemia	Blood	AML
ACH-000299	2.55827	HNT34	Leukemia	Blood	AML
ACH-000336	2.17951	OCIAML3	Leukemia	Blood	AML
ACH-000362	2.37851	MOLM13	Leukemia	Blood	AML
ACH-000369	3.07039	MOLM16	Leukemia	Blood	AML
ACH-000373	2.91648	SKM1	Leukemia	Blood	AML
ACH-000386	3.59216	KG1	Leukemia	Blood	AML
ACH-000387	2.6893	TF1	Leukemia	Blood	AML
ACH-000406	2.70708	U937	Leukemia	Blood	AML
ACH-000439	1.92979	ME1	Leukemia	Blood	AML
ACH-000487	3.46728	F36P	Leukemia	Blood	AML
ACH-000498	2.92029	KO52	Leukemia	Blood	AML
ACH-000557	3.774	AML193	Leukemia	Blood	AML
ACH-000602	3.80941	M07E	Leukemia	Blood	AML
ACH-000641	2.86394	CMK	Leukemia	Blood	AML
ACH-000751	2.74846	OCIM1	Leukemia	Blood	AML
ACH-000770	3.51602	P31FUJ	Leukemia	Blood	AML
ACH-001036	2.80116	CMK115	Leukemia	Blood	AML
ACH-001129	3.45022	MONOMAC1	Leukemia	Blood	AML
ACH-001574	2.7845	MOLM14	Leukemia	Blood	AML
ACH-001577	2.46205	MUTZ8	Leukemia	Blood	AML
ACH-001613	5.60377	OCIAML4	Leukemia	Blood	AML
ACH-001618	3.04614	OCIM2	Leukemia	Blood	AML
ACH-001647	2.71149	SHI1	Leukemia	Blood	AML
ACH-001656	2.23573	SKNO1	Leukemia	Blood	AML

## Sheet: TSC22D3ExpressioninAMLcelllines
Depmap ID	Expression 21Q3 Public	Cell Line Name	Primary Disease	Lineage	Lineage Subtype
ACH-000002	3.26903	HL60	Leukemia	Blood	AML
ACH-000004	5.23879	HEL	Leukemia	Blood	AML
ACH-000005	3.6241	HEL9217	Leukemia	Blood	AML
ACH-000006	6.10077	MONOMAC6	Leukemia	Blood	AML
ACH-000034	7.16972	PLB985	Leukemia	Blood	AML
ACH-000045	4.21801	MV411	Leukemia	Blood	AML
ACH-000065	4.22265	OCIAML5	Leukemia	Blood	AML
ACH-000080	4.61589	BDCM	Leukemia	Blood	AML
ACH-000081	4.19219	GDM1	Leukemia	Blood	AML
ACH-000084	3.14241	MUTZ3	Leukemia	Blood	AML
ACH-000112	6.88594	SIGM5	Leukemia	Blood	AML
ACH-000113	3.94017	OCIAML2	Leukemia	Blood	AML
ACH-000146	3.96347	THP1	Leukemia	Blood	AML
ACH-000166	1.66448	KASUMI6	Leukemia	Blood	AML
ACH-000168	3.51728	NOMO1	Leukemia	Blood	AML
ACH-000195	3.32769	SET2	Leukemia	Blood	AML
ACH-000198	4.52982	EOL1	Leukemia	Blood	AML
ACH-000218	5.84122	PL21	Leukemia	Blood	AML
ACH-000263	3.60051	KASUMI1	Leukemia	Blood	AML
ACH-000294	4.76182	NB4	Leukemia	Blood	AML
ACH-000299	5.80323	HNT34	Leukemia	Blood	AML
ACH-000336	5.08151	OCIAML3	Leukemia	Blood	AML
ACH-000362	5.52074	MOLM13	Leukemia	Blood	AML
ACH-000369	0.731183	MOLM16	Leukemia	Blood	AML
ACH-000373	4.70543	SKM1	Leukemia	Blood	AML
ACH-000386	3.28836	KG1	Leukemia	Blood	AML
ACH-000387	0.584963	TF1	Leukemia	Blood	AML
ACH-000406	6.34536	U937	Leukemia	Blood	AML
ACH-000439	1.98185	ME1	Leukemia	Blood	AML
ACH-000487	1.87578	F36P	Leukemia	Blood	AML
ACH-000498	3.19692	KO52	Leukemia	Blood	AML
ACH-000557	5.51412	AML193	Leukemia	Blood	AML
ACH-000602	2.28096	M07E	Leukemia	Blood	AML
ACH-000641	3.92884	CMK	Leukemia	Blood	AML
ACH-000751	5.62585	OCIM1	Leukemia	Blood	AML
ACH-000770	7.12309	P31FUJ	Leukemia	Blood	AML
ACH-001036	2.22959	CMK115	Leukemia	Blood	AML
ACH-001129	5.79468	MONOMAC1	Leukemia	Blood	AML
ACH-001574	4.78607	MOLM14	Leukemia	Blood	AML
ACH-001577	4.06437	MUTZ8	Leukemia	Blood	AML
ACH-001613	4.51665	OCIAML4	Leukemia	Blood	AML
ACH-001618	0	OCIM2	Leukemia	Blood	AML
ACH-001647	4.93452	SHI1	Leukemia	Blood	AML
ACH-001656	4.16511	SKNO1	Leukemia	Blood	AML

## Sheet: TSC22D4ExpressioninAMLcelllines
Depmap ID	Expression 21Q3 Public	Cell Line Name	Primary Disease	Lineage	Lineage Subtype
ACH-000002	5.14037	HL60	Leukemia	Blood	AML
ACH-000004	5.15462	HEL	Leukemia	Blood	AML
ACH-000005	4.85798	HEL9217	Leukemia	Blood	AML
ACH-000006	5.49217	MONOMAC6	Leukemia	Blood	AML
ACH-000034	5.25248	PLB985	Leukemia	Blood	AML
ACH-000045	5.3147	MV411	Leukemia	Blood	AML
ACH-000065	5.56163	OCIAML5	Leukemia	Blood	AML
ACH-000080	5.46238	BDCM	Leukemia	Blood	AML
ACH-000081	5.85125	GDM1	Leukemia	Blood	AML
ACH-000084	6.30323	MUTZ3	Leukemia	Blood	AML
ACH-000112	5.22072	SIGM5	Leukemia	Blood	AML
ACH-000113	5.22033	OCIAML2	Leukemia	Blood	AML
ACH-000146	5.70044	THP1	Leukemia	Blood	AML
ACH-000166	5.87725	KASUMI6	Leukemia	Blood	AML
ACH-000168	5.79727	NOMO1	Leukemia	Blood	AML
ACH-000195	5.49506	SET2	Leukemia	Blood	AML
ACH-000198	5.61706	EOL1	Leukemia	Blood	AML
ACH-000218	6.25569	PL21	Leukemia	Blood	AML
ACH-000263	5.58346	KASUMI1	Leukemia	Blood	AML
ACH-000294	6.31922	NB4	Leukemia	Blood	AML
ACH-000299	5.5598	HNT34	Leukemia	Blood	AML
ACH-000336	6.60377	OCIAML3	Leukemia	Blood	AML
ACH-000362	5.11437	MOLM13	Leukemia	Blood	AML
ACH-000369	5.79233	MOLM16	Leukemia	Blood	AML
ACH-000373	5.71973	SKM1	Leukemia	Blood	AML
ACH-000386	5.01078	KG1	Leukemia	Blood	AML
ACH-000387	5.28688	TF1	Leukemia	Blood	AML
ACH-000406	6.23132	U937	Leukemia	Blood	AML
ACH-000439	5.68145	ME1	Leukemia	Blood	AML
ACH-000487	5.8009	F36P	Leukemia	Blood	AML
ACH-000498	4.60288	KO52	Leukemia	Blood	AML
ACH-000557	6.81121	AML193	Leukemia	Blood	AML
ACH-000602	5.83188	M07E	Leukemia	Blood	AML
ACH-000641	6.36212	CMK	Leukemia	Blood	AML
ACH-000751	5.99548	OCIM1	Leukemia	Blood	AML
ACH-000770	6.76155	P31FUJ	Leukemia	Blood	AML
ACH-001036	5.35509	CMK115	Leukemia	Blood	AML
ACH-001129	5.64818	MONOMAC1	Leukemia	Blood	AML
ACH-001574	4.88264	MOLM14	Leukemia	Blood	AML
ACH-001577	5.38336	MUTZ8	Leukemia	Blood	AML
ACH-001613	3.73985	OCIAML4	Leukemia	Blood	AML
ACH-001618	4.26754	OCIM2	Leukemia	Blood	AML
ACH-001647	3.90785	SHI1	Leukemia	Blood	AML
ACH-001656	6.11437	SKNO1	Leukemia	Blood	AML
