# Supplementary material for: Comprehensive bioinformatic analysis of the expression and prognostic significance of TSC22D domain family genes in acute myeloid leukemia
Source: Research Square preprint supplement (doi:10.21203/rs.3.rs-1209284/v1), 2022-01-14
Supplement: Supplementary file 5 [file 72664a076bc83b1a7657691c.xlsx]

## Sheet: TSC22D1 expression
TSC22D1 (log2)	215111_s_at
AML normal karyotype.	8.9635
AML normal karyotype.	9.04766
AML normal karyotype.	6.94351
AML normal karyotype.	9.93446
AML normal karyotype.	9.46437
AML normal karyotype.	9.77147
AML normal karyotype.	8.43667
AML normal karyotype.	8.15761
AML normal karyotype.	10.1056
AML normal karyotype.	7.62447
AML normal karyotype.	9.79462
AML normal karyotype.	7.70944
AML normal karyotype.	6.25506
AML normal karyotype.	10.0533
AML normal karyotype.	10.0105
AML normal karyotype.	7.11021
AML normal karyotype.	10.1455
AML normal karyotype.	9.19512
AML normal karyotype.	10.1762
AML normal karyotype.	9.37933
AML normal karyotype.	6.34569
AML normal karyotype.	5.13329
AML normal karyotype.	7.19656
AML normal karyotype.	10.2848
AML normal karyotype.	8.08314
AML normal karyotype.	10.0877
AML normal karyotype.	9.2372
AML normal karyotype.	10.1466
AML normal karyotype.	9.40364
AML normal karyotype.	8.04926
AML normal karyotype.	9.39039
AML normal karyotype.	9.81799
AML normal karyotype.	9.44752
AML normal karyotype.	10.7448
AML normal karyotype.	10.6268
AML normal karyotype.	10.1568
AML normal karyotype.	10.2414
AML normal karyotype.	8.02736
AML normal karyotype.	9.7928
AML normal karyotype.	9.94616
AML normal karyotype.	8.15301
AML normal karyotype.	7.13195
AML normal karyotype.	7.06003
AML normal karyotype.	8.79788
AML normal karyotype.	9.78129
AML normal karyotype.	8.33958
AML normal karyotype.	6.02777
AML normal karyotype.	9.92047
AML normal karyotype.	9.38265
AML normal karyotype.	7.87301
AML normal karyotype.	10.7111
AML normal karyotype.	8.45004
AML normal karyotype.	8.96619
AML normal karyotype.	5.88853
AML normal karyotype.	9.84302
AML normal karyotype.	7.59915
AML normal karyotype.	9.48508
AML normal karyotype.	8.89349
AML normal karyotype.	10.6964
AML normal karyotype.	5.40393
AML normal karyotype.	9.33842
AML normal karyotype.	6.45937
AML normal karyotype.	10.6795
AML normal karyotype.	8.75498
AML normal karyotype.	9.04156
AML normal karyotype.	6.46351
AML normal karyotype.	5.49267
AML normal karyotype.	11.1551
AML normal karyotype.	11.6425
AML normal karyotype.	7.07057
AML normal karyotype.	10.7709
AML normal karyotype.	7.65667
AML normal karyotype.	7.22515
AML normal karyotype.	9.76302
AML normal karyotype.	10.745
AML normal karyotype.	8.2107
AML normal karyotype.	9.91018
AML normal karyotype.	7.27464
AML normal karyotype.	9.64405
AML normal karyotype.	9.53516
AML normal karyotype.	8.15138
AML normal karyotype.	10.9293
AML normal karyotype.	9.7975
AML normal karyotype.	10.7697
AML normal karyotype.	10.1284
AML normal karyotype.	8.53175
AML normal karyotype.	10.1523
AML normal karyotype.	9.1906
AML normal karyotype.	9.65814
AML normal karyotype.	6.76345
AML normal karyotype.	8.93655
AML normal karyotype.	9.21746
AML normal karyotype.	10.2957
AML normal karyotype.	5.54154
AML normal karyotype.	8.6407
AML normal karyotype.	5.33041
AML normal karyotype.	9.86399
AML normal karyotype.	9.72644
AML normal karyotype.	6.76314
AML normal karyotype.	10.686
AML normal karyotype.	8.14952
AML normal karyotype.	9.98545
AML normal karyotype.	11.2516
AML normal karyotype.	10.3383
AML normal karyotype.	9.98103
AML normal karyotype.	6.55938
AML normal karyotype.	6.09442
AML normal karyotype.	7.29929
AML normal karyotype.	9.84534
AML normal karyotype.	10.3687
AML normal karyotype.	8.88199
AML normal karyotype.	8.41401
AML normal karyotype.	9.35686
AML normal karyotype.	10.456
AML normal karyotype.	9.18289
AML normal karyotype.	7.26722
AML normal karyotype.	10.0645
AML normal karyotype.	8.94576
AML normal karyotype.	8.28495
AML normal karyotype.	8.94714
AML normal karyotype.	9.93183
AML normal karyotype.	10.2199
AML normal karyotype.	8.59519
AML normal karyotype.	9.23453
AML normal karyotype.	8.78395
AML normal karyotype.	7.36883
AML normal karyotype.	8.62639
AML normal karyotype.	9.18302
AML normal karyotype.	10.2985
AML normal karyotype.	7.10098
AML normal karyotype.	8.78958
AML normal karyotype.	9.55478
AML normal karyotype.	7.73537
AML normal karyotype.	9.76926
AML normal karyotype.	9.25949
AML normal karyotype.	9.10331
AML normal karyotype.	11.1762
AML normal karyotype.	6.52962
AML normal karyotype.	7.43108
AML normal karyotype.	11.1497
AML normal karyotype.	7.87036
AML normal karyotype.	8.95842
AML normal karyotype.	9.58888
AML normal karyotype.	7.84614
AML normal karyotype.	10.3094
AML normal karyotype.	8.76654
AML normal karyotype.	9.6263
AML normal karyotype.	8.50268
AML normal karyotype.	8.94796
AML normal karyotype.	7.7028
AML normal karyotype.	8.85243
AML normal karyotype.	8.22139
AML normal karyotype.	9.40937
AML normal karyotype.	8.43215
AML normal karyotype.	7.22895
AML normal karyotype.	10.0455
AML normal karyotype.	8.93777
AML normal karyotype.	8.41841
AML normal karyotype.	10.6212
AML normal karyotype.	10.2358
AML normal karyotype.	7.71991
AML normal karyotype.	9.2614
AML normal karyotype.	8.73653
AML normal karyotype.	8.92428
AML normal karyotype.	10.1352
AML normal karyotype.	5.88588
AML normal karyotype.	9.4578
AML normal karyotype.	8.63877
AML normal karyotype.	8.12415
AML normal karyotype.	10.1643
AML normal karyotype.	8.38753
AML normal karyotype.	9.82574
AML normal karyotype.	7.65375
AML normal karyotype.	9.22432
AML normal karyotype.	11.3637
AML normal karyotype.	9.46666
AML normal karyotype.	8.41533
AML normal karyotype.	7.97097
AML normal karyotype.	9.25305
AML normal karyotype.	9.07579
AML normal karyotype.	10.5303
AML normal karyotype.	8.77361
AML normal karyotype.	6.76586
AML normal karyotype.	10.6318
AML normal karyotype.	9.25903
AML normal karyotype.	7.69606
AML normal karyotype.	7.7518
AML normal karyotype.	8.06119
AML normal karyotype.	10.5714
AML normal karyotype.	7.75197
AML normal karyotype.	11.1095
AML normal karyotype.	10.4476
AML normal karyotype.	10.2253
AML normal karyotype.	10.1496
AML normal karyotype.	5.57548
AML normal karyotype.	9.30942
AML normal karyotype.	9.968
AML normal karyotype.	9.68147
AML normal karyotype.	6.45932
AML normal karyotype.	9.72955
AML normal karyotype.	9.20675
AML normal karyotype.	8.77445
AML normal karyotype.	9.781
AML normal karyotype.	9.79941
AML normal karyotype.	10.6435
AML normal karyotype.	8.61232
AML normal karyotype.	8.12946
AML normal karyotype.	9.14102
AML normal karyotype.	10.1719
AML normal karyotype.	10.1529
AML normal karyotype.	8.35122
AML normal karyotype.	11.1134
AML normal karyotype.	7.0738
AML normal karyotype.	8.00686
AML normal karyotype.	10.6584
AML normal karyotype.	7.1054
AML normal karyotype.	9.71589
AML normal karyotype.	10.7388
AML normal karyotype.	9.08082
AML normal karyotype.	8.50233
AML normal karyotype.	10.5485
AML normal karyotype.	7.37522
AML normal karyotype.	9.79671
AML normal karyotype.	8.99259
AML normal karyotype.	9.86003
AML normal karyotype.	9.81823
AML normal karyotype.	6.85802
AML normal karyotype.	10.252
AML normal karyotype.	7.00854
AML normal karyotype.	9.17369
AML normal karyotype.	10.0704
AML normal karyotype.	9.50521
AML normal karyotype.	9.39137
AML normal karyotype.	8.52158
AML normal karyotype.	8.07248
AML normal karyotype.	9.08989
AML normal karyotype.	9.32528
AML normal karyotype.	9.4164
AML normal karyotype.	9.53028
AML normal karyotype.	10.1065
AML normal karyotype.	4.91623
AML normal karyotype.	10.0819
AML normal karyotype.	9.68174
AML normal karyotype.	8.73276
AML normal karyotype.	9.43254
AML normal karyotype.	8.67527
AML normal karyotype.	9.79206
AML normal karyotype.	9.51628
AML normal karyotype.	8.85458
AML normal karyotype.	9.136
AML normal karyotype.	8.5087
AML normal karyotype.	10.6141
AML normal karyotype.	8.11519
AML normal karyotype.	10.8401
AML normal karyotype.	9.43047
AML normal karyotype.	9.39527
AML normal karyotype.	10.1202
AML normal karyotype.	8.64566
AML normal karyotype.	10.8702
AML normal karyotype.	8.69205
AML normal karyotype.	9.23845
AML normal karyotype.	11.3691
AML normal karyotype.	9.2444
AML normal karyotype.	7.65122
AML normal karyotype.	9.88746
AML normal karyotype.	10.8498
AML normal karyotype.	9.96487
AML normal karyotype.	7.65612
AML normal karyotype.	11.3281
AML normal karyotype.	8.05077
AML normal karyotype.	8.40899
AML normal karyotype.	9.4713
AML normal karyotype.	9.81386
AML normal karyotype.	7.64464
AML normal karyotype.	9.28023
AML normal karyotype.	8.00602
AML normal karyotype.	9.48365
AML normal karyotype.	7.23461
AML normal karyotype.	8.65944
AML normal karyotype.	9.13693
AML normal karyotype.	10.0881
AML normal karyotype.	8.26727
AML normal karyotype.	8.28806
AML normal karyotype.	10.5356
AML normal karyotype.	9.58851
AML normal karyotype.	8.99651
AML normal karyotype.	8.95147
AML normal karyotype.	9.37285
AML normal karyotype.	7.50232
AML normal karyotype.	9.01941
AML normal karyotype.	8.65946
AML normal karyotype.	8.97282
AML normal karyotype.	8.45771
AML normal karyotype.	7.8452
AML normal karyotype.	9.41428
AML normal karyotype.	8.70724
AML normal karyotype.	9.27786
AML normal karyotype.	8.40697
AML normal karyotype.	9.23711
AML normal karyotype.	10.7748
AML normal karyotype.	10.3688
AML normal karyotype.	9.93051
AML normal karyotype.	8.63839
AML normal karyotype.	9.65059
AML normal karyotype.	9.37109
AML normal karyotype.	8.96887
AML normal karyotype.	7.59133
AML normal karyotype.	8.08409
AML normal karyotype.	5.92815
AML normal karyotype.	6.81997
AML normal karyotype.	8.70383
AML normal karyotype.	9.06108
AML normal karyotype.	9.39891
AML normal karyotype.	6.1626
AML normal karyotype.	10.022
AML normal karyotype.	9.14072
AML normal karyotype.	9.58059
AML normal karyotype.	9.18109
AML normal karyotype.	9.78836
AML normal karyotype.	9.53265
AML normal karyotype.	6.69164
AML normal karyotype.	10.1013
AML normal karyotype.	7.37039
AML normal karyotype.	10.2385
AML normal karyotype.	9.07604
AML normal karyotype.	9.98874
AML normal karyotype.	9.46776
AML normal karyotype.	10.5048
AML normal karyotype.	7.88263
AML normal karyotype.	10.2812
AML normal karyotype.	10.5421
AML normal karyotype.	8.09166
AML normal karyotype.	7.75689
AML normal karyotype.	10.6587
AML normal karyotype.	6.15656
AML normal karyotype.	8.96982
AML normal karyotype.	10.2705
AML normal karyotype.	10.4949
AML normal karyotype.	11.507
AML normal karyotype.	9.70986
AML normal karyotype.	8.18902
AML normal karyotype.	9.55747
AML normal karyotype.	7.30926
AML normal karyotype.	9.93827
AML normal karyotype.	7.80585
AML normal karyotype.	9.42151
AML normal karyotype.	6.96887
AML normal karyotype.	7.43528
AML normal karyotype.	6.76285
AML normal karyotype.	8.75099
AML normal karyotype.	10.139
AML complex.	10.4257
AML complex.	7.88867
AML complex.	9.10812
AML complex.	9.95011
AML complex.	9.303
AML complex.	9.35559
AML complex.	8.68706
AML complex.	8.38365
AML complex.	9.82203
AML complex.	8.48782
AML complex.	11.5965
AML complex.	10.6871
AML complex.	9.39739
AML complex.	10.2657
AML complex.	10.4219
AML complex.	8.40244
AML complex.	9.92842
AML complex.	10.4537
AML complex.	9.23243
AML complex.	8.1085
AML complex.	8.25145
AML complex.	9.98695
AML complex.	9.63715
AML complex.	9.95023
AML complex.	8.79579
AML complex.	10.66
AML complex.	8.33064
AML complex.	10.842
AML complex.	8.51047
AML complex.	10.6368
AML complex.	7.59921
AML complex.	9.03747
AML complex.	9.51349
AML complex.	9.75962
AML complex.	9.46941
AML complex.	10.3084
AML complex.	8.56651
AML complex.	10.3936
AML complex.	7.42827
AML complex.	9.95095
AML complex.	9.44241
AML complex.	8.42496
AML complex.	11.3823
AML complex.	8.86579
AML complex.	7.48465
AML complex.	8.52505
AML complex.	10.9262
AML complex.	9.56568
AML inv(16)	9.06281
AML inv(16)	11.0292
AML inv(16)	7.33496
AML inv(16)	9.65235
AML inv(16)	10.6676
AML inv(16)	10.0732
AML inv(16)	11.1452
AML inv(16)	9.69287
AML inv(16)	9.86256
AML inv(16)	10.7246
AML inv(16)	10.7856
AML inv(16)	8.25485
AML inv(16)	9.97514
AML inv(16)	10.6977
AML inv(16)	9.87548
AML inv(16)	9.99646
AML inv(16)	9.33283
AML inv(16)	10.5221
AML inv(16)	9.6635
AML inv(16)	10.5584
AML inv(16)	10.5518
AML inv(16)	10.7061
AML inv(16)	10.9956
AML inv(16)	11.1051
AML inv(16)	10.0341
AML inv(16)	11.3591
AML inv(16)	8.54719
AML inv(16)	9.90712
Healthy bone marrow	7.97143
Healthy bone marrow	7.16947
Healthy bone marrow	9.16856
Healthy bone marrow	7.76928
Healthy bone marrow	8.01647
Healthy bone marrow	7.87248
Healthy bone marrow	7.566
Healthy bone marrow	8.33513
Healthy bone marrow	8.3204
Healthy bone marrow	9.18196
Healthy bone marrow	7.92374
Healthy bone marrow	7.7799
Healthy bone marrow	8.4782
Healthy bone marrow	6.92793
Healthy bone marrow	7.23884
Healthy bone marrow	8.27648
Healthy bone marrow	8.26965
Healthy bone marrow	8.19874
Healthy bone marrow	6.84327
Healthy bone marrow	7.82274
Healthy bone marrow	7.80592
Healthy bone marrow	9.43448
Healthy bone marrow	7.49286
Healthy bone marrow	8.19331
Healthy bone marrow	8.01951
Healthy bone marrow	8.81598
Healthy bone marrow	8.97106
Healthy bone marrow	8.15334
Healthy bone marrow	8.14525
Healthy bone marrow	7.18611
Healthy bone marrow	8.15479
Healthy bone marrow	8.28992
Healthy bone marrow	8.22162
Healthy bone marrow	7.98917
Healthy bone marrow	8.32478
Healthy bone marrow	8.25608
Healthy bone marrow	7.39933
Healthy bone marrow	7.09523
Healthy bone marrow	7.71899
Healthy bone marrow	6.42871
Healthy bone marrow	9.61014
Healthy bone marrow	8.52402
Healthy bone marrow	7.79587
Healthy bone marrow	7.41009
Healthy bone marrow	7.53423
Healthy bone marrow	7.28102
Healthy bone marrow	7.09015
Healthy bone marrow	6.23258
Healthy bone marrow	8.50337
Healthy bone marrow	9.3737
Healthy bone marrow	7.73845
Healthy bone marrow	8.44905
Healthy bone marrow	8.7704
Healthy bone marrow	8.09374
Healthy bone marrow	7.16163
Healthy bone marrow	8.33655
Healthy bone marrow	8.39412
Healthy bone marrow	7.54669
Healthy bone marrow	8.91842
Healthy bone marrow	7.93638
Healthy bone marrow	7.87314
Healthy bone marrow	8.23901
Healthy bone marrow	8.03558
Healthy bone marrow	8.16159
Healthy bone marrow	8.88245
Healthy bone marrow	8.24298
Healthy bone marrow	7.62124
Healthy bone marrow	4.8611
Healthy bone marrow	6.47885
Healthy bone marrow	8.48156
Healthy bone marrow	8.31874
Healthy bone marrow	6.32243
Healthy bone marrow	9.73115
AML t(15;17)	8.37412
AML t(15;17)	9.41228
AML t(15;17)	8.98277
AML t(15;17)	8.57025
AML t(15;17)	6.76017
AML t(15;17)	8.24054
AML t(15;17)	8.35371
AML t(15;17)	8.50361
AML t(15;17)	9.00632
AML t(15;17)	8.7894
AML t(15;17)	8.69691
AML t(15;17)	7.30099
AML t(15;17)	9.14197
AML t(15;17)	8.04489
AML t(15;17)	8.69139
AML t(15;17)	7.4936
AML t(15;17)	8.25316
AML t(15;17)	8.51944
AML t(15;17)	8.65038
AML t(15;17)	7.76788
AML t(15;17)	9.41687
AML t(15;17)	7.78229
AML t(15;17)	8.41384
AML t(15;17)	8.62218
AML t(15;17)	9.44008
AML t(15;17)	8.38085
AML t(15;17)	7.88253
AML t(15;17)	9.94165
AML t(15;17)	10.0747
AML t(15;17)	7.27257
AML t(15;17)	10.214
AML t(15;17)	5.09246
AML t(15;17)	8.49279
AML t(15;17)	6.36772
AML t(15;17)	8.58791
AML t(15;17)	6.76307
AML t(15;17)	8.79734
AML t(8;21)	8.58777
AML t(8;21)	9.05641
AML t(8;21)	8.26926
AML t(8;21)	7.8593
AML t(8;21)	7.55642
AML t(8;21)	7.95074
AML t(8;21)	9.917
AML t(8;21)	9.68618
AML t(8;21)	8.91074
AML t(8;21)	7.72356
AML t(8;21)	8.40175
AML t(8;21)	7.45449
AML t(8;21)	8.24099
AML t(8;21)	7.25455
AML t(8;21)	8.20296
AML t(8;21)	7.61189
AML t(8;21)	8.83058
AML t(8;21)	10.5729
AML t(8;21)	7.01803
AML t(8;21)	8.62119
AML t(8;21)	8.74331
AML t(8;21)	8.00118
AML t(8;21)	7.07418
AML t(8;21)	9.51366
AML t(8;21)	8.22149
AML t(8;21)	7.67161
AML t(8;21)	8.39202
AML t(8;21)	8.28522
AML t(8;21)	8.40685
AML t(8;21)	7.08223
AML t(8;21)	10.1123
AML t(8;21)	7.19704
AML t(8;21)	9.49128
AML t(8;21)	9.24097
AML t(8;21)	9.36832
AML t(8;21)	8.02178
AML t(8;21)	8.20881
AML t(8;21)	7.23505
AML t(8;21)	7.9328
AML t(8;21)	7.63143
AML MLL	4.80005
AML MLL	8.67424
AML MLL	8.11572
AML MLL	6.83691
AML MLL	6.37715
AML MLL	6.57447
AML MLL	5.89643
AML MLL	7.49933
AML MLL	7.09267
AML MLL	8.61104
AML MLL	6.23348
AML MLL	8.09019
AML MLL	7.46781
AML MLL	9.25806
AML MLL	8.98216
AML MLL	8.04295
AML MLL	10.0993
AML MLL	8.34466
AML MLL	6.55711
AML MLL	7.10381
AML MLL	11.0551
AML MLL	7.27063
AML MLL	6.68376
AML MLL	8.24438
AML MLL	4.22307
AML MLL	7.20089
AML MLL	9.89683
AML MLL	8.66602
AML MLL	7.34496
AML MLL	6.46872
AML MLL	5.80321
AML MLL	8.69507
AML MLL	8.86518
AML MLL	6.38017
AML MLL	10.3461
AML MLL	7.22957
AML MLL	9.86001
AML MLL	7.80026

## Sheet: TSC22D2 expression
TSC22D2 (log2)	210953_at
AML normal karyotype.	3.91129
AML normal karyotype.	4.13515
AML normal karyotype.	4.03792
AML normal karyotype.	4.2578
AML normal karyotype.	4.1851
AML normal karyotype.	4.31159
AML normal karyotype.	4.01141
AML normal karyotype.	4.65146
AML normal karyotype.	4.47214
AML normal karyotype.	3.93068
AML normal karyotype.	4.10391
AML normal karyotype.	4.20408
AML normal karyotype.	5.11847
AML normal karyotype.	4.07322
AML normal karyotype.	4.25176
AML normal karyotype.	3.78624
AML normal karyotype.	4.26372
AML normal karyotype.	4.26133
AML normal karyotype.	3.79452
AML normal karyotype.	4.16678
AML normal karyotype.	5.37405
AML normal karyotype.	4.05449
AML normal karyotype.	3.67445
AML normal karyotype.	4.18329
AML normal karyotype.	4.48612
AML normal karyotype.	4.07856
AML normal karyotype.	4.4833
AML normal karyotype.	4.03643
AML normal karyotype.	4.50444
AML normal karyotype.	4.48149
AML normal karyotype.	3.95913
AML normal karyotype.	3.87574
AML normal karyotype.	4.31555
AML normal karyotype.	4.16246
AML normal karyotype.	3.8997
AML normal karyotype.	4.16849
AML normal karyotype.	4.45835
AML normal karyotype.	5.31051
AML normal karyotype.	4.0445
AML normal karyotype.	4.34417
AML normal karyotype.	3.95752
AML normal karyotype.	4.29877
AML normal karyotype.	4.09695
AML normal karyotype.	4.20622
AML normal karyotype.	4.44389
AML normal karyotype.	3.82048
AML normal karyotype.	3.96756
AML normal karyotype.	4.11051
AML normal karyotype.	3.98157
AML normal karyotype.	4.35603
AML normal karyotype.	4.05465
AML normal karyotype.	4.16713
AML normal karyotype.	4.14856
AML normal karyotype.	4.15347
AML normal karyotype.	4.07198
AML normal karyotype.	3.98209
AML normal karyotype.	4.27921
AML normal karyotype.	4.17635
AML normal karyotype.	4.08965
AML normal karyotype.	4.9406
AML normal karyotype.	4.48527
AML normal karyotype.	4.2243
AML normal karyotype.	3.89086
AML normal karyotype.	4.21839
AML normal karyotype.	4.58052
AML normal karyotype.	4.03346
AML normal karyotype.	4.20952
AML normal karyotype.	4.06018
AML normal karyotype.	4.35313
AML normal karyotype.	5.2076
AML normal karyotype.	4.72916
AML normal karyotype.	4.00992
AML normal karyotype.	3.95181
AML normal karyotype.	4.05823
AML normal karyotype.	4.08533
AML normal karyotype.	4.02007
AML normal karyotype.	4.01131
AML normal karyotype.	4.05226
AML normal karyotype.	4.17668
AML normal karyotype.	3.85069
AML normal karyotype.	3.78379
AML normal karyotype.	4.72212
AML normal karyotype.	4.28096
AML normal karyotype.	4.11247
AML normal karyotype.	4.06962
AML normal karyotype.	4.24434
AML normal karyotype.	4.093
AML normal karyotype.	4.02872
AML normal karyotype.	4.13723
AML normal karyotype.	4.51179
AML normal karyotype.	3.95309
AML normal karyotype.	4.06611
AML normal karyotype.	4.16641
AML normal karyotype.	3.89909
AML normal karyotype.	4.7331
AML normal karyotype.	4.38337
AML normal karyotype.	4.00985
AML normal karyotype.	4.33408
AML normal karyotype.	4.51446
AML normal karyotype.	3.59506
AML normal karyotype.	4.03372
AML normal karyotype.	4.19363
AML normal karyotype.	4.11791
AML normal karyotype.	4.18307
AML normal karyotype.	3.86052
AML normal karyotype.	4.33626
AML normal karyotype.	4.24708
AML normal karyotype.	4.34157
AML normal karyotype.	4.56154
AML normal karyotype.	3.94707
AML normal karyotype.	3.9703
AML normal karyotype.	4.23798
AML normal karyotype.	4.28252
AML normal karyotype.	4.22986
AML normal karyotype.	4.26752
AML normal karyotype.	4.04873
AML normal karyotype.	4.25263
AML normal karyotype.	4.35852
AML normal karyotype.	4.17127
AML normal karyotype.	4.18889
AML normal karyotype.	3.99807
AML normal karyotype.	3.79628
AML normal karyotype.	4.04566
AML normal karyotype.	3.90437
AML normal karyotype.	4.42789
AML normal karyotype.	4.0497
AML normal karyotype.	3.92621
AML normal karyotype.	4.14533
AML normal karyotype.	3.96189
AML normal karyotype.	4.42461
AML normal karyotype.	4.46003
AML normal karyotype.	4.3456
AML normal karyotype.	3.90762
AML normal karyotype.	3.97342
AML normal karyotype.	4.3374
AML normal karyotype.	4.09233
AML normal karyotype.	4.49837
AML normal karyotype.	3.92235
AML normal karyotype.	3.88364
AML normal karyotype.	3.86652
AML normal karyotype.	3.92742
AML normal karyotype.	4.22962
AML normal karyotype.	4.0093
AML normal karyotype.	3.85156
AML normal karyotype.	4.09121
AML normal karyotype.	3.63903
AML normal karyotype.	4.23242
AML normal karyotype.	3.77852
AML normal karyotype.	3.8984
AML normal karyotype.	4.28073
AML normal karyotype.	4.03721
AML normal karyotype.	4.03157
AML normal karyotype.	3.67377
AML normal karyotype.	3.90787
AML normal karyotype.	3.97555
AML normal karyotype.	4.87157
AML normal karyotype.	3.96826
AML normal karyotype.	4.60816
AML normal karyotype.	4.08331
AML normal karyotype.	3.98881
AML normal karyotype.	4.31515
AML normal karyotype.	4.56101
AML normal karyotype.	4.01592
AML normal karyotype.	5.00698
AML normal karyotype.	3.88861
AML normal karyotype.	4.58413
AML normal karyotype.	4.00429
AML normal karyotype.	3.91447
AML normal karyotype.	4.0388
AML normal karyotype.	3.95221
AML normal karyotype.	3.90357
AML normal karyotype.	4.18087
AML normal karyotype.	4.36728
AML normal karyotype.	4.08435
AML normal karyotype.	4.04079
AML normal karyotype.	3.9704
AML normal karyotype.	5.3189
AML normal karyotype.	4.4513
AML normal karyotype.	4.12744
AML normal karyotype.	3.9154
AML normal karyotype.	3.89592
AML normal karyotype.	4.13538
AML normal karyotype.	3.82655
AML normal karyotype.	4.10828
AML normal karyotype.	4.11391
AML normal karyotype.	4.1117
AML normal karyotype.	4.00693
AML normal karyotype.	4.27894
AML normal karyotype.	3.74293
AML normal karyotype.	3.74733
AML normal karyotype.	3.94662
AML normal karyotype.	4.26986
AML normal karyotype.	3.70404
AML normal karyotype.	4.13194
AML normal karyotype.	4.04981
AML normal karyotype.	4.94892
AML normal karyotype.	3.3501
AML normal karyotype.	5.05256
AML normal karyotype.	4.04323
AML normal karyotype.	4.01382
AML normal karyotype.	3.94459
AML normal karyotype.	3.80833
AML normal karyotype.	4.28074
AML normal karyotype.	3.92639
AML normal karyotype.	4.33524
AML normal karyotype.	3.99654
AML normal karyotype.	4.43486
AML normal karyotype.	3.9792
AML normal karyotype.	4.55661
AML normal karyotype.	4.38832
AML normal karyotype.	4.34048
AML normal karyotype.	4.01207
AML normal karyotype.	4.31689
AML normal karyotype.	4.53796
AML normal karyotype.	3.92356
AML normal karyotype.	4.27449
AML normal karyotype.	4.19398
AML normal karyotype.	3.88791
AML normal karyotype.	4.20463
AML normal karyotype.	3.98748
AML normal karyotype.	4.0357
AML normal karyotype.	4.19821
AML normal karyotype.	4.82446
AML normal karyotype.	4.26943
AML normal karyotype.	3.95084
AML normal karyotype.	4.07732
AML normal karyotype.	4.23044
AML normal karyotype.	3.91865
AML normal karyotype.	4.02447
AML normal karyotype.	4.03667
AML normal karyotype.	3.86356
AML normal karyotype.	4.36581
AML normal karyotype.	3.99992
AML normal karyotype.	4.01725
AML normal karyotype.	3.90877
AML normal karyotype.	4.02535
AML normal karyotype.	3.94718
AML normal karyotype.	4.5661
AML normal karyotype.	3.91192
AML normal karyotype.	4.43687
AML normal karyotype.	4.18874
AML normal karyotype.	4.05178
AML normal karyotype.	3.95929
AML normal karyotype.	4.0561
AML normal karyotype.	4.08333
AML normal karyotype.	3.9961
AML normal karyotype.	3.96134
AML normal karyotype.	4.04907
AML normal karyotype.	4.13146
AML normal karyotype.	4.1208
AML normal karyotype.	4.08005
AML normal karyotype.	4.33458
AML normal karyotype.	4.62579
AML normal karyotype.	4.26438
AML normal karyotype.	4.31757
AML normal karyotype.	3.92604
AML normal karyotype.	4.00114
AML normal karyotype.	4.32656
AML normal karyotype.	4.1894
AML normal karyotype.	3.9993
AML normal karyotype.	4.18649
AML normal karyotype.	3.80665
AML normal karyotype.	4.09335
AML normal karyotype.	3.97706
AML normal karyotype.	4.10702
AML normal karyotype.	4.06769
AML normal karyotype.	4.02321
AML normal karyotype.	4.20226
AML normal karyotype.	3.93438
AML normal karyotype.	4.30936
AML normal karyotype.	4.1527
AML normal karyotype.	4.23469
AML normal karyotype.	4.06282
AML normal karyotype.	4.2133
AML normal karyotype.	4.10946
AML normal karyotype.	4.1258
AML normal karyotype.	4.08527
AML normal karyotype.	3.93826
AML normal karyotype.	4.2664
AML normal karyotype.	3.69485
AML normal karyotype.	4.23641
AML normal karyotype.	4.04956
AML normal karyotype.	4.95729
AML normal karyotype.	4.54236
AML normal karyotype.	3.85527
AML normal karyotype.	3.98056
AML normal karyotype.	3.92993
AML normal karyotype.	4.32671
AML normal karyotype.	4.29609
AML normal karyotype.	4.25354
AML normal karyotype.	4.27919
AML normal karyotype.	4.60364
AML normal karyotype.	4.26369
AML normal karyotype.	5.02324
AML normal karyotype.	3.89673
AML normal karyotype.	4.18633
AML normal karyotype.	3.99872
AML normal karyotype.	3.76341
AML normal karyotype.	3.80495
AML normal karyotype.	4.51682
AML normal karyotype.	3.98253
AML normal karyotype.	4.11068
AML normal karyotype.	4.66139
AML normal karyotype.	4.078
AML normal karyotype.	3.94272
AML normal karyotype.	4.2083
AML normal karyotype.	4.12508
AML normal karyotype.	4.33512
AML normal karyotype.	4.07523
AML normal karyotype.	4.47628
AML normal karyotype.	4.05845
AML normal karyotype.	4.05858
AML normal karyotype.	4.85029
AML normal karyotype.	4.78228
AML normal karyotype.	3.99451
AML normal karyotype.	4.2176
AML normal karyotype.	4.06584
AML normal karyotype.	3.74649
AML normal karyotype.	3.94192
AML normal karyotype.	3.99642
AML normal karyotype.	4.14725
AML normal karyotype.	4.08852
AML normal karyotype.	4.07818
AML normal karyotype.	4.03754
AML normal karyotype.	4.18326
AML normal karyotype.	4.64474
AML normal karyotype.	4.32309
AML normal karyotype.	4.39298
AML normal karyotype.	4.47845
AML normal karyotype.	3.97253
AML normal karyotype.	4.24241
AML normal karyotype.	4.68514
AML normal karyotype.	3.95695
AML normal karyotype.	4.84336
AML normal karyotype.	3.86458
AML normal karyotype.	3.97099
AML normal karyotype.	4.01303
AML normal karyotype.	4.09691
AML normal karyotype.	4.62776
AML normal karyotype.	4.49049
AML normal karyotype.	3.91062
AML normal karyotype.	3.99846
AML normal karyotype.	4.29038
AML normal karyotype.	3.91063
AML normal karyotype.	4.11466
AML normal karyotype.	3.9914
AML normal karyotype.	4.30173
AML normal karyotype.	3.96927
AML normal karyotype.	3.69953
AML normal karyotype.	4.24051
AML normal karyotype.	4.00585
AML complex.	4.37494
AML complex.	5.04344
AML complex.	4.44016
AML complex.	4.43103
AML complex.	3.87799
AML complex.	4.03836
AML complex.	4.32616
AML complex.	4.12319
AML complex.	4.04262
AML complex.	4.35427
AML complex.	4.37025
AML complex.	3.99739
AML complex.	4.21029
AML complex.	4.04576
AML complex.	4.20783
AML complex.	3.97231
AML complex.	4.29074
AML complex.	4.28184
AML complex.	4.23055
AML complex.	4.31088
AML complex.	4.01236
AML complex.	4.15241
AML complex.	3.95452
AML complex.	4.15748
AML complex.	3.96746
AML complex.	4.06119
AML complex.	4.43982
AML complex.	3.95683
AML complex.	4.12335
AML complex.	4.1383
AML complex.	4.35951
AML complex.	4.11713
AML complex.	3.99022
AML complex.	4.11672
AML complex.	3.96929
AML complex.	3.97217
AML complex.	4.08896
AML complex.	4.37306
AML complex.	3.94266
AML complex.	4.02454
AML complex.	4.42827
AML complex.	4.15083
AML complex.	4.12093
AML complex.	4.38992
AML complex.	4.02581
AML complex.	4.06325
AML complex.	4.09099
AML complex.	3.88774
AML inv(16)	3.67058
AML inv(16)	3.82787
AML inv(16)	3.90893
AML inv(16)	4.14559
AML inv(16)	3.93048
AML inv(16)	4.07907
AML inv(16)	3.95866
AML inv(16)	4.16134
AML inv(16)	3.97716
AML inv(16)	4.32439
AML inv(16)	4.1281
AML inv(16)	3.93879
AML inv(16)	4.90389
AML inv(16)	3.93847
AML inv(16)	4.18749
AML inv(16)	3.86381
AML inv(16)	4.11182
AML inv(16)	4.76595
AML inv(16)	4.06597
AML inv(16)	3.7541
AML inv(16)	3.46746
AML inv(16)	4.20537
AML inv(16)	4.23715
AML inv(16)	3.97069
AML inv(16)	4.06705
AML inv(16)	4.13443
AML inv(16)	4.01682
AML inv(16)	3.95998
Healthy bone marrow	4.30366
Healthy bone marrow	4.0943
Healthy bone marrow	4.35483
Healthy bone marrow	3.93115
Healthy bone marrow	4.28935
Healthy bone marrow	4.67522
Healthy bone marrow	3.78647
Healthy bone marrow	4.11963
Healthy bone marrow	3.58511
Healthy bone marrow	3.93248
Healthy bone marrow	3.80502
Healthy bone marrow	4.3098
Healthy bone marrow	4.14869
Healthy bone marrow	4.55226
Healthy bone marrow	4.79093
Healthy bone marrow	4.00917
Healthy bone marrow	4.05833
Healthy bone marrow	3.85799
Healthy bone marrow	3.96554
Healthy bone marrow	3.93978
Healthy bone marrow	3.93451
Healthy bone marrow	4.00975
Healthy bone marrow	4.49281
Healthy bone marrow	3.70897
Healthy bone marrow	4.16383
Healthy bone marrow	3.77784
Healthy bone marrow	3.81537
Healthy bone marrow	4.29921
Healthy bone marrow	4.03052
Healthy bone marrow	4.06866
Healthy bone marrow	4.0886
Healthy bone marrow	4.21509
Healthy bone marrow	3.90032
Healthy bone marrow	3.82933
Healthy bone marrow	4.30112
Healthy bone marrow	4.10026
Healthy bone marrow	3.95189
Healthy bone marrow	4.2553
Healthy bone marrow	4.00606
Healthy bone marrow	4.11462
Healthy bone marrow	4.14682
Healthy bone marrow	3.70173
Healthy bone marrow	4.00303
Healthy bone marrow	4.01189
Healthy bone marrow	4.05032
Healthy bone marrow	4.15523
Healthy bone marrow	4.12257
Healthy bone marrow	4.71553
Healthy bone marrow	3.98168
Healthy bone marrow	3.87035
Healthy bone marrow	4.07576
Healthy bone marrow	4.23606
Healthy bone marrow	3.80174
Healthy bone marrow	3.95902
Healthy bone marrow	4.13326
Healthy bone marrow	3.93698
Healthy bone marrow	4.00572
Healthy bone marrow	3.96296
Healthy bone marrow	3.79656
Healthy bone marrow	3.79629
Healthy bone marrow	3.94313
Healthy bone marrow	4.02784
Healthy bone marrow	4.05346
Healthy bone marrow	4.34592
Healthy bone marrow	3.78784
Healthy bone marrow	3.85004
Healthy bone marrow	4.17092
Healthy bone marrow	4.48234
Healthy bone marrow	4.79383
Healthy bone marrow	4.2247
Healthy bone marrow	4.22729
Healthy bone marrow	4.1835
Healthy bone marrow	4.5163
AML t(15;17)	4.21645
AML t(15;17)	3.99794
AML t(15;17)	4.1194
AML t(15;17)	3.7372
AML t(15;17)	4.11385
AML t(15;17)	3.84656
AML t(15;17)	3.62713
AML t(15;17)	3.77952
AML t(15;17)	3.93697
AML t(15;17)	3.9571
AML t(15;17)	4.42755
AML t(15;17)	4.38533
AML t(15;17)	3.75539
AML t(15;17)	4.1142
AML t(15;17)	4.2129
AML t(15;17)	3.89926
AML t(15;17)	3.79932
AML t(15;17)	3.74617
AML t(15;17)	4.19611
AML t(15;17)	3.9813
AML t(15;17)	4.40668
AML t(15;17)	4.01812
AML t(15;17)	3.75387
AML t(15;17)	3.96641
AML t(15;17)	3.8178
AML t(15;17)	3.94014
AML t(15;17)	4.18031
AML t(15;17)	4.46027
AML t(15;17)	4.05336
AML t(15;17)	3.49263
AML t(15;17)	3.89652
AML t(15;17)	4.77179
AML t(15;17)	4.23586
AML t(15;17)	4.00958
AML t(15;17)	4.05174
AML t(15;17)	4.17276
AML t(15;17)	3.98581
AML t(8;21)	4.25578
AML t(8;21)	3.89906
AML t(8;21)	4.16848
AML t(8;21)	4.05591
AML t(8;21)	3.99064
AML t(8;21)	3.84384
AML t(8;21)	4.14668
AML t(8;21)	4.01388
AML t(8;21)	4.17748
AML t(8;21)	4.03927
AML t(8;21)	4.06862
AML t(8;21)	4.17622
AML t(8;21)	4.25053
AML t(8;21)	3.97581
AML t(8;21)	3.83453
AML t(8;21)	3.6984
AML t(8;21)	4.11582
AML t(8;21)	3.74022
AML t(8;21)	4.00227
AML t(8;21)	4.73138
AML t(8;21)	4.18936
AML t(8;21)	4.2
AML t(8;21)	4.12544
AML t(8;21)	4.03241
AML t(8;21)	4.29669
AML t(8;21)	3.96615
AML t(8;21)	3.70695
AML t(8;21)	4.0563
AML t(8;21)	4.38767
AML t(8;21)	3.91561
AML t(8;21)	4.13623
AML t(8;21)	3.9243
AML t(8;21)	4.1731
AML t(8;21)	4.31148
AML t(8;21)	4.12677
AML t(8;21)	3.97621
AML t(8;21)	4.01122
AML t(8;21)	3.85003
AML t(8;21)	4.19969
AML t(8;21)	3.73071
AML MLL	4.06001
AML MLL	4.65338
AML MLL	3.9752
AML MLL	4.4075
AML MLL	4.43994
AML MLL	3.91503
AML MLL	4.63672
AML MLL	4.06973
AML MLL	3.82851
AML MLL	4.36956
AML MLL	4.08393
AML MLL	4.22088
AML MLL	5.15787
AML MLL	4.50686
AML MLL	3.98831
AML MLL	4.13291
AML MLL	4.10661
AML MLL	4.41054
AML MLL	4.30038
AML MLL	4.22809
AML MLL	4.8674
AML MLL	4.26556
AML MLL	4.11973
AML MLL	3.93575
AML MLL	4.2837
AML MLL	4.28609
AML MLL	4.20432
AML MLL	3.89118
AML MLL	3.85054
AML MLL	4.20802
AML MLL	3.9157
AML MLL	4.16478
AML MLL	4.21096
AML MLL	4.12082
AML MLL	4.11425
AML MLL	4.40291
AML MLL	3.5581
AML MLL	6.79867

## Sheet: TSC22D3 expression
TSC22D3 (log2)	208763_s_at
AML normal karyotype.	10.5793
AML normal karyotype.	10.0254
AML normal karyotype.	9.75604
AML normal karyotype.	10.8877
AML normal karyotype.	10.486
AML normal karyotype.	10.6071
AML normal karyotype.	10.54
AML normal karyotype.	10.7292
AML normal karyotype.	10.9944
AML normal karyotype.	7.78742
AML normal karyotype.	10.5879
AML normal karyotype.	10.4798
AML normal karyotype.	9.94277
AML normal karyotype.	10.5811
AML normal karyotype.	9.93817
AML normal karyotype.	9.35756
AML normal karyotype.	7.10995
AML normal karyotype.	7.90795
AML normal karyotype.	9.73346
AML normal karyotype.	10.5379
AML normal karyotype.	10.2913
AML normal karyotype.	8.31902
AML normal karyotype.	9.30508
AML normal karyotype.	10.2086
AML normal karyotype.	10.9063
AML normal karyotype.	11.2076
AML normal karyotype.	10.0973
AML normal karyotype.	11.0165
AML normal karyotype.	8.44652
AML normal karyotype.	9.82888
AML normal karyotype.	10.0251
AML normal karyotype.	10.9218
AML normal karyotype.	9.32472
AML normal karyotype.	10.2791
AML normal karyotype.	10.9567
AML normal karyotype.	10.7568
AML normal karyotype.	10.4205
AML normal karyotype.	9.47273
AML normal karyotype.	8.65665
AML normal karyotype.	10.2863
AML normal karyotype.	10.9014
AML normal karyotype.	10.1492
AML normal karyotype.	10.119
AML normal karyotype.	10.1759
AML normal karyotype.	10.0408
AML normal karyotype.	9.89219
AML normal karyotype.	8.68161
AML normal karyotype.	10.6569
AML normal karyotype.	10.6638
AML normal karyotype.	10.4455
AML normal karyotype.	10.3886
AML normal karyotype.	10.1227
AML normal karyotype.	11.0228
AML normal karyotype.	10.8098
AML normal karyotype.	9.69862
AML normal karyotype.	9.79105
AML normal karyotype.	10.4636
AML normal karyotype.	10.8832
AML normal karyotype.	11.225
AML normal karyotype.	10.0809
AML normal karyotype.	10.4057
AML normal karyotype.	9.97999
AML normal karyotype.	11.41
AML normal karyotype.	9.9593
AML normal karyotype.	10.9083
AML normal karyotype.	10.3813
AML normal karyotype.	10.401
AML normal karyotype.	10.9557
AML normal karyotype.	11.4469
AML normal karyotype.	8.85904
AML normal karyotype.	10.5018
AML normal karyotype.	9.11463
AML normal karyotype.	10.6805
AML normal karyotype.	9.03273
AML normal karyotype.	10.2558
AML normal karyotype.	9.88055
AML normal karyotype.	10.8178
AML normal karyotype.	10.0923
AML normal karyotype.	7.32748
AML normal karyotype.	10.7122
AML normal karyotype.	11.0385
AML normal karyotype.	9.86469
AML normal karyotype.	10.9453
AML normal karyotype.	11.3804
AML normal karyotype.	10.605
AML normal karyotype.	10.7649
AML normal karyotype.	11.3815
AML normal karyotype.	10.2283
AML normal karyotype.	10.1217
AML normal karyotype.	9.94811
AML normal karyotype.	9.63957
AML normal karyotype.	10.452
AML normal karyotype.	9.79566
AML normal karyotype.	10.5557
AML normal karyotype.	9.60455
AML normal karyotype.	10.9664
AML normal karyotype.	9.77925
AML normal karyotype.	10.2767
AML normal karyotype.	11.1398
AML normal karyotype.	11.4498
AML normal karyotype.	10.302
AML normal karyotype.	11.2671
AML normal karyotype.	11.6139
AML normal karyotype.	11.0549
AML normal karyotype.	11.2727
AML normal karyotype.	10.6439
AML normal karyotype.	10.9933
AML normal karyotype.	9.49639
AML normal karyotype.	10.6111
AML normal karyotype.	11.5124
AML normal karyotype.	9.76206
AML normal karyotype.	10.4263
AML normal karyotype.	10.2243
AML normal karyotype.	10.3575
AML normal karyotype.	10.5116
AML normal karyotype.	10.3975
AML normal karyotype.	10.3247
AML normal karyotype.	9.14823
AML normal karyotype.	9.84489
AML normal karyotype.	9.77751
AML normal karyotype.	10.3776
AML normal karyotype.	10.2549
AML normal karyotype.	8.08754
AML normal karyotype.	7.22189
AML normal karyotype.	10.2314
AML normal karyotype.	8.85817
AML normal karyotype.	10.6884
AML normal karyotype.	9.49954
AML normal karyotype.	11.1075
AML normal karyotype.	8.10528
AML normal karyotype.	10.6791
AML normal karyotype.	10.1901
AML normal karyotype.	9.61577
AML normal karyotype.	10.4955
AML normal karyotype.	9.5094
AML normal karyotype.	10.4723
AML normal karyotype.	11.1747
AML normal karyotype.	10.7406
AML normal karyotype.	10.0599
AML normal karyotype.	9.5111
AML normal karyotype.	9.8395
AML normal karyotype.	10.5753
AML normal karyotype.	10.2142
AML normal karyotype.	10.1965
AML normal karyotype.	10.9502
AML normal karyotype.	8.96836
AML normal karyotype.	10.4923
AML normal karyotype.	9.74287
AML normal karyotype.	10.0586
AML normal karyotype.	10.8642
AML normal karyotype.	10.0038
AML normal karyotype.	10.5609
AML normal karyotype.	9.44438
AML normal karyotype.	10.8678
AML normal karyotype.	10.07
AML normal karyotype.	10.7913
AML normal karyotype.	11.025
AML normal karyotype.	8.40159
AML normal karyotype.	11.0312
AML normal karyotype.	10.1123
AML normal karyotype.	11.1296
AML normal karyotype.	10.1179
AML normal karyotype.	11.4238
AML normal karyotype.	5.57633
AML normal karyotype.	8.54349
AML normal karyotype.	9.99237
AML normal karyotype.	9.06385
AML normal karyotype.	10.9492
AML normal karyotype.	8.66477
AML normal karyotype.	10.5022
AML normal karyotype.	10.1165
AML normal karyotype.	10.4581
AML normal karyotype.	9.32992
AML normal karyotype.	10.3686
AML normal karyotype.	11.5374
AML normal karyotype.	10.4561
AML normal karyotype.	9.5729
AML normal karyotype.	10.8766
AML normal karyotype.	11.0386
AML normal karyotype.	10.2777
AML normal karyotype.	9.20776
AML normal karyotype.	10.8755
AML normal karyotype.	8.77892
AML normal karyotype.	10.3601
AML normal karyotype.	9.36688
AML normal karyotype.	10.355
AML normal karyotype.	10.1208
AML normal karyotype.	10.3888
AML normal karyotype.	10.1593
AML normal karyotype.	8.34567
AML normal karyotype.	9.59942
AML normal karyotype.	11.203
AML normal karyotype.	10.3693
AML normal karyotype.	9.52103
AML normal karyotype.	9.99195
AML normal karyotype.	10.4132
AML normal karyotype.	10.8727
AML normal karyotype.	10.5271
AML normal karyotype.	9.31948
AML normal karyotype.	10.4102
AML normal karyotype.	10.5126
AML normal karyotype.	9.5445
AML normal karyotype.	11.1324
AML normal karyotype.	11.1689
AML normal karyotype.	10.3528
AML normal karyotype.	10.7891
AML normal karyotype.	9.63898
AML normal karyotype.	10.9649
AML normal karyotype.	9.85665
AML normal karyotype.	9.86373
AML normal karyotype.	10.0719
AML normal karyotype.	11.4338
AML normal karyotype.	10.4242
AML normal karyotype.	8.86418
AML normal karyotype.	11.5173
AML normal karyotype.	10.07
AML normal karyotype.	8.67456
AML normal karyotype.	10.4585
AML normal karyotype.	10.924
AML normal karyotype.	11.1795
AML normal karyotype.	11.0227
AML normal karyotype.	9.88879
AML normal karyotype.	8.80148
AML normal karyotype.	11.2039
AML normal karyotype.	10.8112
AML normal karyotype.	10.7347
AML normal karyotype.	8.92993
AML normal karyotype.	11.1741
AML normal karyotype.	10.9931
AML normal karyotype.	9.38274
AML normal karyotype.	11.3601
AML normal karyotype.	11.3024
AML normal karyotype.	9.90236
AML normal karyotype.	9.26497
AML normal karyotype.	11.4456
AML normal karyotype.	10.1205
AML normal karyotype.	9.9275
AML normal karyotype.	11.738
AML normal karyotype.	9.93775
AML normal karyotype.	8.28075
AML normal karyotype.	9.8951
AML normal karyotype.	10.0408
AML normal karyotype.	10.7319
AML normal karyotype.	10.7238
AML normal karyotype.	10.0895
AML normal karyotype.	9.36907
AML normal karyotype.	10.0743
AML normal karyotype.	11.3048
AML normal karyotype.	9.40467
AML normal karyotype.	9.53049
AML normal karyotype.	9.19198
AML normal karyotype.	9.21299
AML normal karyotype.	9.80281
AML normal karyotype.	11.3356
AML normal karyotype.	10.9648
AML normal karyotype.	8.61947
AML normal karyotype.	11.0734
AML normal karyotype.	9.81477
AML normal karyotype.	10.7443
AML normal karyotype.	10.4972
AML normal karyotype.	10.9911
AML normal karyotype.	11.2447
AML normal karyotype.	7.80974
AML normal karyotype.	10.8141
AML normal karyotype.	9.69665
AML normal karyotype.	10.7492
AML normal karyotype.	10.8019
AML normal karyotype.	9.86914
AML normal karyotype.	10.5889
AML normal karyotype.	9.56796
AML normal karyotype.	9.76905
AML normal karyotype.	10.75
AML normal karyotype.	9.82521
AML normal karyotype.	9.53176
AML normal karyotype.	9.93761
AML normal karyotype.	10.5694
AML normal karyotype.	9.49725
AML normal karyotype.	10.9695
AML normal karyotype.	8.88893
AML normal karyotype.	8.08152
AML normal karyotype.	11.2014
AML normal karyotype.	9.81082
AML normal karyotype.	9.62311
AML normal karyotype.	10.6978
AML normal karyotype.	11.0296
AML normal karyotype.	10.1145
AML normal karyotype.	9.78116
AML normal karyotype.	9.75982
AML normal karyotype.	9.61339
AML normal karyotype.	10.4038
AML normal karyotype.	8.82406
AML normal karyotype.	7.38355
AML normal karyotype.	10.167
AML normal karyotype.	8.63281
AML normal karyotype.	10.6909
AML normal karyotype.	10.4648
AML normal karyotype.	10.503
AML normal karyotype.	11.2603
AML normal karyotype.	10.4281
AML normal karyotype.	11.7162
AML normal karyotype.	8.54421
AML normal karyotype.	9.03419
AML normal karyotype.	10.5886
AML normal karyotype.	7.96785
AML normal karyotype.	8.46353
AML normal karyotype.	8.97068
AML normal karyotype.	10.5718
AML normal karyotype.	11.3359
AML normal karyotype.	9.5121
AML normal karyotype.	10.1656
AML normal karyotype.	10.4122
AML normal karyotype.	10.362
AML normal karyotype.	7.38059
AML normal karyotype.	8.30252
AML normal karyotype.	11.1292
AML normal karyotype.	10.3896
AML normal karyotype.	10.3828
AML normal karyotype.	10.9943
AML normal karyotype.	11.099
AML normal karyotype.	9.30162
AML normal karyotype.	10.5009
AML normal karyotype.	10.6528
AML normal karyotype.	11.3595
AML normal karyotype.	11.3279
AML normal karyotype.	10.1345
AML normal karyotype.	9.26608
AML normal karyotype.	10.3077
AML normal karyotype.	10.6256
AML normal karyotype.	10.8354
AML normal karyotype.	10.2203
AML normal karyotype.	10.9927
AML normal karyotype.	8.65122
AML normal karyotype.	9.1669
AML normal karyotype.	9.92657
AML normal karyotype.	10.6483
AML normal karyotype.	11.1338
AML normal karyotype.	10.4816
AML normal karyotype.	11.1265
AML normal karyotype.	10.7129
AML normal karyotype.	9.53074
AML normal karyotype.	9.87304
AML normal karyotype.	10.3753
AML normal karyotype.	10.6364
AML normal karyotype.	9.70048
AML normal karyotype.	10.3776
AML normal karyotype.	10.1593
AML normal karyotype.	10.6435
AML normal karyotype.	10.056
AML normal karyotype.	9.44873
AML normal karyotype.	11.5406
AML normal karyotype.	10.303
AML complex.	10.8158
AML complex.	10.5594
AML complex.	10.1354
AML complex.	10.8382
AML complex.	10.7607
AML complex.	10.4222
AML complex.	9.83011
AML complex.	10.6431
AML complex.	10.338
AML complex.	9.91407
AML complex.	11.1176
AML complex.	10.5864
AML complex.	10.1912
AML complex.	10.6432
AML complex.	10.6035
AML complex.	7.73198
AML complex.	10.8557
AML complex.	10.1937
AML complex.	10.7648
AML complex.	8.64748
AML complex.	10.0944
AML complex.	9.36158
AML complex.	9.63047
AML complex.	9.92806
AML complex.	10.0537
AML complex.	11.0908
AML complex.	9.56863
AML complex.	9.14331
AML complex.	10.6623
AML complex.	9.95278
AML complex.	9.38658
AML complex.	9.69937
AML complex.	10.508
AML complex.	10.0766
AML complex.	10.9628
AML complex.	10.924
AML complex.	10.1216
AML complex.	10.4877
AML complex.	9.72508
AML complex.	10.3567
AML complex.	9.6461
AML complex.	10.446
AML complex.	10.7529
AML complex.	11.0878
AML complex.	10.8459
AML complex.	9.8988
AML complex.	10.8439
AML complex.	9.69432
AML inv(16)	10.0583
AML inv(16)	11.5835
AML inv(16)	10.0412
AML inv(16)	11.2155
AML inv(16)	10.9028
AML inv(16)	8.92898
AML inv(16)	10.7372
AML inv(16)	9.40752
AML inv(16)	10.7484
AML inv(16)	11.2142
AML inv(16)	10.859
AML inv(16)	8.00845
AML inv(16)	10.9469
AML inv(16)	11.2412
AML inv(16)	10.4025
AML inv(16)	10.9573
AML inv(16)	10.1102
AML inv(16)	10.7784
AML inv(16)	10.5126
AML inv(16)	11.1562
AML inv(16)	11.2483
AML inv(16)	10.8842
AML inv(16)	10.2831
AML inv(16)	11.111
AML inv(16)	9.96789
AML inv(16)	10.8934
AML inv(16)	10.3229
AML inv(16)	10.2679
Healthy bone marrow	10.436
Healthy bone marrow	10.1345
Healthy bone marrow	10.061
Healthy bone marrow	10.0278
Healthy bone marrow	10.6454
Healthy bone marrow	10.5645
Healthy bone marrow	9.54651
Healthy bone marrow	10.2435
Healthy bone marrow	10.0578
Healthy bone marrow	10.5603
Healthy bone marrow	10.2396
Healthy bone marrow	9.63185
Healthy bone marrow	10.9771
Healthy bone marrow	10.0136
Healthy bone marrow	9.62978
Healthy bone marrow	8.95619
Healthy bone marrow	10.6141
Healthy bone marrow	10.1846
Healthy bone marrow	10.6292
Healthy bone marrow	9.42196
Healthy bone marrow	9.36228
Healthy bone marrow	10.1572
Healthy bone marrow	8.95102
Healthy bone marrow	10.1289
Healthy bone marrow	9.01617
Healthy bone marrow	10.125
Healthy bone marrow	10.1639
Healthy bone marrow	10.4704
Healthy bone marrow	10.6643
Healthy bone marrow	9.71697
Healthy bone marrow	9.26964
Healthy bone marrow	10.6597
Healthy bone marrow	9.83005
Healthy bone marrow	10.424
Healthy bone marrow	10.0467
Healthy bone marrow	10.1858
Healthy bone marrow	9.52977
Healthy bone marrow	10.6453
Healthy bone marrow	10.3722
Healthy bone marrow	9.30661
Healthy bone marrow	10.6186
Healthy bone marrow	10.5815
Healthy bone marrow	10.254
Healthy bone marrow	10.3956
Healthy bone marrow	10.3407
Healthy bone marrow	9.72468
Healthy bone marrow	7.63918
Healthy bone marrow	10.5795
Healthy bone marrow	10.5336
Healthy bone marrow	10.0719
Healthy bone marrow	9.33479
Healthy bone marrow	10.647
Healthy bone marrow	10.1618
Healthy bone marrow	10.4444
Healthy bone marrow	9.99087
Healthy bone marrow	10.4323
Healthy bone marrow	10.401
Healthy bone marrow	9.88688
Healthy bone marrow	10.6818
Healthy bone marrow	9.61826
Healthy bone marrow	9.91072
Healthy bone marrow	9.17558
Healthy bone marrow	10.2334
Healthy bone marrow	7.50917
Healthy bone marrow	10.4146
Healthy bone marrow	9.02746
Healthy bone marrow	9.21291
Healthy bone marrow	8.2416
Healthy bone marrow	8.70269
Healthy bone marrow	10.7056
Healthy bone marrow	9.62838
Healthy bone marrow	9.46502
Healthy bone marrow	10.5532
AML t(15;17)	9.87843
AML t(15;17)	10.0974
AML t(15;17)	10.0012
AML t(15;17)	9.57648
AML t(15;17)	9.86222
AML t(15;17)	9.11461
AML t(15;17)	10.3536
AML t(15;17)	9.64131
AML t(15;17)	9.14737
AML t(15;17)	9.1481
AML t(15;17)	9.29328
AML t(15;17)	10.3553
AML t(15;17)	9.87224
AML t(15;17)	9.68401
AML t(15;17)	10.2395
AML t(15;17)	10.6192
AML t(15;17)	8.74911
AML t(15;17)	10.1848
AML t(15;17)	8.89317
AML t(15;17)	8.37137
AML t(15;17)	9.32769
AML t(15;17)	8.40918
AML t(15;17)	10.5967
AML t(15;17)	10.508
AML t(15;17)	10.0527
AML t(15;17)	8.10541
AML t(15;17)	9.23478
AML t(15;17)	8.70817
AML t(15;17)	10.9916
AML t(15;17)	9.99676
AML t(15;17)	10.8694
AML t(15;17)	10.6804
AML t(15;17)	10.2198
AML t(15;17)	8.27713
AML t(15;17)	10.9284
AML t(15;17)	11.1933
AML t(15;17)	9.25362
AML t(8;21)	11.5197
AML t(8;21)	9.89727
AML t(8;21)	11.0466
AML t(8;21)	10.1813
AML t(8;21)	9.80783
AML t(8;21)	9.74638
AML t(8;21)	10.8582
AML t(8;21)	10.2665
AML t(8;21)	11.1421
AML t(8;21)	8.42933
AML t(8;21)	11.3583
AML t(8;21)	10.3632
AML t(8;21)	9.81919
AML t(8;21)	10.5141
AML t(8;21)	10.0298
AML t(8;21)	9.40803
AML t(8;21)	8.45504
AML t(8;21)	11.343
AML t(8;21)	8.23745
AML t(8;21)	9.8562
AML t(8;21)	10.3927
AML t(8;21)	8.70101
AML t(8;21)	9.96566
AML t(8;21)	10.279
AML t(8;21)	10.3337
AML t(8;21)	9.32654
AML t(8;21)	10.995
AML t(8;21)	9.64802
AML t(8;21)	11.1245
AML t(8;21)	11.0782
AML t(8;21)	10.9139
AML t(8;21)	9.83102
AML t(8;21)	10.889
AML t(8;21)	11.4539
AML t(8;21)	10.5183
AML t(8;21)	9.57291
AML t(8;21)	9.45151
AML t(8;21)	9.54802
AML t(8;21)	9.9246
AML t(8;21)	9.85602
AML MLL	10.8943
AML MLL	10.1371
AML MLL	9.61478
AML MLL	8.88691
AML MLL	11.3408
AML MLL	8.38868
AML MLL	11.3049
AML MLL	10.6243
AML MLL	10.4446
AML MLL	9.72891
AML MLL	10.8701
AML MLL	8.22646
AML MLL	10.0817
AML MLL	11.078
AML MLL	8.54857
AML MLL	11.1435
AML MLL	9.75945
AML MLL	8.77094
AML MLL	10.7883
AML MLL	9.13172
AML MLL	9.85085
AML MLL	11.4077
AML MLL	11.3381
AML MLL	10.3371
AML MLL	11.1122
AML MLL	10.5438
AML MLL	11.0419
AML MLL	10.5163
AML MLL	9.34051
AML MLL	10.0523
AML MLL	10.5015
AML MLL	10.5843
AML MLL	10.9976
AML MLL	9.29685
AML MLL	11.186
AML MLL	10.8063
AML MLL	10.3546
AML MLL	10.2121

## Sheet: TSC22D4 expression
TSC22D4 (log2)	208104_s_at
AML normal karyotype.	5.59793
AML normal karyotype.	6.2953
AML normal karyotype.	6.47206
AML normal karyotype.	7.11151
AML normal karyotype.	6.05763
AML normal karyotype.	6.86991
AML normal karyotype.	6.84377
AML normal karyotype.	6.77029
AML normal karyotype.	6.82448
AML normal karyotype.	5.80536
AML normal karyotype.	6.02429
AML normal karyotype.	6.40876
AML normal karyotype.	7.14924
AML normal karyotype.	6.33243
AML normal karyotype.	6.34318
AML normal karyotype.	6.91272
AML normal karyotype.	5.74542
AML normal karyotype.	6.95067
AML normal karyotype.	5.93558
AML normal karyotype.	6.52146
AML normal karyotype.	6.68769
AML normal karyotype.	5.85014
AML normal karyotype.	6.29384
AML normal karyotype.	7.27727
AML normal karyotype.	6.4513
AML normal karyotype.	6.56654
AML normal karyotype.	5.86512
AML normal karyotype.	5.99765
AML normal karyotype.	6.24941
AML normal karyotype.	6.13005
AML normal karyotype.	7.64151
AML normal karyotype.	5.99497
AML normal karyotype.	5.78113
AML normal karyotype.	6.06229
AML normal karyotype.	5.98427
AML normal karyotype.	6.77646
AML normal karyotype.	5.53486
AML normal karyotype.	6.63674
AML normal karyotype.	5.92993
AML normal karyotype.	6.70622
AML normal karyotype.	6.50024
AML normal karyotype.	7.31075
AML normal karyotype.	6.25828
AML normal karyotype.	6.69916
AML normal karyotype.	5.48662
AML normal karyotype.	6.99027
AML normal karyotype.	6.47335
AML normal karyotype.	5.72292
AML normal karyotype.	6.39304
AML normal karyotype.	6.85744
AML normal karyotype.	6.15707
AML normal karyotype.	6.93972
AML normal karyotype.	6.74328
AML normal karyotype.	6.72844
AML normal karyotype.	6.28835
AML normal karyotype.	6.34008
AML normal karyotype.	6.31571
AML normal karyotype.	6.44361
AML normal karyotype.	5.73898
AML normal karyotype.	6.2621
AML normal karyotype.	7.0216
AML normal karyotype.	6.20483
AML normal karyotype.	6.05838
AML normal karyotype.	5.86318
AML normal karyotype.	6.92731
AML normal karyotype.	6.59501
AML normal karyotype.	6.8958
AML normal karyotype.	6.38052
AML normal karyotype.	6.71871
AML normal karyotype.	6.6555
AML normal karyotype.	6.74281
AML normal karyotype.	6.57755
AML normal karyotype.	6.45331
AML normal karyotype.	6.31264
AML normal karyotype.	6.28216
AML normal karyotype.	5.80614
AML normal karyotype.	6.74226
AML normal karyotype.	6.04001
AML normal karyotype.	6.09611
AML normal karyotype.	7.20863
AML normal karyotype.	6.42502
AML normal karyotype.	5.33347
AML normal karyotype.	6.37571
AML normal karyotype.	6.82753
AML normal karyotype.	6.30431
AML normal karyotype.	6.68987
AML normal karyotype.	5.42961
AML normal karyotype.	7.34516
AML normal karyotype.	6.29968
AML normal karyotype.	7.16111
AML normal karyotype.	6.28415
AML normal karyotype.	6.52472
AML normal karyotype.	6.46106
AML normal karyotype.	5.71764
AML normal karyotype.	6.74117
AML normal karyotype.	6.98597
AML normal karyotype.	6.81705
AML normal karyotype.	6.52041
AML normal karyotype.	6.54828
AML normal karyotype.	6.09914
AML normal karyotype.	6.31817
AML normal karyotype.	5.53775
AML normal karyotype.	5.72594
AML normal karyotype.	6.52905
AML normal karyotype.	7.38879
AML normal karyotype.	7.03693
AML normal karyotype.	6.27482
AML normal karyotype.	7.37532
AML normal karyotype.	6.68884
AML normal karyotype.	6.20235
AML normal karyotype.	5.75858
AML normal karyotype.	6.76089
AML normal karyotype.	6.21157
AML normal karyotype.	6.47819
AML normal karyotype.	6.20288
AML normal karyotype.	6.64258
AML normal karyotype.	6.43927
AML normal karyotype.	7.1557
AML normal karyotype.	5.95174
AML normal karyotype.	7.00795
AML normal karyotype.	5.48056
AML normal karyotype.	6.76063
AML normal karyotype.	6.52839
AML normal karyotype.	6.25333
AML normal karyotype.	6.94221
AML normal karyotype.	6.25947
AML normal karyotype.	6.73131
AML normal karyotype.	7.50381
AML normal karyotype.	6.67476
AML normal karyotype.	7.58677
AML normal karyotype.	6.70196
AML normal karyotype.	6.5462
AML normal karyotype.	6.238
AML normal karyotype.	6.04017
AML normal karyotype.	6.07431
AML normal karyotype.	6.40239
AML normal karyotype.	6.61474
AML normal karyotype.	6.48253
AML normal karyotype.	5.88279
AML normal karyotype.	5.71106
AML normal karyotype.	6.28524
AML normal karyotype.	6.83485
AML normal karyotype.	6.21541
AML normal karyotype.	6.38966
AML normal karyotype.	6.67009
AML normal karyotype.	6.2763
AML normal karyotype.	7.18535
AML normal karyotype.	6.23549
AML normal karyotype.	6.02938
AML normal karyotype.	6.83032
AML normal karyotype.	6.35811
AML normal karyotype.	6.69136
AML normal karyotype.	6.45925
AML normal karyotype.	6.52625
AML normal karyotype.	7.18699
AML normal karyotype.	5.9682
AML normal karyotype.	6.15534
AML normal karyotype.	6.39257
AML normal karyotype.	6.07417
AML normal karyotype.	6.96086
AML normal karyotype.	6.49064
AML normal karyotype.	7.46305
AML normal karyotype.	6.18048
AML normal karyotype.	7.00557
AML normal karyotype.	6.50574
AML normal karyotype.	7.24724
AML normal karyotype.	6.21488
AML normal karyotype.	6.07652
AML normal karyotype.	7.48216
AML normal karyotype.	6.74764
AML normal karyotype.	6.48182
AML normal karyotype.	6.90994
AML normal karyotype.	6.3215
AML normal karyotype.	6.65246
AML normal karyotype.	6.16788
AML normal karyotype.	6.46459
AML normal karyotype.	6.35058
AML normal karyotype.	6.94536
AML normal karyotype.	6.3393
AML normal karyotype.	6.27826
AML normal karyotype.	6.20268
AML normal karyotype.	6.31169
AML normal karyotype.	6.10171
AML normal karyotype.	5.88988
AML normal karyotype.	7.14152
AML normal karyotype.	6.67146
AML normal karyotype.	6.09328
AML normal karyotype.	6.04349
AML normal karyotype.	6.35624
AML normal karyotype.	6.45132
AML normal karyotype.	6.1266
AML normal karyotype.	6.98146
AML normal karyotype.	5.83854
AML normal karyotype.	6.39799
AML normal karyotype.	6.37375
AML normal karyotype.	5.33675
AML normal karyotype.	6.48601
AML normal karyotype.	7.18917
AML normal karyotype.	6.19568
AML normal karyotype.	6.88386
AML normal karyotype.	6.58138
AML normal karyotype.	6.47524
AML normal karyotype.	7.24257
AML normal karyotype.	6.50177
AML normal karyotype.	6.70079
AML normal karyotype.	6.76557
AML normal karyotype.	6.40226
AML normal karyotype.	6.51174
AML normal karyotype.	6.18571
AML normal karyotype.	6.04051
AML normal karyotype.	7.08259
AML normal karyotype.	6.76418
AML normal karyotype.	6.41171
AML normal karyotype.	6.71868
AML normal karyotype.	6.47563
AML normal karyotype.	5.86932
AML normal karyotype.	6.5841
AML normal karyotype.	5.97516
AML normal karyotype.	6.96848
AML normal karyotype.	6.22845
AML normal karyotype.	6.35135
AML normal karyotype.	7.18205
AML normal karyotype.	6.11267
AML normal karyotype.	6.35136
AML normal karyotype.	6.29846
AML normal karyotype.	6.77913
AML normal karyotype.	6.52133
AML normal karyotype.	6.44477
AML normal karyotype.	6.11812
AML normal karyotype.	6.23053
AML normal karyotype.	6.60219
AML normal karyotype.	5.78554
AML normal karyotype.	6.30477
AML normal karyotype.	6.08094
AML normal karyotype.	6.74176
AML normal karyotype.	6.18548
AML normal karyotype.	6.81199
AML normal karyotype.	6.70459
AML normal karyotype.	5.39004
AML normal karyotype.	6.81674
AML normal karyotype.	6.21729
AML normal karyotype.	6.58144
AML normal karyotype.	6.51466
AML normal karyotype.	6.32694
AML normal karyotype.	6.63481
AML normal karyotype.	6.29843
AML normal karyotype.	6.57725
AML normal karyotype.	6.46846
AML normal karyotype.	6.13228
AML normal karyotype.	6.83117
AML normal karyotype.	5.94725
AML normal karyotype.	6.25318
AML normal karyotype.	6.46502
AML normal karyotype.	6.35641
AML normal karyotype.	6.17338
AML normal karyotype.	6.19457
AML normal karyotype.	6.59639
AML normal karyotype.	6.96997
AML normal karyotype.	6.61881
AML normal karyotype.	6.57769
AML normal karyotype.	6.93337
AML normal karyotype.	6.63446
AML normal karyotype.	6.54777
AML normal karyotype.	6.30201
AML normal karyotype.	6.55479
AML normal karyotype.	5.52675
AML normal karyotype.	6.83006
AML normal karyotype.	6.62004
AML normal karyotype.	6.02061
AML normal karyotype.	6.24605
AML normal karyotype.	7.84239
AML normal karyotype.	6.21238
AML normal karyotype.	5.98628
AML normal karyotype.	5.81349
AML normal karyotype.	6.3216
AML normal karyotype.	5.42023
AML normal karyotype.	6.98193
AML normal karyotype.	6.53141
AML normal karyotype.	5.9866
AML normal karyotype.	6.497
AML normal karyotype.	6.79469
AML normal karyotype.	6.6487
AML normal karyotype.	6.59601
AML normal karyotype.	6.16997
AML normal karyotype.	6.22476
AML normal karyotype.	6.70534
AML normal karyotype.	6.69877
AML normal karyotype.	7.13419
AML normal karyotype.	6.74249
AML normal karyotype.	6.28312
AML normal karyotype.	5.7176
AML normal karyotype.	7.14239
AML normal karyotype.	6.94177
AML normal karyotype.	6.3817
AML normal karyotype.	5.67595
AML normal karyotype.	6.8502
AML normal karyotype.	6.01853
AML normal karyotype.	6.35144
AML normal karyotype.	6.56519
AML normal karyotype.	6.68781
AML normal karyotype.	5.75357
AML normal karyotype.	6.85677
AML normal karyotype.	6.6576
AML normal karyotype.	6.72633
AML normal karyotype.	6.38644
AML normal karyotype.	6.57915
AML normal karyotype.	5.97229
AML normal karyotype.	6.72743
AML normal karyotype.	6.33028
AML normal karyotype.	6.80093
AML normal karyotype.	6.29544
AML normal karyotype.	6.16099
AML normal karyotype.	6.18324
AML normal karyotype.	7.1508
AML normal karyotype.	6.26133
AML normal karyotype.	6.89555
AML normal karyotype.	6.62075
AML normal karyotype.	6.88623
AML normal karyotype.	6.89307
AML normal karyotype.	6.97387
AML normal karyotype.	7.13052
AML normal karyotype.	6.37335
AML normal karyotype.	6.55737
AML normal karyotype.	7.31189
AML normal karyotype.	7.32003
AML normal karyotype.	6.85784
AML normal karyotype.	6.33063
AML normal karyotype.	5.7741
AML normal karyotype.	6.96322
AML normal karyotype.	6.74256
AML normal karyotype.	6.11448
AML normal karyotype.	7.02148
AML normal karyotype.	6.53799
AML normal karyotype.	6.04648
AML normal karyotype.	6.32024
AML normal karyotype.	6.44482
AML normal karyotype.	6.36186
AML normal karyotype.	6.2739
AML normal karyotype.	6.2161
AML normal karyotype.	6.58488
AML normal karyotype.	6.34454
AML normal karyotype.	6.70812
AML normal karyotype.	7.1347
AML normal karyotype.	6.42094
AML normal karyotype.	6.28742
AML normal karyotype.	6.26751
AML normal karyotype.	6.75125
AML normal karyotype.	6.31525
AML normal karyotype.	5.4255
AML normal karyotype.	6.76212
AML normal karyotype.	6.62788
AML complex.	6.88525
AML complex.	6.72632
AML complex.	6.39901
AML complex.	6.3949
AML complex.	6.53799
AML complex.	6.00425
AML complex.	6.26561
AML complex.	7.13627
AML complex.	6.24478
AML complex.	6.2082
AML complex.	6.21965
AML complex.	7.11105
AML complex.	6.02732
AML complex.	6.33809
AML complex.	6.19283
AML complex.	5.90933
AML complex.	6.3908
AML complex.	7.12676
AML complex.	7.41716
AML complex.	7.16743
AML complex.	5.95217
AML complex.	6.55175
AML complex.	5.88035
AML complex.	7.01988
AML complex.	6.54251
AML complex.	6.31131
AML complex.	6.45152
AML complex.	6.22331
AML complex.	6.14906
AML complex.	6.46382
AML complex.	6.46056
AML complex.	6.15767
AML complex.	5.35054
AML complex.	6.37069
AML complex.	6.72536
AML complex.	7.53341
AML complex.	6.33998
AML complex.	6.16231
AML complex.	6.08799
AML complex.	5.85529
AML complex.	6.86684
AML complex.	6.9249
AML complex.	6.20683
AML complex.	6.94768
AML complex.	6.33936
AML complex.	6.12412
AML complex.	5.7262
AML complex.	6.68421
AML inv(16)	6.26052
AML inv(16)	6.09245
AML inv(16)	6.81703
AML inv(16)	6.92006
AML inv(16)	6.41312
AML inv(16)	6.54859
AML inv(16)	6.32845
AML inv(16)	6.51537
AML inv(16)	6.32199
AML inv(16)	6.35227
AML inv(16)	6.30998
AML inv(16)	6.4083
AML inv(16)	6.93012
AML inv(16)	7.39888
AML inv(16)	6.78636
AML inv(16)	6.49009
AML inv(16)	6.31434
AML inv(16)	6.15298
AML inv(16)	6.07857
AML inv(16)	6.74238
AML inv(16)	6.38172
AML inv(16)	6.45058
AML inv(16)	5.68087
AML inv(16)	6.35975
AML inv(16)	7.34653
AML inv(16)	6.44639
AML inv(16)	6.4041
AML inv(16)	6.36004
Healthy bone marrow	6.36626
Healthy bone marrow	6.81434
Healthy bone marrow	6.41193
Healthy bone marrow	6.59509
Healthy bone marrow	6.71021
Healthy bone marrow	6.35112
Healthy bone marrow	6.69669
Healthy bone marrow	6.58196
Healthy bone marrow	6.23151
Healthy bone marrow	6.60125
Healthy bone marrow	5.71602
Healthy bone marrow	6.79034
Healthy bone marrow	6.86698
Healthy bone marrow	6.00453
Healthy bone marrow	6.05754
Healthy bone marrow	6.79498
Healthy bone marrow	6.47191
Healthy bone marrow	6.28106
Healthy bone marrow	6.71212
Healthy bone marrow	5.99958
Healthy bone marrow	6.72124
Healthy bone marrow	6.47779
Healthy bone marrow	6.24358
Healthy bone marrow	6.40337
Healthy bone marrow	6.37034
Healthy bone marrow	6.18707
Healthy bone marrow	6.28903
Healthy bone marrow	6.65041
Healthy bone marrow	6.61815
Healthy bone marrow	5.89071
Healthy bone marrow	6.4092
Healthy bone marrow	6.33066
Healthy bone marrow	6.02667
Healthy bone marrow	6.24594
Healthy bone marrow	6.53102
Healthy bone marrow	6.24676
Healthy bone marrow	6.20324
Healthy bone marrow	7.41853
Healthy bone marrow	6.29525
Healthy bone marrow	6.48626
Healthy bone marrow	6.30052
Healthy bone marrow	6.35364
Healthy bone marrow	6.82381
Healthy bone marrow	6.07267
Healthy bone marrow	6.46028
Healthy bone marrow	6.72655
Healthy bone marrow	5.85657
Healthy bone marrow	7.42774
Healthy bone marrow	6.5993
Healthy bone marrow	6.36239
Healthy bone marrow	6.26707
Healthy bone marrow	7.13611
Healthy bone marrow	6.57208
Healthy bone marrow	6.59577
Healthy bone marrow	6.07344
Healthy bone marrow	6.90886
Healthy bone marrow	6.19105
Healthy bone marrow	6.07676
Healthy bone marrow	6.3576
Healthy bone marrow	6.78263
Healthy bone marrow	6.5243
Healthy bone marrow	6.47998
Healthy bone marrow	6.18983
Healthy bone marrow	6.52735
Healthy bone marrow	5.65931
Healthy bone marrow	6.3781
Healthy bone marrow	6.66923
Healthy bone marrow	6.32669
Healthy bone marrow	6.70741
Healthy bone marrow	6.57769
Healthy bone marrow	6.29717
Healthy bone marrow	6.40538
Healthy bone marrow	7.16076
AML t(15;17)	6.37315
AML t(15;17)	6.48419
AML t(15;17)	7.03159
AML t(15;17)	5.99766
AML t(15;17)	6.38781
AML t(15;17)	5.91003
AML t(15;17)	6.56655
AML t(15;17)	6.61369
AML t(15;17)	5.91497
AML t(15;17)	6.21744
AML t(15;17)	6.85757
AML t(15;17)	6.94074
AML t(15;17)	6.30371
AML t(15;17)	6.28821
AML t(15;17)	6.60591
AML t(15;17)	6.99346
AML t(15;17)	6.69846
AML t(15;17)	6.56557
AML t(15;17)	6.03208
AML t(15;17)	5.66258
AML t(15;17)	5.72728
AML t(15;17)	7.01496
AML t(15;17)	7.13831
AML t(15;17)	6.7985
AML t(15;17)	5.23283
AML t(15;17)	6.17011
AML t(15;17)	5.44772
AML t(15;17)	5.84863
AML t(15;17)	6.47002
AML t(15;17)	7.01377
AML t(15;17)	6.72603
AML t(15;17)	6.33105
AML t(15;17)	6.56211
AML t(15;17)	6.57885
AML t(15;17)	6.34071
AML t(15;17)	6.92433
AML t(15;17)	6.17824
AML t(8;21)	7.17623
AML t(8;21)	6.6079
AML t(8;21)	6.89575
AML t(8;21)	6.79376
AML t(8;21)	6.16268
AML t(8;21)	6.35354
AML t(8;21)	6.49946
AML t(8;21)	6.39986
AML t(8;21)	6.62156
AML t(8;21)	6.08957
AML t(8;21)	6.78971
AML t(8;21)	6.18659
AML t(8;21)	5.93909
AML t(8;21)	5.92018
AML t(8;21)	6.25601
AML t(8;21)	6.36284
AML t(8;21)	6.32985
AML t(8;21)	6.13568
AML t(8;21)	6.52372
AML t(8;21)	6.49508
AML t(8;21)	5.54181
AML t(8;21)	6.08522
AML t(8;21)	6.19544
AML t(8;21)	6.36044
AML t(8;21)	6.52355
AML t(8;21)	6.54863
AML t(8;21)	6.91676
AML t(8;21)	7.38524
AML t(8;21)	6.89273
AML t(8;21)	6.90535
AML t(8;21)	7.33975
AML t(8;21)	7.05384
AML t(8;21)	6.37488
AML t(8;21)	6.77176
AML t(8;21)	7.25456
AML t(8;21)	6.13383
AML t(8;21)	6.79724
AML t(8;21)	5.82318
AML t(8;21)	6.90476
AML t(8;21)	5.77513
AML MLL	6.38016
AML MLL	6.56934
AML MLL	7.2218
AML MLL	6.67562
AML MLL	6.67985
AML MLL	6.73563
AML MLL	7.14478
AML MLL	6.61249
AML MLL	6.33478
AML MLL	6.41769
AML MLL	6.55425
AML MLL	5.82473
AML MLL	6.98637
AML MLL	7.03178
AML MLL	7.27351
AML MLL	6.48604
AML MLL	6.66315
AML MLL	6.77636
AML MLL	6.67163
AML MLL	7.04205
AML MLL	5.54821
AML MLL	6.49045
AML MLL	6.60139
AML MLL	4.9829
AML MLL	6.61401
AML MLL	6.52216
AML MLL	5.64584
AML MLL	6.83536
AML MLL	6.78034
AML MLL	6.58926
AML MLL	6.86677
AML MLL	7.19811
AML MLL	6.20614
AML MLL	6.63606
AML MLL	6.53025
AML MLL	6.68431
AML MLL	5.74985
AML MLL	6.34507
