# Supplementary material for: Comprehensive bioinformatic analysis of the expression and prognostic significance of TSC22D domain family genes in acute myeloid leukemia
Source: Research Square preprint supplement (doi:10.21203/rs.3.rs-1209284/v1), 2022-01-14
Supplement: Supplementary file 6 [file c17be4bb2d32383e39d91c49.xlsx]

## Sheet: ENCORI  database
miRNAid	miRNAname	geneID	geneName	geneType	chromosome	narrowStart	narrowEnd	broadStart	broadEnd	strand	clipExpNum	degraExpNum	RBP	PITA	RNA22	miRmap	microT	miRanda	PicTar	TargetScan	pancancerNum
MIMAT0000062	hsa-let-7a-5p	ENSG00000157514	TSC22D3	protein_coding	chrX	106956990	106956995	106956990	106956995	-	11	0	AGO1,AGO1-4,AGO2	1	0	0	0	0	0	0	3
MIMAT0000063	hsa-let-7b-5p	ENSG00000157514	TSC22D3	protein_coding	chrX	106956990	106956995	106956990	106956995	-	11	0	AGO1,AGO1-4,AGO2	1	0	0	0	0	0	0	1
MIMAT0000064	hsa-let-7c-5p	ENSG00000157514	TSC22D3	protein_coding	chrX	106956990	106956995	106956990	106956995	-	11	0	AGO1,AGO1-4,AGO2	1	0	0	0	0	0	0	2
MIMAT0000065	hsa-let-7d-5p	ENSG00000157514	TSC22D3	protein_coding	chrX	106956990	106956995	106956990	106956995	-	11	0	AGO1,AGO1-4,AGO2	1	0	0	0	0	0	0	7
MIMAT0000066	hsa-let-7e-5p	ENSG00000157514	TSC22D3	protein_coding	chrX	106956990	106956997	106956990	106956997	-	11	0	AGO1,AGO1-4,AGO2	1	0	0	0	0	0	0	2
MIMAT0000067	hsa-let-7f-5p	ENSG00000157514	TSC22D3	protein_coding	chrX	106956990	106956995	106956990	106956995	-	11	0	AGO1,AGO1-4,AGO2	1	0	0	0	0	0	0	2
MIMAT0000414	hsa-let-7g-5p	ENSG00000157514	TSC22D3	protein_coding	chrX	106956990	106956995	106956990	106956995	-	11	0	AGO1,AGO1-4,AGO2	1	0	0	0	0	0	0	8
MIMAT0000415	hsa-let-7i-5p	ENSG00000157514	TSC22D3	protein_coding	chrX	106956990	106956995	106956990	106956995	-	11	0	AGO1,AGO1-4,AGO2	1	0	0	0	0	0	0	1
MIMAT0000099	hsa-miR-101-3p	ENSG00000157514	TSC22D3	protein_coding	chrX	106956658	106956663	106956658	106956663	-	7	0	AGO1,AGO1-4,AGO2	1	0	0	0	0	0	0	1
MIMAT0000101	hsa-miR-103a-3p	ENSG00000157514	TSC22D3	protein_coding	chrX	106956861	106956863	106956858	106956866	-	13	0	AGO1-4,AGO2	2	0	0	0	0	1	0	8
MIMAT0000102	hsa-miR-105-5p	ENSG00000157514	TSC22D3	protein_coding	chrX	106956731	106956736	106956731	106956736	-	7	0	AGO1-4	1	0	0	0	0	0	0	7
MIMAT0000103	hsa-miR-106a-5p	ENSG00000157514	TSC22D3	protein_coding	chrX	106956559	106956564	106956559	106956564	-	12	0	AGO1,AGO1-4,AGO2	1	0	0	0	0	0	0	10
MIMAT0000680	hsa-miR-106b-5p	ENSG00000157514	TSC22D3	protein_coding	chrX	106956559	106956564	106956559	106956564	-	12	0	AGO1,AGO1-4,AGO2	1	0	0	0	0	0	0	16
MIMAT0000104	hsa-miR-107	ENSG00000157514	TSC22D3	protein_coding	chrX	106956861	106956863	106956858	106956866	-	13	0	AGO1-4,AGO2	2	0	0	0	0	1	0	7
MIMAT0005824	hsa-miR-1179	ENSG00000157514	TSC22D3	protein_coding	chrX	106957502	106957507	106957502	106957507	-	1	0	AGO2	1	0	0	0	0	0	0	1
MIMAT0005955	hsa-miR-1197	ENSG00000157514	TSC22D3	protein_coding	chrX	106956663	106956669	106956662	106956690	-	10	1	AGO1,AGO1-4,AGO2	1	0	0	1	0	0	0	1
MIMAT0000422	hsa-miR-124-3p	ENSG00000157514	TSC22D3	protein_coding	chrX	106956866	106956871	106956866	106956871	-	11	0	AGO1-4,AGO2	1	0	0	0	0	0	0	4
MIMAT0000443	hsa-miR-125a-5p	ENSG00000157514	TSC22D3	protein_coding	chrX	106957730	106957748	106957730	106957748	-	3	0	AGO1,AGO1-4,AGO2	0	0	0	0	1	0	0	3
MIMAT0000423	hsa-miR-125b-5p	ENSG00000157514	TSC22D3	protein_coding	chrX	106957730	106957748	106957730	106957748	-	3	0	AGO1,AGO1-4,AGO2	0	0	0	0	1	0	0	2
MIMAT0005924	hsa-miR-1270	ENSG00000157514	TSC22D3	protein_coding	chrX	106957380	106957386	106957380	106957386	-	4	0	AGO1-4,AGO2	1	0	1	0	0	0	0	5
MIMAT0005796	hsa-miR-1271-5p	ENSG00000157514	TSC22D3	protein_coding	chrX	106956806	106956811	106956805	106956833	-	22	0	AGO1-4,AGO2	1	0	0	1	0	1	0	4
MIMAT0000424	hsa-miR-128-3p	ENSG00000157514	TSC22D3	protein_coding	chrX	106956967	106956972	106956966	106956986	-	7	0	AGO1,AGO1-4,AGO2	1	0	0	0	1	0	0	8
MIMAT0004548	hsa-miR-129-1-3p	ENSG00000157514	TSC22D3	protein_coding	chrX	106957087	106957093	106957087	106957093	-	4	0	AGO1,AGO2	0	0	0	0	0	1	0	4
MIMAT0004605	hsa-miR-129-2-3p	ENSG00000157514	TSC22D3	protein_coding	chrX	106957088	106957093	106957087	106957093	-	4	0	AGO1,AGO2	1	0	0	0	0	1	0	3
MIMAT0005885	hsa-miR-1295a	ENSG00000157514	TSC22D3	protein_coding	chrX	106957532	106957537	106957532	106957537	-	2	0	AGO2	1	0	0	0	0	0	0	0
MIMAT0005797	hsa-miR-1301-3p	ENSG00000157514	TSC22D3	protein_coding	chrX	106959988	106960016	106959988	106960016	-	5	0	AGO1,AGO1-4,AGO2	0	0	0	1	0	0	0	10
MIMAT0022726	hsa-miR-1306-5p	ENSG00000157514	TSC22D3	protein_coding	chrX	106956606	106956612	106956606	106956612	-	11	0	AGO1,AGO1-4,AGO2	0	0	1	0	0	0	0	10
MIMAT0005795	hsa-miR-1323	ENSG00000157514	TSC22D3	protein_coding	chrX	106956814	106956819	106956813	106956841	-	18	0	AGO1-4,AGO2	1	0	1	1	0	0	0	2
MIMAT0000426	hsa-miR-132-3p	ENSG00000157514	TSC22D3	protein_coding	chrX	106957343	106957348	106957342	106957363	-	4	0	AGO1-4,AGO2	1	0	0	0	1	1	0	2
MIMAT0004594	hsa-miR-132-5p	ENSG00000157514	TSC22D3	protein_coding	chrX	106956873	106956879	106956873	106956879	-	8	0	AGO1-4,AGO2	0	0	1	0	0	0	0	1
MIMAT0000428	hsa-miR-135a-5p	ENSG00000157514	TSC22D3	protein_coding	chrX	106957114	106957119	106957113	106957135	-	6	0	AGO1,AGO2	1	0	0	0	1	0	0	1
MIMAT0000758	hsa-miR-135b-5p	ENSG00000157514	TSC22D3	protein_coding	chrX	106957114	106957119	106957113	106957135	-	6	0	AGO1,AGO2	1	0	0	0	1	0	0	9
MIMAT0000448	hsa-miR-136-5p	ENSG00000157514	TSC22D3	protein_coding	chrX	106956617	106956623	106956617	106956623	-	9	0	AGO1,AGO1-4,AGO2	1	0	0	0	0	0	0	0
MIMAT0000430	hsa-miR-138-5p	ENSG00000157514	TSC22D3	protein_coding	chrX	106957019	106957024	106957019	106957024	-	7	0	AGO1-4,AGO2	1	0	0	0	0	0	0	2
MIMAT0000250	hsa-miR-139-5p	ENSG00000157514	TSC22D3	protein_coding	chrX	106956584	106956589	106956584	106956589	-	12	0	AGO1-4,AGO2	1	0	0	0	0	0	0	0
MIMAT0000435	hsa-miR-143-3p	ENSG00000157514	TSC22D3	protein_coding	chrX	106957661	106957667	106957660	106957688	-	3	0	AGO1,AGO1-4,AGO2	1	0	1	1	1	1	1	2
MIMAT0000436	hsa-miR-144-3p	ENSG00000157514	TSC22D3	protein_coding	chrX	106956658	106956663	106956658	106956663	-	7	0	AGO1,AGO1-4,AGO2	1	0	0	0	0	0	0	6
MIMAT0000450	hsa-miR-149-5p	ENSG00000157514	TSC22D3	protein_coding	chrX	106957517	106957522	106957517	106957522	-	1	0	AGO2	1	0	0	0	0	0	0	4
MIMAT0000451	hsa-miR-150-5p	ENSG00000157514	TSC22D3	protein_coding	chrX	106957258	106957263	106957258	106957263	-	3	0	AGO1,AGO2	1	0	1	0	0	0	0	0
MIMAT0000068	hsa-miR-15a-5p	ENSG00000157514	TSC22D3	protein_coding	chrX	106956860	106956866	106956859	106956880	-	12	0	AGO1-4,AGO2	1	0	0	0	1	1	1	7
MIMAT0000417	hsa-miR-15b-5p	ENSG00000157514	TSC22D3	protein_coding	chrX	106956860	106956866	106956859	106956884	-	12	0	AGO1-4,AGO2	1	0	0	0	1	1	1	15
MIMAT0000069	hsa-miR-16-5p	ENSG00000157514	TSC22D3	protein_coding	chrX	106956860	106956866	106956859	106956880	-	12	0	AGO1-4,AGO2	1	0	0	0	1	1	1	10
MIMAT0000070	hsa-miR-17-5p	ENSG00000157514	TSC22D3	protein_coding	chrX	106956559	106956564	106956559	106956564	-	12	0	AGO1,AGO1-4,AGO2	1	0	0	0	0	0	0	16
MIMAT0000259	hsa-miR-182-5p	ENSG00000157514	TSC22D3	protein_coding	chrX	106957624	106957629	106957623	106957651	-	2	0	AGO1-4	1	0	0	1	0	0	0	18
MIMAT0000456	hsa-miR-186-5p	ENSG00000157514	TSC22D3	protein_coding	chrX	106957694	106957701	106957693	106957714	-	4	0	AGO1,AGO1-4,AGO2	1	0	0	0	1	0	0	8
MIMAT0000457	hsa-miR-188-5p	ENSG00000157514	TSC22D3	protein_coding	chrX	106956647	106956652	106956647	106956652	-	6	0	AGO1,AGO1-4,AGO2	1	0	0	0	0	0	0	10
MIMAT0000072	hsa-miR-18a-5p	ENSG00000157514	TSC22D3	protein_coding	chrX	106956542	106956547	106956541	106956564	-	14	0	AGO1,AGO1-4,AGO2	1	0	0	0	1	0	0	15
MIMAT0001412	hsa-miR-18b-5p	ENSG00000157514	TSC22D3	protein_coding	chrX	106956542	106956547	106956541	106956564	-	14	0	AGO1,AGO1-4,AGO2	1	0	0	0	1	0	0	4
MIMAT0007888	hsa-miR-1913	ENSG00000157514	TSC22D3	protein_coding	chrX	106957723	106957729	106957723	106957729	-	2	0	AGO1,AGO2	0	0	0	0	0	1	0	1
MIMAT0000459	hsa-miR-193a-3p	ENSG00000157514	TSC22D3	protein_coding	chrX	106957516	106957521	106957516	106957521	-	1	0	AGO2	1	0	0	0	0	0	0	5
MIMAT0002819	hsa-miR-193b-3p	ENSG00000157514	TSC22D3	protein_coding	chrX	106957516	106957521	106957515	106957543	-	2	0	AGO2	1	0	0	1	0	0	0	11
MIMAT0000461	hsa-miR-195-5p	ENSG00000157514	TSC22D3	protein_coding	chrX	106956860	106956866	106956859	106956878	-	12	0	AGO1-4,AGO2	1	0	0	0	1	1	1	2
MIMAT0000232	hsa-miR-199a-3p	ENSG00000157514	TSC22D3	protein_coding	chrX	106956659	106956664	106956659	106956664	-	7	0	AGO1,AGO1-4,AGO2	1	0	0	0	0	0	0	0
MIMAT0000231	hsa-miR-199a-5p	ENSG00000157514	TSC22D3	protein_coding	chrX	106956790	106956795	106956790	106956795	-	23	0	AGO1-4,AGO2	1	0	0	0	0	0	0	1
MIMAT0004563	hsa-miR-199b-3p	ENSG00000157514	TSC22D3	protein_coding	chrX	106956659	106956664	106956659	106956664	-	7	0	AGO1,AGO1-4,AGO2	1	0	0	0	0	0	0	0
MIMAT0000263	hsa-miR-199b-5p	ENSG00000157514	TSC22D3	protein_coding	chrX	106956790	106956795	106956790	106956795	-	23	0	AGO1-4,AGO2	1	0	0	0	0	0	0	1
MIMAT0000318	hsa-miR-200b-3p	ENSG00000157514	TSC22D3	protein_coding	chrX	106957138	106957143	106957138	106957143	-	4	0	AGO1,AGO1-4,AGO2	1	0	0	0	0	0	0	12
MIMAT0000617	hsa-miR-200c-3p	ENSG00000157514	TSC22D3	protein_coding	chrX	106957138	106957143	106957138	106957143	-	4	0	AGO1,AGO1-4,AGO2	1	0	0	0	0	0	0	17
MIMAT0000266	hsa-miR-205-5p	ENSG00000157514	TSC22D3	protein_coding	chrX	106957277	106957282	106957277	106957282	-	1	0	AGO2	1	0	0	0	0	0	0	5
MIMAT0000075	hsa-miR-20a-5p	ENSG00000157514	TSC22D3	protein_coding	chrX	106956559	106956564	106956559	106956564	-	12	0	AGO1,AGO1-4,AGO2	1	0	0	0	0	0	0	15
MIMAT0001413	hsa-miR-20b-5p	ENSG00000157514	TSC22D3	protein_coding	chrX	106956552	106956557	106956552	106956557	-	13	0	AGO1,AGO1-4,AGO2	1	0	0	0	0	0	0	4
MIMAT0000269	hsa-miR-212-3p	ENSG00000157514	TSC22D3	protein_coding	chrX	106957343	106957349	106957342	106957361	-	4	0	AGO1-4,AGO2	1	0	1	0	1	1	0	2
MIMAT0000273	hsa-miR-216a-5p	ENSG00000157514	TSC22D3	protein_coding	chrX	106957253	106957258	106957253	106957259	-	3	0	AGO1,AGO2	1	0	0	0	0	0	1	1
MIMAT0000275	hsa-miR-218-5p	ENSG00000157514	TSC22D3	protein_coding	chrX	106957635	106957640	106957635	106957640	-	2	0	AGO1-4	1	0	0	0	0	0	0	1
MIMAT0000278	hsa-miR-221-3p	ENSG00000157514	TSC22D3	protein_coding	chrX	106957067	106957072	106957066	106957089	-	6	0	AGO1,AGO1-4,AGO2	1	0	1	0	1	0	0	6
MIMAT0000279	hsa-miR-222-3p	ENSG00000157514	TSC22D3	protein_coding	chrX	106957067	106957072	106957066	106957094	-	6	0	AGO1,AGO1-4,AGO2	1	0	1	1	1	0	0	10
MIMAT0000080	hsa-miR-24-3p	ENSG00000157514	TSC22D3	protein_coding	chrX	106957810	106957838	106957810	106957838	-	2	1	AGO1-4	0	0	0	1	0	0	0	8
MIMAT0004679	hsa-miR-296-3p	ENSG00000157514	TSC22D3	protein_coding	chrX	106956852	106956858	106956851	106956876	-	15	0	AGO1-4,AGO2	1	0	0	0	1	0	0	9
MIMAT0000086	hsa-miR-29a-3p	ENSG00000157514	TSC22D3	protein_coding	chrX	106956786	106956792	106956785	106956803	-	23	0	AGO1-4,AGO2	1	0	1	0	1	1	1	3
MIMAT0000100	hsa-miR-29b-3p	ENSG00000157514	TSC22D3	protein_coding	chrX	106956786	106956792	106956785	106956806	-	24	0	AGO1-4,AGO2	1	0	0	0	1	1	1	7
MIMAT0000681	hsa-miR-29c-3p	ENSG00000157514	TSC22D3	protein_coding	chrX	106956786	106956792	106956785	106956803	-	23	0	AGO1-4,AGO2	1	0	0	0	1	1	1	1
MIMAT0015023	hsa-miR-3150a-3p	ENSG00000157514	TSC22D3	protein_coding	chrX	106957672	106957678	106957671	106957699	-	3	0	AGO1,AGO1-4,AGO2	0	0	1	1	0	1	0	1
MIMAT0018194	hsa-miR-3150b-3p	ENSG00000157514	TSC22D3	protein_coding	chrX	106957289	106957309	106957289	106957309	-	1	0	AGO1-4	0	1	0	0	0	0	0	2
MIMAT0015069	hsa-miR-3187-3p	ENSG00000157514	TSC22D3	protein_coding	chrX	106957601	106957607	106957601	106957607	-	1	0	AGO1-4	0	0	1	0	0	0	0	6
MIMAT0019218	hsa-miR-3194-3p	ENSG00000157514	TSC22D3	protein_coding	chrX	106957721	106957727	106957720	106957748	-	3	0	AGO1,AGO1-4,AGO2	0	0	1	1	0	0	0	2
MIMAT0000510	hsa-miR-320a	ENSG00000157514	TSC22D3	protein_coding	chrX	106957175	106957181	106957174	106957199	-	16	0	AGO1,AGO1-4,AGO2	1	0	0	0	1	1	1	6
MIMAT0005792	hsa-miR-320b	ENSG00000157514	TSC22D3	protein_coding	chrX	106957175	106957180	106957174	106957199	-	16	0	AGO1,AGO1-4,AGO2	1	0	0	0	1	1	1	8
MIMAT0005793	hsa-miR-320c	ENSG00000157514	TSC22D3	protein_coding	chrX	106957175	106957181	106957174	106957193	-	14	0	AGO1,AGO1-4,AGO2	1	0	0	0	1	1	1	4
MIMAT0006764	hsa-miR-320d	ENSG00000157514	TSC22D3	protein_coding	chrX	106957175	106957180	106957174	106957192	-	14	0	AGO1,AGO1-4,AGO2	1	0	0	0	1	1	1	4
MIMAT0000762	hsa-miR-324-3p	ENSG00000157514	TSC22D3	protein_coding	chrX	106957724	106957729	106957723	106957729	-	2	0	AGO1,AGO2	1	0	0	0	0	1	0	11
MIMAT0000761	hsa-miR-324-5p	ENSG00000157514	TSC22D3	protein_coding	chrX	106956869	106956874	106956869	106956874	-	9	0	AGO1-4,AGO2	1	0	0	0	0	0	0	9
MIMAT0000752	hsa-miR-328-3p	ENSG00000157514	TSC22D3	protein_coding	chrX	106956893	106956900	106956893	106956900	-	2	0	AGO1-4	1	0	0	0	0	0	0	5
MIMAT0000751	hsa-miR-330-3p	ENSG00000157514	TSC22D3	protein_coding	chrX	106957204	106957209	106957203	106957231	-	16	0	AGO1,AGO1-4,AGO2	1	0	1	1	0	0	0	3
MIMAT0000760	hsa-miR-331-3p	ENSG00000157514	TSC22D3	protein_coding	chrX	106957271	106957276	106957271	106957276	-	1	0	AGO2	1	0	0	0	0	0	0	15
MIMAT0000091	hsa-miR-33a-5p	ENSG00000157514	TSC22D3	protein_coding	chrX	106957212	106957219	106957212	106957219	-	16	0	AGO1,AGO1-4,AGO2	1	0	0	0	0	0	0	12
MIMAT0003301	hsa-miR-33b-5p	ENSG00000157514	TSC22D3	protein_coding	chrX	106957212	106957217	106957212	106957217	-	16	0	AGO1,AGO1-4,AGO2	1	0	0	0	0	0	0	11
MIMAT0000772	hsa-miR-345-5p	ENSG00000157514	TSC22D3	protein_coding	chrX	106957241	106957246	106957241	106957246	-	4	0	AGO1,AGO1-4,AGO2	1	0	0	0	0	0	0	15
MIMAT0000705	hsa-miR-362-5p	ENSG00000157514	TSC22D3	protein_coding	chrX	106956671	106956676	106956671	106956676	-	5	1	AGO1,AGO1-4,AGO2	1	0	0	0	0	0	0	5
MIMAT0018108	hsa-miR-3681-5p	ENSG00000157514	TSC22D3	protein_coding	chrX	106957588	106957616	106957588	106957616	-	1	0	AGO1-4	0	0	0	1	0	0	0	2
MIMAT0000722	hsa-miR-370-3p	ENSG00000157514	TSC22D3	protein_coding	chrX	106957561	106957566	106957561	106957566	-	1	0	AGO2	1	0	0	0	0	0	0	3
MIMAT0000728	hsa-miR-375	ENSG00000157514	TSC22D3	protein_coding	chrX	106956641	106956648	106956641	106956648	-	8	0	AGO1,AGO1-4,AGO2	1	0	0	0	0	0	0	9
MIMAT0000729	hsa-miR-376a-3p	ENSG00000157514	TSC22D3	protein_coding	chrX	106957336	106957341	106957336	106957341	-	3	0	AGO1-4,AGO2	1	0	0	0	0	0	0	4
MIMAT0002172	hsa-miR-376b-3p	ENSG00000157514	TSC22D3	protein_coding	chrX	106957336	106957341	106957336	106957341	-	3	0	AGO1-4,AGO2	1	0	0	0	0	0	0	2
MIMAT0018937	hsa-miR-378g	ENSG00000157514	TSC22D3	protein_coding	chrX	106957843	106957871	106957843	106957871	-	1	0	AGO1-4	0	0	0	1	0	0	0	2
MIMAT0000737	hsa-miR-382-5p	ENSG00000157514	TSC22D3	protein_coding	chrX	106957466	106957471	106957465	106957471	-	2	0	AGO2	1	0	0	0	0	1	0	2
MIMAT0018199	hsa-miR-3924	ENSG00000157514	TSC22D3	protein_coding	chrX	106957054	106957082	106957054	106957082	-	9	1	AGO1,AGO1-4,AGO2	0	0	0	1	0	0	0	1
MIMAT0003339	hsa-miR-421	ENSG00000157514	TSC22D3	protein_coding	chrX	106957033	106957038	106957032	106957038	-	11	0	AGO1,AGO1-4,AGO2	1	0	0	0	0	1	0	8
MIMAT0001341	hsa-miR-424-5p	ENSG00000157514	TSC22D3	protein_coding	chrX	106956860	106956866	106956859	106956880	-	12	0	AGO1-4,AGO2	1	0	0	0	1	1	1	5
MIMAT0003393	hsa-miR-425-5p	ENSG00000157514	TSC22D3	protein_coding	chrX	106956734	106956740	106956733	106956755	-	9	0	AGO1-4,AGO2	1	0	0	0	1	0	0	13
MIMAT0001536	hsa-miR-429	ENSG00000157514	TSC22D3	protein_coding	chrX	106957138	106957143	106957138	106957143	-	4	0	AGO1,AGO1-4,AGO2	1	0	0	0	0	0	0	12
MIMAT0016870	hsa-miR-4319	ENSG00000157514	TSC22D3	protein_coding	chrX	106957731	106957736	106957730	106957737	-	2	0	AGO1,AGO2	0	0	1	0	0	1	0	0
MIMAT0018944	hsa-miR-4429	ENSG00000157514	TSC22D3	protein_coding	chrX	106957175	106957180	106957174	106957181	-	13	0	AGO1,AGO1-4,AGO2	0	0	0	0	0	1	1	0
MIMAT0019694	hsa-miR-4637	ENSG00000157514	TSC22D3	protein_coding	chrX	106957140	106957168	106957140	106957168	-	9	0	AGO1,AGO1-4,AGO2	0	0	0	1	0	0	0	0
MIMAT0019853	hsa-miR-4731-5p	ENSG00000157514	TSC22D3	protein_coding	chrX	106960090	106960112	106960090	106960112	-	1	0	AGO1	0	1	0	0	0	0	0	2
MIMAT0019924	hsa-miR-4770	ENSG00000157514	TSC22D3	protein_coding	chrX	106957661	106957667	106957660	106957688	-	3	0	AGO1,AGO1-4,AGO2	0	0	1	1	0	1	1	1
MIMAT0002175	hsa-miR-485-5p	ENSG00000157514	TSC22D3	protein_coding	chrX	106957509	106957514	106957509	106957514	-	1	0	AGO2	1	0	0	0	0	0	0	2
MIMAT0004763	hsa-miR-488-3p	ENSG00000157514	TSC22D3	protein_coding	chrX	106956686	106956691	106956686	106956691	-	5	0	AGO1-4,AGO2	1	0	0	0	0	0	0	2
MIMAT0002816	hsa-miR-494-3p	ENSG00000157514	TSC22D3	protein_coding	chrX	106957389	106957394	106957389	106957394	-	4	0	AGO1-4,AGO2	1	0	0	0	0	0	0	0
MIMAT0002817	hsa-miR-495-3p	ENSG00000157514	TSC22D3	protein_coding	chrX	106957684	106957690	106957683	106957711	-	4	0	AGO1,AGO1-4,AGO2	1	0	0	1	1	1	1	3
MIMAT0002820	hsa-miR-497-5p	ENSG00000157514	TSC22D3	protein_coding	chrX	106956860	106956866	106956859	106956883	-	12	0	AGO1-4,AGO2	1	0	0	0	1	1	1	3
MIMAT0002824	hsa-miR-498	ENSG00000157514	TSC22D3	protein_coding	chrX	106956488	106956494	106956487	106956515	-	13	0	AGO1,AGO1-4,AGO2	1	0	1	1	0	0	0	1
MIMAT0019897	hsa-miR-499b-5p	ENSG00000157514	TSC22D3	protein_coding	chrX	106960285	106960303	106960285	106960303	-	1	0	AGO1	0	1	0	0	0	0	0	1
MIMAT0002874	hsa-miR-503-5p	ENSG00000157514	TSC22D3	protein_coding	chrX	106956860	106956865	106956860	106956865	-	12	0	AGO1-4,AGO2	1	0	0	0	0	0	0	7
MIMAT0020541	hsa-miR-5047	ENSG00000157514	TSC22D3	protein_coding	chrX	106959988	106960016	106959988	106960016	-	5	0	AGO1,AGO1-4,AGO2	0	0	0	1	0	0	0	1
MIMAT0002876	hsa-miR-505-3p	ENSG00000157514	TSC22D3	protein_coding	chrX	106956949	106956954	106956949	106956954	-	5	0	AGO1,AGO1-4,AGO2	1	0	0	0	0	0	0	8
MIMAT0002878	hsa-miR-506-3p	ENSG00000157514	TSC22D3	protein_coding	chrX	106956866	106956871	106956866	106956871	-	11	0	AGO1-4,AGO2	1	0	0	0	0	0	0	3
MIMAT0002882	hsa-miR-510-5p	ENSG00000157514	TSC22D3	protein_coding	chrX	106957545	106957550	106957545	106957550	-	1	0	AGO2	1	0	0	0	0	0	0	2
MIMAT0005788	hsa-miR-513b-5p	ENSG00000157514	TSC22D3	protein_coding	chrX	106956572	106956577	106956572	106956577	-	13	0	AGO1,AGO1-4,AGO2	1	0	0	0	0	0	0	3
MIMAT0005789	hsa-miR-513c-5p	ENSG00000157514	TSC22D3	protein_coding	chrX	106956763	106956768	106956763	106956768	-	12	0	AGO1-4,AGO2	1	0	0	0	0	0	0	2
MIMAT0004770	hsa-miR-516a-5p	ENSG00000157514	TSC22D3	protein_coding	chrX	106956915	106956921	106956915	106956921	-	2	0	AGO1-4	1	0	1	0	0	0	0	4
MIMAT0002859	hsa-miR-516b-5p	ENSG00000157514	TSC22D3	protein_coding	chrX	106957409	106957415	106957408	106957436	-	4	0	AGO1-4,AGO2	1	0	0	1	0	0	0	3
MIMAT0002853	hsa-miR-519d-3p	ENSG00000157514	TSC22D3	protein_coding	chrX	106956559	106956564	106956558	106956586	-	17	0	AGO1,AGO1-4,AGO2	1	0	0	1	0	0	0	4
MIMAT0002833	hsa-miR-520a-5p	ENSG00000157514	TSC22D3	protein_coding	chrX	106957553	106957559	106957553	106957559	-	1	0	AGO2	1	0	0	0	0	0	0	4
MIMAT0002855	hsa-miR-520d-5p	ENSG00000157514	TSC22D3	protein_coding	chrX	106956706	106956711	106956706	106956711	-	2	0	AGO1-4	1	0	0	0	0	0	0	2
MIMAT0002858	hsa-miR-520g-3p	ENSG00000157514	TSC22D3	protein_coding	chrX	106956472	106956477	106956472	106956477	-	7	0	AGO1,AGO1-4,AGO2	1	0	0	0	0	0	0	4
MIMAT0002867	hsa-miR-520h	ENSG00000157514	TSC22D3	protein_coding	chrX	106956472	106956477	106956472	106956477	-	7	0	AGO1,AGO1-4,AGO2	1	0	0	0	0	0	0	2
MIMAT0002849	hsa-miR-524-5p	ENSG00000157514	TSC22D3	protein_coding	chrX	106956706	106956711	106956706	106956711	-	2	0	AGO1-4	1	0	0	0	0	0	0	3
MIMAT0002838	hsa-miR-525-5p	ENSG00000157514	TSC22D3	protein_coding	chrX	106957553	106957559	106957553	106957559	-	1	0	AGO2	1	0	0	0	0	0	0	4
MIMAT0002836	hsa-miR-526b-3p	ENSG00000157514	TSC22D3	protein_coding	chrX	106956558	106956579	106956551	106956586	-	18	0	AGO1,AGO1-4,AGO2	0	0	0	2	0	0	0	3
MIMAT0004780	hsa-miR-532-3p	ENSG00000157514	TSC22D3	protein_coding	chrX	106957258	106957263	106957258	106957263	-	3	0	AGO1,AGO2	1	0	1	0	0	0	0	10
MIMAT0004920	hsa-miR-541-3p	ENSG00000157514	TSC22D3	protein_coding	chrX	106956799	106956804	106956799	106956804	-	21	0	AGO1-4,AGO2	1	0	0	0	0	0	0	1
MIMAT0003165	hsa-miR-545-3p	ENSG00000157514	TSC22D3	protein_coding	chrX	106956862	106956867	106956862	106956867	-	12	0	AGO1-4,AGO2	1	0	0	0	0	0	0	1
MIMAT0005919	hsa-miR-548o-3p	ENSG00000157514	TSC22D3	protein_coding	chrX	106956814	106956819	106956814	106956819	-	17	0	AGO1-4,AGO2	1	0	1	0	0	0	0	3
MIMAT0022479	hsa-miR-5688	ENSG00000157514	TSC22D3	protein_coding	chrX	106957684	106957690	106957683	106957711	-	4	0	AGO1,AGO1-4,AGO2	0	0	0	1	0	1	1	1
MIMAT0003245	hsa-miR-580-3p	ENSG00000157514	TSC22D3	protein_coding	chrX	106957386	106957391	106957386	106957391	-	4	0	AGO1-4,AGO2	1	0	0	0	0	0	0	1
MIMAT0004797	hsa-miR-582-3p	ENSG00000157514	TSC22D3	protein_coding	chrX	106956943	106956948	106956943	106956948	-	4	0	AGO1,AGO1-4,AGO2	1	0	1	0	0	0	0	10
MIMAT0003255	hsa-miR-588	ENSG00000157514	TSC22D3	protein_coding	chrX	106957601	106957606	106957601	106957606	-	1	0	AGO1-4	1	0	0	0	0	0	0	3
MIMAT0023713	hsa-miR-6088	ENSG00000157514	TSC22D3	protein_coding	chrX	106957661	106957667	106957660	106957667	-	3	0	AGO1,AGO1-4,AGO2	0	0	1	0	0	1	1	0
MIMAT0003289	hsa-miR-620	ENSG00000157514	TSC22D3	protein_coding	chrX	106957380	106957386	106957380	106957386	-	4	0	AGO1-4,AGO2	1	0	1	0	0	0	0	0
MIMAT0004810	hsa-miR-629-5p	ENSG00000157514	TSC22D3	protein_coding	chrX	106956802	106956807	106956802	106956807	-	22	0	AGO1-4,AGO2	1	0	0	0	0	0	0	11
MIMAT0003311	hsa-miR-641	ENSG00000157514	TSC22D3	protein_coding	chrX	106956937	106956942	106956937	106956942	-	3	0	AGO1-4,AGO2	1	0	0	0	0	0	0	4
MIMAT0003312	hsa-miR-642a-5p	ENSG00000157514	TSC22D3	protein_coding	chrX	106956648	106956653	106956648	106956653	-	5	0	AGO1,AGO1-4,AGO2	1	0	0	0	0	0	0	1
MIMAT0025464	hsa-miR-6504-5p	ENSG00000157514	TSC22D3	protein_coding	chrX	106957516	106957522	106957516	106957522	-	1	0	AGO2	0	0	0	0	0	1	0	0
MIMAT0003321	hsa-miR-651-5p	ENSG00000157514	TSC22D3	protein_coding	chrX	106957612	106957619	106957612	106957619	-	1	0	AGO1-4	1	0	0	0	0	0	0	9
MIMAT0003328	hsa-miR-653-5p	ENSG00000157514	TSC22D3	protein_coding	chrX	106957365	106957371	106957364	106957382	-	5	0	AGO1-4,AGO2	1	0	0	0	1	0	0	2
MIMAT0003330	hsa-miR-654-5p	ENSG00000157514	TSC22D3	protein_coding	chrX	106956799	106956804	106956799	106956804	-	21	0	AGO1-4,AGO2	1	0	0	0	0	0	0	1
MIMAT0003332	hsa-miR-656-3p	ENSG00000157514	TSC22D3	protein_coding	chrX	106957223	106957228	106957223	106957228	-	8	0	AGO1,AGO1-4,AGO2	1	0	0	0	0	0	0	0
MIMAT0027578	hsa-miR-6838-5p	ENSG00000157514	TSC22D3	protein_coding	chrX	106956860	106956866	106956860	106956866	-	12	0	AGO1-4,AGO2	0	0	0	0	0	0	1	1
MIMAT0004945	hsa-miR-744-5p	ENSG00000157514	TSC22D3	protein_coding	chrX	106960077	106960098	106960077	106960098	-	2	0	AGO1,AGO1-4	0	1	0	0	0	0	0	14
MIMAT0004957	hsa-miR-760	ENSG00000157514	TSC22D3	protein_coding	chrX	106957720	106957725	106957719	106957747	-	3	0	AGO1,AGO1-4,AGO2	1	0	1	1	0	1	1	10
MIMAT0003886	hsa-miR-769-5p	ENSG00000157514	TSC22D3	protein_coding	chrX	106957557	106957563	106957557	106957563	-	1	0	AGO2	1	0	0	0	0	0	0	14
MIMAT0004949	hsa-miR-877-5p	ENSG00000157514	TSC22D3	protein_coding	chrX	106957507	106957512	106957507	106957512	-	1	0	AGO2	1	0	0	0	0	0	0	10
MIMAT0000093	hsa-miR-93-5p	ENSG00000157514	TSC22D3	protein_coding	chrX	106956559	106956564	106956559	106956564	-	12	0	AGO1,AGO1-4,AGO2	1	0	0	0	0	0	0	15
MIMAT0004985	hsa-miR-942-5p	ENSG00000157514	TSC22D3	protein_coding	chrX	106957895	106957923	106957895	106957923	-	1	0	AGO1-4	0	0	0	1	0	0	0	12
MIMAT0000096	hsa-miR-98-5p	ENSG00000157514	TSC22D3	protein_coding	chrX	106956990	106956995	106956990	106956995	-	11	0	AGO1,AGO1-4,AGO2	1	0	0	0	0	0	0	5
