# Supplementary material for: Comprehensive bioinformatic analysis of the expression and prognostic significance of TSC22D domain family genes in acute myeloid leukemia
Source: Research Square preprint supplement (doi:10.21203/rs.3.rs-1209284/v1), 2022-01-14
Supplement: Supplementary file 7 [file d0dc4001ecd6328c7c51e462.xlsx]

## Sheet: miRDB
Target Rank	Target Score	miRNA Name
1	92	hsa-miR-3065-3p
2	90	hsa-miR-3692-3p
3	87	hsa-miR-6501-3p
4	84	hsa-miR-221-3p
5	84	hsa-miR-222-3p
6	83	hsa-miR-12114
7	78	hsa-miR-143-3p
8	78	hsa-miR-4770
9	78	hsa-miR-4764-5p
10	74	hsa-miR-4511
11	73	hsa-miR-6088
12	72	hsa-miR-6866-5p
13	72	hsa-miR-4796-3p
14	71	hsa-miR-6846-3p
15	70	hsa-miR-1301-3p
16	70	hsa-miR-5047
17	68	hsa-miR-4708-3p
18	67	hsa-miR-561-3p
19	66	hsa-miR-498-5p
20	65	hsa-miR-4279
21	64	hsa-miR-1237-3p
22	63	hsa-miR-4731-5p
23	63	hsa-miR-3150b-3p
24	61	hsa-miR-219b-5p
25	60	hsa-miR-3978
26	57	hsa-miR-4639-3p
27	57	hsa-miR-4284
28	56	hsa-miR-3133
29	56	hsa-miR-383-3p
30	55	hsa-miR-12117
31	55	hsa-miR-6815-3p
32	54	hsa-miR-6847-5p
33	54	hsa-miR-6815-5p
34	54	hsa-miR-6769b-5p
35	54	hsa-miR-125a-3p
36	54	hsa-miR-6865-5p
37	53	hsa-miR-939-5p
38	53	hsa-miR-1343-5p
39	53	hsa-miR-6737-3p
40	53	hsa-miR-7157-3p
41	53	hsa-miR-8063
42	53	hsa-miR-5008-3p
43	51	hsa-miR-4778-3p
