# Supplementary material for: Comprehensive bioinformatic analysis of the expression and prognostic significance of TSC22D domain family genes in acute myeloid leukemia
Source: Research Square preprint supplement (doi:10.21203/rs.3.rs-1209284/v1), 2022-01-14
Supplement: Supplementary file 8 [file d7b6be087f2387ac8b52da6a.xlsx]

## Sheet: TSC22D1expressioninHSCswithAMLS
TSC22D1 (log2)	215111_s_at
AML t(15;17)	7.13114
AML t(15;17)	7.78229
AML t(15;17)	7.03644
AML t(15;17)	8.37412
AML t(15;17)	9.41228
AML t(15;17)	8.98277
AML t(15;17)	8.57025
AML t(15;17)	6.76017
AML t(15;17)	8.35371
AML t(15;17)	8.50361
AML t(15;17)	9.00632
AML t(15;17)	8.7894
AML t(15;17)	8.69691
AML t(15;17)	7.30099
AML t(15;17)	9.14197
AML t(15;17)	8.04489
AML t(15;17)	8.1416
AML t(15;17)	5.83471
AML t(15;17)	8.25316
AML t(15;17)	8.51944
AML t(15;17)	9.41687
AML t(15;17)	8.39563
AML t(15;17)	8.62218
AML t(15;17)	7.39796
AML t(15;17)	7.21373
AML t(15;17)	7.48025
AML t(15;17)	9.44008
AML t(15;17)	8.38085
AML t(15;17)	7.88253
AML t(15;17)	9.94165
AML t(15;17)	7.98544
AML t(15;17)	7.27257
AML t(15;17)	10.214
AML t(15;17)	5.09246
AML t(15;17)	8.49279
AML t(15;17)	6.36772
AML t(15;17)	5.14989
AML t(15;17)	6.57106
AML t(15;17)	8.69139
AML t(15;17)	6.54762
AML t(15;17)	7.4936
AML t(15;17)	10.0747
AML t(15;17)	5.6149
AML t(15;17)	8.58791
AML t(15;17)	6.76307
AML t(15;17)	8.79734
AML t(15;17)	6.98045
AML t(15;17)	7.91963
AML t(15;17)	8.65038
AML t(15;17)	5.53272
AML t(15;17)	8.41384
AML t(15;17)	7.09438
AML t(15;17)	7.76788
AML t(15;17)	8.24054
AML inv(16)/t(16;16)	8.21277
AML inv(16)/t(16;16)	7.35797
AML inv(16)/t(16;16)	9.06281
AML inv(16)/t(16;16)	11.0292
AML inv(16)/t(16;16)	7.33496
AML inv(16)/t(16;16)	9.65235
AML inv(16)/t(16;16)	10.6676
AML inv(16)/t(16;16)	10.0732
AML inv(16)/t(16;16)	11.1452
AML inv(16)/t(16;16)	9.69287
AML inv(16)/t(16;16)	9.86256
AML inv(16)/t(16;16)	10.7246
AML inv(16)/t(16;16)	10.2206
AML inv(16)/t(16;16)	10.4276
AML inv(16)/t(16;16)	10.7856
AML inv(16)/t(16;16)	8.25485
AML inv(16)/t(16;16)	9.97514
AML inv(16)/t(16;16)	10.6977
AML inv(16)/t(16;16)	9.87548
AML inv(16)/t(16;16)	9.99646
AML inv(16)/t(16;16)	9.21649
AML inv(16)/t(16;16)	7.8721
AML inv(16)/t(16;16)	7.32988
AML inv(16)/t(16;16)	9.48377
AML inv(16)/t(16;16)	9.88464
AML inv(16)/t(16;16)	9.67662
AML inv(16)/t(16;16)	8.54446
AML inv(16)/t(16;16)	6.82904
AML inv(16)/t(16;16)	8.60315
AML inv(16)/t(16;16)	9.38701
AML inv(16)/t(16;16)	7.66837
AML inv(16)/t(16;16)	9.36979
AML inv(16)/t(16;16)	9.41765
AML inv(16)/t(16;16)	9.33283
AML inv(16)/t(16;16)	10.5221
AML inv(16)/t(16;16)	7.53416
AML inv(16)/t(16;16)	10.0176
AML inv(16)/t(16;16)	9.6635
AML inv(16)/t(16;16)	10.5584
AML inv(16)/t(16;16)	10.5518
AML inv(16)/t(16;16)	10.7061
AML inv(16)/t(16;16)	10.9956
AML inv(16)/t(16;16)	11.1051
AML inv(16)/t(16;16)	10.0341
AML inv(16)/t(16;16)	11.3591
AML inv(16)/t(16;16)	8.54719
AML inv(16)/t(16;16)	9.90712
AML t(8;21)	7.31733
AML t(8;21)	7.11184
AML t(8;21)	9.68618
AML t(8;21)	8.28522
AML t(8;21)	5.8801
AML t(8;21)	7.19641
AML t(8;21)	7.55642
AML t(8;21)	7.50443
AML t(8;21)	8.22149
AML t(8;21)	8.6411
AML t(8;21)	6.89141
AML t(8;21)	5.63913
AML t(8;21)	8.75256
AML t(8;21)	7.59383
AML t(8;21)	7.84043
AML t(8;21)	9.36832
AML t(8;21)	8.02178
AML t(8;21)	8.58777
AML t(8;21)	7.8593
AML t(8;21)	9.05641
AML t(8;21)	8.26926
AML t(8;21)	9.917
AML t(8;21)	8.91074
AML t(8;21)	7.72356
AML t(8;21)	6.60098
AML t(8;21)	8.05094
AML t(8;21)	6.98176
AML t(8;21)	8.40175
AML t(8;21)	7.45449
AML t(8;21)	8.24099
AML t(8;21)	7.25455
AML t(8;21)	8.20296
AML t(8;21)	7.61189
AML t(8;21)	8.83058
AML t(8;21)	8.40685
AML t(8;21)	7.08223
AML t(8;21)	7.01803
AML t(8;21)	8.62119
AML t(8;21)	8.74331
AML t(8;21)	6.38473
AML t(8;21)	8.00118
AML t(8;21)	6.49549
AML t(8;21)	7.25253
AML t(8;21)	7.07418
AML t(8;21)	9.51366
AML t(8;21)	7.67161
AML t(8;21)	7.95074
AML t(8;21)	6.93096
AML t(8;21)	10.1123
AML t(8;21)	7.19704
AML t(8;21)	9.49128
AML t(8;21)	9.24097
AML t(8;21)	8.20881
AML t(8;21)	7.23505
AML t(8;21)	10.5729
AML t(8;21)	7.9328
AML t(8;21)	7.63143
AML t(8;21)	8.21564
AML t(8;21)	7.84822
AML t(8;21)	8.39202
AML t(11q23)/MLL	7.20089
AML t(11q23)/MLL	7.34496
AML t(11q23)/MLL	4.80005
AML t(11q23)/MLL	8.67424
AML t(11q23)/MLL	8.11572
AML t(11q23)/MLL	6.83691
AML t(11q23)/MLL	7.57146
AML t(11q23)/MLL	7.49933
AML t(11q23)/MLL	7.09267
AML t(11q23)/MLL	8.61104
AML t(11q23)/MLL	6.37715
AML t(11q23)/MLL	5.89643
AML t(11q23)/MLL	8.34466
AML t(11q23)/MLL	6.55711
AML t(11q23)/MLL	7.10381
AML t(11q23)/MLL	7.27063
AML t(11q23)/MLL	6.68376
AML t(11q23)/MLL	8.24438
AML t(11q23)/MLL	4.22307
AML t(11q23)/MLL	6.23348
AML t(11q23)/MLL	8.09019
AML t(11q23)/MLL	7.46781
AML t(11q23)/MLL	9.25806
AML t(11q23)/MLL	8.98216
AML t(11q23)/MLL	8.04295
AML t(11q23)/MLL	9.86001
AML t(11q23)/MLL	7.80026
AML t(11q23)/MLL	9.89683
AML t(11q23)/MLL	6.46872
AML t(11q23)/MLL	6.57447
AML t(11q23)/MLL	8.66602
AML t(11q23)/MLL	5.88165
AML t(11q23)/MLL	5.80321
AML t(11q23)/MLL	11.0551
AML t(11q23)/MLL	8.69507
AML t(11q23)/MLL	8.86518
AML t(11q23)/MLL	6.38017
AML t(11q23)/MLL	10.3461
AML t(11q23)/MLL	7.22957
AML t(11q23)/MLL	7.85347
AML t(11q23)/MLL	8.56611
AML t(11q23)/MLL	10.0993
AML t(11q23)/MLL	4.74163
AML complex	9.95011
AML complex	9.303
AML complex	9.35559
AML complex	8.68706
AML complex	8.38365
AML complex	9.82203
AML complex	8.48782
AML complex	11.5965
AML complex	10.6871
AML complex	10.2657
AML complex	10.4219
AML complex	8.40244
AML complex	9.92842
AML complex	10.4537
AML complex	9.23243
AML complex	8.1085
AML complex	8.25145
AML complex	9.98695
AML complex	9.63715
AML complex	8.79579
AML complex	10.66
AML complex	8.33064
AML complex	10.842
AML complex	8.51047
AML complex	10.6368
AML complex	7.59921
AML complex	9.03747
AML complex	9.39739
AML complex	9.51349
AML complex	9.95023
AML complex	9.75962
AML complex	9.46941
AML complex	10.3084
AML complex	8.56651
AML complex	10.3936
AML complex	7.42827
AML complex	9.95095
AML complex	9.44241
AML complex	10.9262
AML complex	8.42496
AML complex	11.3823
AML complex	8.86579
AML complex	7.48465
AML complex	9.56568
AML complex	8.52505
AML complex	9.03747
AML complex	10.4257
AML complex	7.88867
HSC	10.1179
HSC	11.0329
HSC	10.0712
HSC	9.84496
HSC	10.2519
HSC	10.3052

## Sheet: TSC22D2expressioninHSCswithAMLS
TSC22D2 (log2)	210953_at
AML t(15;17)	4.25828
AML t(15;17)	4.01812
AML t(15;17)	4.68904
AML t(15;17)	4.21645
AML t(15;17)	3.99794
AML t(15;17)	4.1194
AML t(15;17)	3.7372
AML t(15;17)	4.11385
AML t(15;17)	3.62713
AML t(15;17)	3.77952
AML t(15;17)	3.93697
AML t(15;17)	3.9571
AML t(15;17)	4.42755
AML t(15;17)	4.38533
AML t(15;17)	3.75539
AML t(15;17)	4.1142
AML t(15;17)	4.20099
AML t(15;17)	4.14275
AML t(15;17)	3.79932
AML t(15;17)	3.74617
AML t(15;17)	4.40668
AML t(15;17)	4.50271
AML t(15;17)	3.96641
AML t(15;17)	4.56777
AML t(15;17)	4.67629
AML t(15;17)	4.42105
AML t(15;17)	3.8178
AML t(15;17)	3.94014
AML t(15;17)	4.18031
AML t(15;17)	4.46027
AML t(15;17)	4.60095
AML t(15;17)	3.49263
AML t(15;17)	3.89652
AML t(15;17)	4.77179
AML t(15;17)	4.23586
AML t(15;17)	4.00958
AML t(15;17)	4.6766
AML t(15;17)	4.32549
AML t(15;17)	4.2129
AML t(15;17)	4.1726
AML t(15;17)	3.89926
AML t(15;17)	4.05336
AML t(15;17)	4.22319
AML t(15;17)	4.05174
AML t(15;17)	4.17276
AML t(15;17)	3.98581
AML t(15;17)	4.37801
AML t(15;17)	4.26583
AML t(15;17)	4.19611
AML t(15;17)	4.36828
AML t(15;17)	3.75387
AML t(15;17)	4.44677
AML t(15;17)	3.9813
AML t(15;17)	3.84656
AML inv(16)/t(16;16)	4.3668
AML inv(16)/t(16;16)	4.3547
AML inv(16)/t(16;16)	3.67058
AML inv(16)/t(16;16)	3.82787
AML inv(16)/t(16;16)	3.90893
AML inv(16)/t(16;16)	4.14559
AML inv(16)/t(16;16)	3.93048
AML inv(16)/t(16;16)	4.07907
AML inv(16)/t(16;16)	3.95866
AML inv(16)/t(16;16)	4.16134
AML inv(16)/t(16;16)	3.97716
AML inv(16)/t(16;16)	4.32439
AML inv(16)/t(16;16)	4.33084
AML inv(16)/t(16;16)	4.4851
AML inv(16)/t(16;16)	4.1281
AML inv(16)/t(16;16)	3.93879
AML inv(16)/t(16;16)	4.90389
AML inv(16)/t(16;16)	3.93847
AML inv(16)/t(16;16)	4.18749
AML inv(16)/t(16;16)	3.86381
AML inv(16)/t(16;16)	4.18507
AML inv(16)/t(16;16)	4.83315
AML inv(16)/t(16;16)	4.22267
AML inv(16)/t(16;16)	4.14294
AML inv(16)/t(16;16)	4.14008
AML inv(16)/t(16;16)	4.0529
AML inv(16)/t(16;16)	4.69138
AML inv(16)/t(16;16)	3.94886
AML inv(16)/t(16;16)	4.61789
AML inv(16)/t(16;16)	4.38277
AML inv(16)/t(16;16)	4.23369
AML inv(16)/t(16;16)	4.28073
AML inv(16)/t(16;16)	4.49906
AML inv(16)/t(16;16)	4.11182
AML inv(16)/t(16;16)	4.76595
AML inv(16)/t(16;16)	4.4726
AML inv(16)/t(16;16)	4.63877
AML inv(16)/t(16;16)	4.06597
AML inv(16)/t(16;16)	3.7541
AML inv(16)/t(16;16)	3.46746
AML inv(16)/t(16;16)	4.20537
AML inv(16)/t(16;16)	4.23715
AML inv(16)/t(16;16)	3.97069
AML inv(16)/t(16;16)	4.06705
AML inv(16)/t(16;16)	4.13443
AML inv(16)/t(16;16)	4.01682
AML inv(16)/t(16;16)	3.95998
AML t(8;21)	4.38649
AML t(8;21)	4.21228
AML t(8;21)	4.01388
AML t(8;21)	4.0563
AML t(8;21)	4.356
AML t(8;21)	4.34329
AML t(8;21)	3.99064
AML t(8;21)	4.32253
AML t(8;21)	4.29669
AML t(8;21)	4.24915
AML t(8;21)	4.17177
AML t(8;21)	4.47732
AML t(8;21)	4.27783
AML t(8;21)	4.17393
AML t(8;21)	4.39164
AML t(8;21)	4.12677
AML t(8;21)	3.97621
AML t(8;21)	4.25578
AML t(8;21)	4.05591
AML t(8;21)	3.89906
AML t(8;21)	4.16848
AML t(8;21)	4.14668
AML t(8;21)	4.17748
AML t(8;21)	4.03927
AML t(8;21)	4.47705
AML t(8;21)	4.34443
AML t(8;21)	4.82099
AML t(8;21)	4.06862
AML t(8;21)	4.17622
AML t(8;21)	4.25053
AML t(8;21)	3.97581
AML t(8;21)	3.83453
AML t(8;21)	3.6984
AML t(8;21)	4.11582
AML t(8;21)	4.38767
AML t(8;21)	3.91561
AML t(8;21)	4.00227
AML t(8;21)	4.73138
AML t(8;21)	4.18936
AML t(8;21)	4.63085
AML t(8;21)	4.2
AML t(8;21)	4.29091
AML t(8;21)	4.13061
AML t(8;21)	4.12544
AML t(8;21)	4.03241
AML t(8;21)	3.96615
AML t(8;21)	3.84384
AML t(8;21)	4.06376
AML t(8;21)	4.13623
AML t(8;21)	3.9243
AML t(8;21)	4.1731
AML t(8;21)	4.31148
AML t(8;21)	4.01122
AML t(8;21)	3.85003
AML t(8;21)	3.74022
AML t(8;21)	4.19969
AML t(8;21)	3.73071
AML t(8;21)	4.55957
AML t(8;21)	4.18483
AML t(8;21)	3.70695
AML t(11q23)/MLL	4.28609
AML t(11q23)/MLL	3.85054
AML t(11q23)/MLL	4.06001
AML t(11q23)/MLL	4.65338
AML t(11q23)/MLL	3.9752
AML t(11q23)/MLL	4.4075
AML t(11q23)/MLL	4.24416
AML t(11q23)/MLL	4.06973
AML t(11q23)/MLL	3.82851
AML t(11q23)/MLL	4.36956
AML t(11q23)/MLL	4.43994
AML t(11q23)/MLL	4.63672
AML t(11q23)/MLL	4.41054
AML t(11q23)/MLL	4.30038
AML t(11q23)/MLL	4.22809
AML t(11q23)/MLL	4.26556
AML t(11q23)/MLL	4.11973
AML t(11q23)/MLL	3.93575
AML t(11q23)/MLL	4.2837
AML t(11q23)/MLL	4.08393
AML t(11q23)/MLL	4.22088
AML t(11q23)/MLL	5.15787
AML t(11q23)/MLL	4.50686
AML t(11q23)/MLL	3.98831
AML t(11q23)/MLL	4.13291
AML t(11q23)/MLL	3.5581
AML t(11q23)/MLL	6.79867
AML t(11q23)/MLL	4.20432
AML t(11q23)/MLL	4.20802
AML t(11q23)/MLL	3.91503
AML t(11q23)/MLL	3.89118
AML t(11q23)/MLL	4.13766
AML t(11q23)/MLL	3.9157
AML t(11q23)/MLL	4.8674
AML t(11q23)/MLL	4.16478
AML t(11q23)/MLL	4.21096
AML t(11q23)/MLL	4.12082
AML t(11q23)/MLL	4.11425
AML t(11q23)/MLL	4.40291
AML t(11q23)/MLL	4.48378
AML t(11q23)/MLL	4.48135
AML t(11q23)/MLL	4.10661
AML t(11q23)/MLL	4.40432
AML complex	4.43103
AML complex	3.87799
AML complex	4.03836
AML complex	4.32616
AML complex	4.12319
AML complex	4.04262
AML complex	4.35427
AML complex	4.37025
AML complex	3.99739
AML complex	4.04576
AML complex	4.20783
AML complex	3.97231
AML complex	4.29074
AML complex	4.28184
AML complex	4.23055
AML complex	4.31088
AML complex	4.01236
AML complex	4.15241
AML complex	3.95452
AML complex	3.96746
AML complex	4.06119
AML complex	4.43982
AML complex	3.95683
AML complex	4.12335
AML complex	4.1383
AML complex	4.35951
AML complex	4.11713
AML complex	4.21029
AML complex	3.99022
AML complex	4.15748
AML complex	4.11672
AML complex	3.96929
AML complex	3.97217
AML complex	4.08896
AML complex	4.37306
AML complex	3.94266
AML complex	4.02454
AML complex	4.42827
AML complex	4.09099
AML complex	4.15083
AML complex	4.12093
AML complex	4.38992
AML complex	4.02581
AML complex	3.88774
AML complex	4.06325
AML complex	4.11713
AML complex	4.37494
AML complex	5.04344
HSC	4.14888
HSC	3.9274
HSC	3.62966
HSC	4.05767
HSC	4.48919
HSC	3.69754

## Sheet: TSC22D3expressioninHSCswithAMLS
TSC22D3 (log2)	208763_s_at
AML t(15;17)	9.97054
AML t(15;17)	8.40918
AML t(15;17)	9.98687
AML t(15;17)	9.87843
AML t(15;17)	10.0974
AML t(15;17)	10.0012
AML t(15;17)	9.57648
AML t(15;17)	9.86222
AML t(15;17)	10.3536
AML t(15;17)	9.64131
AML t(15;17)	9.14737
AML t(15;17)	9.1481
AML t(15;17)	9.29328
AML t(15;17)	10.3553
AML t(15;17)	9.87224
AML t(15;17)	9.68401
AML t(15;17)	10.5269
AML t(15;17)	9.77817
AML t(15;17)	8.74911
AML t(15;17)	10.1848
AML t(15;17)	9.32769
AML t(15;17)	9.54163
AML t(15;17)	10.508
AML t(15;17)	10.3001
AML t(15;17)	9.93539
AML t(15;17)	8.63939
AML t(15;17)	10.0527
AML t(15;17)	8.10541
AML t(15;17)	9.23478
AML t(15;17)	8.70817
AML t(15;17)	9.79177
AML t(15;17)	9.99676
AML t(15;17)	10.8694
AML t(15;17)	10.6804
AML t(15;17)	10.2198
AML t(15;17)	8.27713
AML t(15;17)	10.2929
AML t(15;17)	9.96651
AML t(15;17)	10.2395
AML t(15;17)	9.92064
AML t(15;17)	10.6192
AML t(15;17)	10.9916
AML t(15;17)	10.1058
AML t(15;17)	10.9284
AML t(15;17)	11.1933
AML t(15;17)	9.25362
AML t(15;17)	8.85129
AML t(15;17)	9.97505
AML t(15;17)	8.89317
AML t(15;17)	9.56729
AML t(15;17)	10.5967
AML t(15;17)	10.2538
AML t(15;17)	8.37137
AML t(15;17)	9.11461
AML inv(16)/t(16;16)	9.7605
AML inv(16)/t(16;16)	10.1878
AML inv(16)/t(16;16)	10.0583
AML inv(16)/t(16;16)	11.5835
AML inv(16)/t(16;16)	10.0412
AML inv(16)/t(16;16)	11.2155
AML inv(16)/t(16;16)	10.9028
AML inv(16)/t(16;16)	8.92898
AML inv(16)/t(16;16)	10.7372
AML inv(16)/t(16;16)	9.40752
AML inv(16)/t(16;16)	10.7484
AML inv(16)/t(16;16)	11.2142
AML inv(16)/t(16;16)	11.1203
AML inv(16)/t(16;16)	11.0061
AML inv(16)/t(16;16)	10.859
AML inv(16)/t(16;16)	8.00845
AML inv(16)/t(16;16)	10.9469
AML inv(16)/t(16;16)	11.2412
AML inv(16)/t(16;16)	10.4025
AML inv(16)/t(16;16)	10.9573
AML inv(16)/t(16;16)	9.94191
AML inv(16)/t(16;16)	9.48004
AML inv(16)/t(16;16)	8.8383
AML inv(16)/t(16;16)	10.886
AML inv(16)/t(16;16)	10.0743
AML inv(16)/t(16;16)	10.1059
AML inv(16)/t(16;16)	9.63945
AML inv(16)/t(16;16)	10.1369
AML inv(16)/t(16;16)	9.93417
AML inv(16)/t(16;16)	10.3142
AML inv(16)/t(16;16)	9.32613
AML inv(16)/t(16;16)	9.87414
AML inv(16)/t(16;16)	10.9763
AML inv(16)/t(16;16)	10.1102
AML inv(16)/t(16;16)	10.7784
AML inv(16)/t(16;16)	9.66527
AML inv(16)/t(16;16)	10.8183
AML inv(16)/t(16;16)	10.5126
AML inv(16)/t(16;16)	11.1562
AML inv(16)/t(16;16)	11.2483
AML inv(16)/t(16;16)	10.8842
AML inv(16)/t(16;16)	10.2831
AML inv(16)/t(16;16)	11.111
AML inv(16)/t(16;16)	9.96789
AML inv(16)/t(16;16)	10.8934
AML inv(16)/t(16;16)	10.3229
AML inv(16)/t(16;16)	10.2679
AML t(8;21)	9.8507
AML t(8;21)	8.99534
AML t(8;21)	10.2665
AML t(8;21)	9.64802
AML t(8;21)	10.4078
AML t(8;21)	9.62362
AML t(8;21)	9.80783
AML t(8;21)	11.2456
AML t(8;21)	10.3337
AML t(8;21)	10.4828
AML t(8;21)	9.90848
AML t(8;21)	9.22306
AML t(8;21)	10.3555
AML t(8;21)	9.87813
AML t(8;21)	10.3845
AML t(8;21)	10.5183
AML t(8;21)	9.57291
AML t(8;21)	11.5197
AML t(8;21)	10.1813
AML t(8;21)	9.89727
AML t(8;21)	11.0466
AML t(8;21)	10.8582
AML t(8;21)	11.1421
AML t(8;21)	8.42933
AML t(8;21)	10.4818
AML t(8;21)	9.97334
AML t(8;21)	10.3524
AML t(8;21)	11.3583
AML t(8;21)	10.3632
AML t(8;21)	9.81919
AML t(8;21)	10.5141
AML t(8;21)	10.0298
AML t(8;21)	9.40803
AML t(8;21)	8.45504
AML t(8;21)	11.1245
AML t(8;21)	11.0782
AML t(8;21)	8.23745
AML t(8;21)	9.8562
AML t(8;21)	10.3927
AML t(8;21)	10.8334
AML t(8;21)	8.70101
AML t(8;21)	10.5022
AML t(8;21)	10.8187
AML t(8;21)	9.96566
AML t(8;21)	10.279
AML t(8;21)	9.32654
AML t(8;21)	9.74638
AML t(8;21)	8.9881
AML t(8;21)	10.9139
AML t(8;21)	9.83102
AML t(8;21)	10.889
AML t(8;21)	11.4539
AML t(8;21)	9.45151
AML t(8;21)	9.54802
AML t(8;21)	11.343
AML t(8;21)	9.9246
AML t(8;21)	9.85602
AML t(8;21)	11.5344
AML t(8;21)	10.4897
AML t(8;21)	10.995
AML t(11q23)/MLL	10.5438
AML t(11q23)/MLL	9.34051
AML t(11q23)/MLL	10.8943
AML t(11q23)/MLL	10.1371
AML t(11q23)/MLL	9.61478
AML t(11q23)/MLL	8.88691
AML t(11q23)/MLL	10.7125
AML t(11q23)/MLL	10.6243
AML t(11q23)/MLL	10.4446
AML t(11q23)/MLL	9.72891
AML t(11q23)/MLL	11.3408
AML t(11q23)/MLL	11.3049
AML t(11q23)/MLL	8.77094
AML t(11q23)/MLL	10.7883
AML t(11q23)/MLL	9.13172
AML t(11q23)/MLL	11.4077
AML t(11q23)/MLL	11.3381
AML t(11q23)/MLL	10.3371
AML t(11q23)/MLL	11.1122
AML t(11q23)/MLL	10.8701
AML t(11q23)/MLL	8.22646
AML t(11q23)/MLL	10.0817
AML t(11q23)/MLL	11.078
AML t(11q23)/MLL	8.54857
AML t(11q23)/MLL	11.1435
AML t(11q23)/MLL	10.3546
AML t(11q23)/MLL	10.2121
AML t(11q23)/MLL	11.0419
AML t(11q23)/MLL	10.0523
AML t(11q23)/MLL	8.38868
AML t(11q23)/MLL	10.5163
AML t(11q23)/MLL	9.01529
AML t(11q23)/MLL	10.5015
AML t(11q23)/MLL	9.85085
AML t(11q23)/MLL	10.5843
AML t(11q23)/MLL	10.9976
AML t(11q23)/MLL	9.29685
AML t(11q23)/MLL	11.186
AML t(11q23)/MLL	10.8063
AML t(11q23)/MLL	10.9229
AML t(11q23)/MLL	11.0604
AML t(11q23)/MLL	9.75945
AML t(11q23)/MLL	10.4862
AML complex	10.8382
AML complex	10.7607
AML complex	10.4222
AML complex	9.83011
AML complex	10.6431
AML complex	10.338
AML complex	9.91407
AML complex	11.1176
AML complex	10.5864
AML complex	10.6432
AML complex	10.6035
AML complex	7.73198
AML complex	10.8557
AML complex	10.1937
AML complex	10.7648
AML complex	8.64748
AML complex	10.0944
AML complex	9.36158
AML complex	9.63047
AML complex	10.0537
AML complex	11.0908
AML complex	9.56863
AML complex	9.14331
AML complex	10.6623
AML complex	9.95278
AML complex	9.38658
AML complex	9.69937
AML complex	10.1912
AML complex	10.508
AML complex	9.92806
AML complex	10.0766
AML complex	10.9628
AML complex	10.924
AML complex	10.1216
AML complex	10.4877
AML complex	9.72508
AML complex	10.3567
AML complex	9.6461
AML complex	10.8439
AML complex	10.446
AML complex	10.7529
AML complex	11.0878
AML complex	10.8459
AML complex	9.69432
AML complex	9.8988
AML complex	9.69937
AML complex	10.8158
AML complex	10.5594
HSC	7.99269
HSC	10.0698
HSC	8.86615
HSC	10.1016
HSC	9.11108
HSC	10.2522

## Sheet: TSC22D4expressioninHSCswithAMLS
TSC22D4 (log2)	208104_s_at
AML t(15;17)	7.16511
AML t(15;17)	7.01496
AML t(15;17)	6.61641
AML t(15;17)	6.37315
AML t(15;17)	6.48419
AML t(15;17)	7.03159
AML t(15;17)	5.99766
AML t(15;17)	6.38781
AML t(15;17)	6.56655
AML t(15;17)	6.61369
AML t(15;17)	5.91497
AML t(15;17)	6.21744
AML t(15;17)	6.85757
AML t(15;17)	6.94074
AML t(15;17)	6.30371
AML t(15;17)	6.28821
AML t(15;17)	6.71754
AML t(15;17)	6.60739
AML t(15;17)	6.69846
AML t(15;17)	6.56557
AML t(15;17)	5.72728
AML t(15;17)	6.26842
AML t(15;17)	6.7985
AML t(15;17)	6.81536
AML t(15;17)	7.13689
AML t(15;17)	6.92949
AML t(15;17)	5.23283
AML t(15;17)	6.17011
AML t(15;17)	5.44772
AML t(15;17)	5.84863
AML t(15;17)	6.37124
AML t(15;17)	7.01377
AML t(15;17)	6.72603
AML t(15;17)	6.33105
AML t(15;17)	6.56211
AML t(15;17)	6.57885
AML t(15;17)	6.28051
AML t(15;17)	6.84158
AML t(15;17)	6.60591
AML t(15;17)	6.69408
AML t(15;17)	6.99346
AML t(15;17)	6.47002
AML t(15;17)	6.92614
AML t(15;17)	6.34071
AML t(15;17)	6.92433
AML t(15;17)	6.17824
AML t(15;17)	6.56004
AML t(15;17)	5.36539
AML t(15;17)	6.03208
AML t(15;17)	6.97994
AML t(15;17)	7.13831
AML t(15;17)	6.90068
AML t(15;17)	5.66258
AML t(15;17)	5.91003
AML inv(16)/t(16;16)	5.80254
AML inv(16)/t(16;16)	6.01179
AML inv(16)/t(16;16)	6.26052
AML inv(16)/t(16;16)	6.09245
AML inv(16)/t(16;16)	6.81703
AML inv(16)/t(16;16)	6.92006
AML inv(16)/t(16;16)	6.41312
AML inv(16)/t(16;16)	6.54859
AML inv(16)/t(16;16)	6.32845
AML inv(16)/t(16;16)	6.51537
AML inv(16)/t(16;16)	6.32199
AML inv(16)/t(16;16)	6.35227
AML inv(16)/t(16;16)	6.0994
AML inv(16)/t(16;16)	6.36174
AML inv(16)/t(16;16)	6.30998
AML inv(16)/t(16;16)	6.4083
AML inv(16)/t(16;16)	6.93012
AML inv(16)/t(16;16)	7.39888
AML inv(16)/t(16;16)	6.78636
AML inv(16)/t(16;16)	6.49009
AML inv(16)/t(16;16)	6.04108
AML inv(16)/t(16;16)	6.90762
AML inv(16)/t(16;16)	6.27286
AML inv(16)/t(16;16)	6.53369
AML inv(16)/t(16;16)	6.83659
AML inv(16)/t(16;16)	6.57124
AML inv(16)/t(16;16)	6.5594
AML inv(16)/t(16;16)	6.50365
AML inv(16)/t(16;16)	6.38218
AML inv(16)/t(16;16)	6.15908
AML inv(16)/t(16;16)	6.3704
AML inv(16)/t(16;16)	6.35898
AML inv(16)/t(16;16)	6.25282
AML inv(16)/t(16;16)	6.31434
AML inv(16)/t(16;16)	6.15298
AML inv(16)/t(16;16)	6.38854
AML inv(16)/t(16;16)	6.5366
AML inv(16)/t(16;16)	6.07857
AML inv(16)/t(16;16)	6.74238
AML inv(16)/t(16;16)	6.38172
AML inv(16)/t(16;16)	6.45058
AML inv(16)/t(16;16)	5.68087
AML inv(16)/t(16;16)	6.35975
AML inv(16)/t(16;16)	7.34653
AML inv(16)/t(16;16)	6.44639
AML inv(16)/t(16;16)	6.4041
AML inv(16)/t(16;16)	6.36004
AML t(8;21)	6.88201
AML t(8;21)	6.37418
AML t(8;21)	6.39986
AML t(8;21)	7.38524
AML t(8;21)	6.76433
AML t(8;21)	6.39848
AML t(8;21)	6.16268
AML t(8;21)	6.83906
AML t(8;21)	6.52355
AML t(8;21)	6.00425
AML t(8;21)	7.4233
AML t(8;21)	6.59408
AML t(8;21)	6.35467
AML t(8;21)	6.84687
AML t(8;21)	6.40015
AML t(8;21)	7.25456
AML t(8;21)	6.13383
AML t(8;21)	7.17623
AML t(8;21)	6.79376
AML t(8;21)	6.6079
AML t(8;21)	6.89575
AML t(8;21)	6.49946
AML t(8;21)	6.62156
AML t(8;21)	6.08957
AML t(8;21)	6.21897
AML t(8;21)	6.47206
AML t(8;21)	7.06144
AML t(8;21)	6.78971
AML t(8;21)	6.18659
AML t(8;21)	5.93909
AML t(8;21)	5.92018
AML t(8;21)	6.25601
AML t(8;21)	6.36284
AML t(8;21)	6.32985
AML t(8;21)	6.89273
AML t(8;21)	6.90535
AML t(8;21)	6.52372
AML t(8;21)	6.49508
AML t(8;21)	5.54181
AML t(8;21)	6.35896
AML t(8;21)	6.08522
AML t(8;21)	6.98046
AML t(8;21)	7.0736
AML t(8;21)	6.19544
AML t(8;21)	6.36044
AML t(8;21)	6.54863
AML t(8;21)	6.35354
AML t(8;21)	6.22239
AML t(8;21)	7.33975
AML t(8;21)	7.05384
AML t(8;21)	6.37488
AML t(8;21)	6.77176
AML t(8;21)	6.79724
AML t(8;21)	5.82318
AML t(8;21)	6.13568
AML t(8;21)	6.90476
AML t(8;21)	5.77513
AML t(8;21)	5.59917
AML t(8;21)	6.75754
AML t(8;21)	6.91676
AML t(11q23)/MLL	6.52216
AML t(11q23)/MLL	6.78034
AML t(11q23)/MLL	6.38016
AML t(11q23)/MLL	6.56934
AML t(11q23)/MLL	7.2218
AML t(11q23)/MLL	6.67562
AML t(11q23)/MLL	6.59627
AML t(11q23)/MLL	6.61249
AML t(11q23)/MLL	6.33478
AML t(11q23)/MLL	6.41769
AML t(11q23)/MLL	6.67985
AML t(11q23)/MLL	7.14478
AML t(11q23)/MLL	6.77636
AML t(11q23)/MLL	6.67163
AML t(11q23)/MLL	7.04205
AML t(11q23)/MLL	6.49045
AML t(11q23)/MLL	6.60139
AML t(11q23)/MLL	4.9829
AML t(11q23)/MLL	6.61401
AML t(11q23)/MLL	6.55425
AML t(11q23)/MLL	5.82473
AML t(11q23)/MLL	6.98637
AML t(11q23)/MLL	7.03178
AML t(11q23)/MLL	7.27351
AML t(11q23)/MLL	6.48604
AML t(11q23)/MLL	5.74985
AML t(11q23)/MLL	6.34507
AML t(11q23)/MLL	5.64584
AML t(11q23)/MLL	6.58926
AML t(11q23)/MLL	6.73563
AML t(11q23)/MLL	6.83536
AML t(11q23)/MLL	6.09379
AML t(11q23)/MLL	6.86677
AML t(11q23)/MLL	5.54821
AML t(11q23)/MLL	7.19811
AML t(11q23)/MLL	6.20614
AML t(11q23)/MLL	6.63606
AML t(11q23)/MLL	6.53025
AML t(11q23)/MLL	6.68431
AML t(11q23)/MLL	6.51406
AML t(11q23)/MLL	6.1023
AML t(11q23)/MLL	6.66315
AML t(11q23)/MLL	5.83966
AML complex	6.3949
AML complex	6.53799
AML complex	6.00425
AML complex	6.26561
AML complex	7.13627
AML complex	6.24478
AML complex	6.2082
AML complex	6.21965
AML complex	7.11105
AML complex	6.33809
AML complex	6.19283
AML complex	5.90933
AML complex	6.3908
AML complex	7.12676
AML complex	7.41716
AML complex	7.16743
AML complex	5.95217
AML complex	6.55175
AML complex	5.88035
AML complex	6.54251
AML complex	6.31131
AML complex	6.45152
AML complex	6.22331
AML complex	6.14906
AML complex	6.46382
AML complex	6.46056
AML complex	6.15767
AML complex	6.02732
AML complex	5.35054
AML complex	7.01988
AML complex	6.37069
AML complex	6.72536
AML complex	7.53341
AML complex	6.33998
AML complex	6.16231
AML complex	6.08799
AML complex	5.85529
AML complex	6.86684
AML complex	5.7262
AML complex	6.9249
AML complex	6.20683
AML complex	6.94768
AML complex	6.33936
AML complex	6.68421
AML complex	6.12412
AML complex	6.15767
AML complex	6.88525
AML complex	6.72632
HSC	5.18014
HSC	5.51153
HSC	5.79341
HSC	5.95938
HSC	5.52064
HSC	5.91738
