# Supplementary material for: Comprehensive bioinformatic analysis of the expression and prognostic significance of TSC22D domain family genes in acute myeloid leukemia
Source: Research Square preprint supplement (doi:10.21203/rs.3.rs-1209284/v1), 2022-01-14
Supplement: Supplementary file 9 [file e663561248f609f253e2fa3c.xlsx]

## Sheet: TSC22D1 expression in BloodPool
TSC22D1 (log2)	235315_at
HSC	7.85119
HSC	6.82075
HSC	6.40676
HSC	6.67257
HSC	6.43771
HSC	6.11592
Normal	5.86996
Normal	5.92609
Normal	4.60569
Normal	4.32325
Normal	7.72164
Normal	6.32908
Normal	5.38979
Normal	5.19238
Normal	6.58187
Normal	4.94453
Normal	7.70924
Normal	5.75449
Normal	5.54751
Normal	6.83508
Normal	7.13501
Normal	5.48475
Normal	5.94956
Normal	6.10301
Normal	6.6006
Normal	6.45545
Normal	5.00651
Normal	4.0758
Normal	5.00079
Normal	5.49741
Normal	4.03889
Normal	5.45711
Normal	6.87738
Normal	5.94306
Normal	6.15253
Normal	6.51113
Normal	5.64107
Normal	5.26337
Normal	7.2381
Normal	7.52021
Normal	6.58726
Normal	5.80806
Normal	7.15745
Normal	5.93621
Normal	7.50614
Normal	5.9908
Normal	4.46719
Normal	4.88442
Normal	5.86352
Normal	4.65276
Normal	6.44369
Normal	7.33307
Normal	5.29673
Normal	6.22951
Normal	5.97305
Normal	6.15237
Normal	6.20922
Normal	5.62664
Normal	6.83161
Normal	5.52381
Normal	5.87592
Normal	6.15449
Normal	6.58599
Normal	4.61213
Normal	5.44767
Normal	3.11977
Normal	7.21985
Normal	5.3102
Normal	6.56721
Normal	6.77626
Normal	5.68424
Normal	5.28852
Normal	4.09797
Normal	6.98424
Normal	5.35542
Normal	6.24845
Normal	7.24743
Normal	5.6282
Normal	5.63256
Normal	5.84543
Normal	6.33529
Normal	6.66197
Normal	5.94344
Normal	7.05945
Normal	5.94765
Normal	6.42938
Normal	5.67116
Normal	8.06758
Normal	5.90021
Normal	6.95821
Normal	6.4738
Normal	4.65577
Normal	7.09987
Normal	5.36972
Normal	7.3473
Normal	5.04693
Normal	5.59142
Normal	7.80364
Normal	5.24668
Normal	4.69198
Normal	6.20681
Normal	5.11527
Normal	5.71533
Normal	5.44079
Normal	6.40731
Normal	6.39472
Normal	6.50204
Normal	5.60254
Normal	6.87194
Normal	6.35025
Normal	5.56122
Normal	4.15032
Normal	5.45897
Normal	5.73568
Normal	5.07428
Normal	5.9722
Normal	6.3487
Normal	4.75938
Normal	4.81779
Normal	6.2098
Normal	5.64522
Normal	6.34414
Normal	7.99946
Normal	6.65076
Normal	5.32803
Normal	5.96805
Normal	5.70466
Normal	7.46867
Normal	5.74012
Normal	6.06417
Normal	5.51043
Normal	6.29282
Normal	5.20919
Normal	7.36713
Normal	5.4232
Normal	3.96817
Normal	4.10191
Normal	5.31924
Normal	5.54886
Normal	7.46665
Normal	6.68805
Normal	5.78091
Normal	5.5036
Normal	4.32297
Normal	5.83933
Normal	7.21495
Normal	5.7339
Normal	6.15465
Normal	6.81561
Normal	5.17069
Normal	7.01922
Normal	5.74792
Normal	5.49267
Normal	5.96727
Normal	6.92129
Normal	4.16596
Normal	5.91866
Normal	5.6065
Normal	5.87892
Normal	6.27092
Normal	5.1425
Normal	5.4763
Normal	6.29697
Normal	5.72925
Normal	5.95428
Normal	5.34014
Normal	4.118
Normal	5.00272
Normal	5.47655
Normal	4.93887
Normal	6.6153
Normal	5.15728
Normal	6.65154
Normal	5.6397
Normal	6.68954
Normal	5.09568
Normal	5.66741
Normal	4.92474
Normal	4.63015
Normal	5.43915
Normal	6.02956
Normal	5.71405
Normal	5.4275
Normal	4.65885
Normal	5.95787
Normal	5.1447
Normal	4.35271
Normal	5.76882
Normal	6.02464
Normal	7.82064
Normal	5.11759
Normal	5.01825
Normal	6.31628
Normal	3.70019
Normal	6.65116
Normal	5.68394
Normal	7.38898
Normal	5.94653
Normal	6.44705
Normal	6.21071
Normal	5.07379
Normal	8.548
Normal	7.34347
Normal	6.46032
Normal	5.84032
Normal	6.29851
Normal	7.18831
Normal	6.59499
Normal	5.58945
Normal	5.70264
Normal	5.27491
Normal	5.55429
Normal	6.31985
Normal	6.04473
Normal	6.05707
Normal	6.63977
Normal	6.37703
Normal	5.88269
Normal	5.85103
Normal	5.58989
Normal	4.50799
Normal	6.25803
Normal	7.05949
Normal	6.12907
Normal	6.7524
Normal	6.14707
Normal	6.97177
Normal	5.66005
Normal	7.02358
Normal	5.21791
Normal	6.60312
Normal	6.30843
Normal	6.45333
Normal	5.56537
Normal	5.18291
Normal	7.54698
Normal	4.53065
Normal	6.84653
Normal	5.39705
Normal	6.34982
Normal	3.63223
Normal	5.86248
Normal	6.5826
Normal	5.02809
Normal	7.49921
Normal	6.08159
Normal	4.3885
Normal	6.34505
Normal	7.41455
Normal	4.60418
Normal	5.96389
Normal	7.46649
Normal	6.74518
Normal	7.30434
Normal	7.63014
Normal	5.86759
Normal	6.48641
Normal	5.19907
Normal	6.00299
Normal	5.50335
Normal	5.31158
Normal	6.93942
Normal	5.8389
Normal	6.88174
Normal	6.64006
Normal	5.76232
Normal	5.98448
Normal	6.28122
Normal	5.83148
Normal	6.26499
Normal	4.64293
Normal	7.77933
Normal	7.24183
Normal	5.86484
Normal	7.32067
Normal	5.86157
Normal	8.11242
Normal	5.2017
Normal	7.08936
Normal	4.24924
Normal	6.95632
Normal	5.94586
Normal	5.19557
Normal	5.30819
Normal	6.15547
Normal	5.02542
Normal	4.31279
Normal	4.69371
Normal	6.19914
Normal	6.31565
Normal	6.59128
Normal	6.59253
Normal	5.26926
Normal	5.01731
Normal	6.04396
Normal	6.47842
Normal	7.06587
Normal	7.38241
Normal	4.76687
Normal	5.39628
Normal	7.46809
Normal	5.28804
Normal	6.20793
Normal	5.90676
Normal	5.59245
Normal	5.64368
Normal	7.71332
Normal	7.0685
Normal	4.52334
Normal	4.50769
Normal	6.37896
Normal	6.47404
Normal	5.20281
Normal	5.04834
Normal	4.35631
Normal	4.80489
Normal	5.0657
Normal	7.46076
Normal	7.40352
Normal	5.53183
Normal	7.09215
Normal	4.49927
Normal	6.28187
Normal	5.00681
Normal	6.39428
Normal	6.05598
Normal	4.79922
Normal	6.79217
Normal	5.11912
Normal	7.16958
Normal	4.73382
Normal	5.60867
Normal	6.86274
Normal	6.98697
Normal	6.58816
Normal	6.2178
Normal	6.22486
Normal	6.46504
Normal	5.82363
Normal	7.24958
Normal	5.51804
Normal	5.95575
Normal	6.12438
Normal	6.16979
Normal	7.69468
Normal	5.84534
Normal	5.38926
Normal	6.52076
Normal	5.477
Normal	7.25629
Normal	5.38898
Normal	5.99712
Normal	4.37094
Normal	5.75559
Normal	5.77567
Normal	4.84801
Normal	4.08272
Normal	7.42995
Normal	7.26376
Normal	7.70417
Normal	6.24217
Normal	5.3226
Normal	6.53275
Normal	6.15846
Normal	5.55265
Normal	7.07718
Normal	5.28455
Normal	5.87223
Normal	7.01436
Normal	3.52654
Normal	4.90172
Normal	7.18899
Normal	6.73748
Normal	4.99863
Normal	7.11844
Normal	5.20036
Normal	5.01087
Normal	6.55931
Normal	6.24263
Normal	6.18288
Normal	6.37951
Normal	6.50823
Normal	7.13807
Normal	6.24856
Normal	5.64591
Normal	4.98627
Normal	5.51912
Normal	6.29469
Normal	6.13965
Normal	5.60648
Normal	5.40607
Normal	4.84403
Normal	4.7141
Normal	6.36096
Normal	4.93366
Normal	6.8246
Normal	5.86488
Normal	6.17744
Normal	5.53025
Normal	7.10571
Normal	6.46652
Normal	7.17885
Normal	7.09305
Normal	5.65787
Normal	6.67213
Normal	5.52605
Normal	7.29816
Normal	6.38235
Normal	5.49603
Normal	4.43747
Normal	5.94953
Normal	5.51092
Normal	5.99422
Normal	6.18593
Normal	3.91049
Normal	5.74714
Normal	4.98219
Normal	5.61124
Normal	5.52565
Normal	5.66497
Normal	6.23339
Normal	4.93619
Normal	5.41329
Normal	6.51628
Normal	5.38777
Normal	7.07538
Normal	5.99624
Normal	6.86042
Normal	6.6343
Normal	6.35434
Normal	6.69912
Normal	5.6546
Normal	6.07351
Normal	5.87739
Normal	6.78225
Normal	5.21674
Normal	5.42329
Normal	5.4227
Normal	6.19309
Normal	5.62398
Normal	6.04493
Normal	6.23611
Normal	5.59512
Normal	5.98352
Normal	6.67602
Normal	5.79983
Normal	4.88594
Normal	6.14268
Normal	6.08549
Normal	6.00242
Normal	6.85013
Normal	6.36758
Normal	6.33777
Normal	6.02681
Normal	5.87366
Normal	6.0618
Normal	5.49774
Normal	5.10956
Normal	6.78329
Normal	6.59389
Normal	5.94899
Normal	5.32417
Normal	6.88131
Normal	5.99849
Normal	4.87243
Normal	5.55433
Normal	6.96896
Normal	5.92774
Normal	5.90515
Normal	6.00646
Normal	5.93071
Normal	5.69806
Normal	5.87192
Normal	6.96829
Normal	6.83398
Normal	6.54539
Normal	6.67708
Normal	4.90376
Normal	5.88092
Normal	6.65895
Normal	6.07318
Normal	7.04104
Normal	6.17389
Normal	5.71011
Normal	5.67643
Normal	6.69878
Normal	6.80484
Normal	5.61602
Normal	6.37789
Normal	6.62066
Normal	6.65254
Normal	5.86263
Normal	6.4208
Normal	4.78766
Normal	5.051
Normal	6.63168
Normal	6.97741
Normal	5.16105
Normal	6.87963
Normal	5.90111
Normal	5.59231
Normal	6.37868
Normal	6.21816
Normal	6.07954
Normal	5.65338
Normal	5.42382
Normal	6.01824
Normal	6.7373
Normal	5.02191
Normal	5.89135
Normal	5.09424
Normal	4.65563
Normal	6.58065
Normal	5.52364
Normal	7.56646
Normal	6.37849
Normal	5.41244
Normal	6.34374
Normal	6.86509
Normal	5.86023
Normal	5.88164
Normal	5.38524
Normal	5.53857
Normal	6.70322
Normal	5.69213
Normal	6.4269
Normal	5.60629
Normal	5.6857
Normal	5.32075
Normal	5.24219
Normal	5.24991
Normal	5.61253
Normal	7.21174
Normal	4.52168
Normal	4.11021
Normal	4.59234
Normal	6.83928
Normal	7.01878
Normal	6.51151
Normal	6.49767
Normal	6.82736
Normal	5.84082
Normal	5.69665
Normal	5.12056
Normal	5.09759
Normal	5.22638
Normal	7.14984
Normal	4.95732
Normal	4.62178
Normal	4.84537
Normal	5.42643
Normal	4.70255
Normal	6.33611
Normal	4.81698
Normal	5.01023
Normal	5.21526
Normal	4.15695
Normal	3.87612
Normal	4.24873
Normal	5.38197
Normal	3.94198
Normal	5.19776
Normal	5.45449
Normal	5.33141
Normal	6.41265
Normal	5.22775
Normal	5.78448
Normal	6.22716
Normal	6.61469
Normal	6.86653
Normal	5.61561
Normal	6.49574
Normal	7.58339
Normal	6.64893
Normal	7.81117
Normal	6.7864
Normal	7.08554
Normal	4.54272
Normal	4.11048
Normal	4.53543
Normal	6.06487
Normal	4.40951
Normal	4.39195
Normal	4.69814
Normal	5.33147
Normal	6.45577
Normal	6.44032
Normal	6.62737
Normal	7.17143
Normal	5.79264
Normal	6.63388
Normal	5.53939
Normal	6.12756
Normal	3.88362
Normal	6.08081
Normal	5.52779
Normal	4.24716
Normal	4.89395
Normal	4.64321
Normal	5.75138
Normal	6.21892
Normal	5.74801
Normal	5.46618
Normal	4.30523
Normal	5.38492
Normal	4.38206
Normal	5.58611
Normal	4.50575
Normal	4.94867
Normal	5.78541
Normal	5.09065
Normal	6.20383
Normal	4.47122
Normal	6.24386
Normal	6.89397
Normal	6.29624
Normal	6.82074
Normal	4.23246
Normal	6.66555
Normal	6.35234
Normal	6.51611
Normal	6.15607
Normal	6.40176
Normal	6.45674
Normal	5.18901
Normal	5.58683
Normal	4.08413
Normal	7.30342
Normal	5.35392
Normal	6.89056
Normal	6.33486
Normal	6.43792
Normal	6.6046
Normal	5.81018
Normal	5.21683
Normal	4.89417
Normal	5.86074
Normal	5.59887
Normal	5.45648
Normal	5.70752
Normal	5.73639
Normal	6.25027
Normal	6.09454
Normal	5.54437
Normal	5.9211
Normal	5.28365
Normal	6.55855
Normal	6.29762
Normal	6.2334
Normal	5.19584
Normal	5.88717
Normal	7.07113
Normal	5.23824
Normal	5.53603
Normal	4.46255
Normal	5.88151
Normal	5.66547
Normal	6.73277
Normal	4.58263
Normal	5.56585
Normal	5.18415
Normal	6.24123
Normal	5.48059
Normal	6.01627
Normal	6.46679
Normal	4.44297
Normal	5.84959
Normal	6.64538
Normal	3.95561
Normal	6.58095
Normal	7.18428
Normal	5.73088
Normal	7.21932
Normal	5.58711
Normal	6.20426
Normal	6.39046
Normal	6.45765
Normal	5.21556
Normal	5.58353
Normal	6.34325
Normal	7.00518
Normal	6.73899
Normal	5.89622
Normal	6.62087
Normal	6.81919
Normal	6.31423
Normal	3.73552
Normal	7.43721
Normal	6.2827
Normal	5.85224
Normal	5.76511
Normal	6.1714
Normal	5.43181
Normal	6.0961
Normal	6.02439
Normal	4.54964
Normal	5.37088
Normal	6.31934
Normal	5.87168
Normal	5.9982
Normal	4.58741
Normal	5.60894
Normal	6.24958
Normal	5.68372
Normal	6.46165
Normal	3.70218
Normal	5.56004
Normal	6.48101
Normal	5.95574
Normal	5.20991
Normal	4.58844
Normal	5.16173
Normal	4.33397
Normal	5.67462
Normal	4.5068
Normal	4.3492
Normal	4.73925
Normal	4.92641
Normal	5.41587
Normal	6.25395
Normal	5.37221
Normal	5.77094
Normal	5.00347
Normal	6.21142
Normal	5.37793
Normal	4.21681
Normal	5.13506
Normal	4.78758
Normal	5.26944
Normal	4.87749
Normal	4.72587
Normal	6.64813
Normal	6.44335
Normal	4.72431
Normal	4.64533
Normal	6.14723
Normal	5.8299
Normal	4.59433
Normal	6.44845
Normal	6.30995
Normal	6.86969
Normal	5.8753
Normal	6.53508
Normal	4.46849
Normal	5.59544
Normal	7.00617
Normal	5.33547
Normal	5.26553
Normal	5.61232
Normal	7.15935
Normal	6.02291
Normal	5.38413
Normal	5.72205
Normal	4.252
Normal	6.14855
Normal	4.7688
Normal	7.43673
Normal	7.25158
Normal	6.75871
Normal	6.18524
Normal	4.3844
Normal	6.57157
Normal	6.73569
Normal	6.56318
Normal	6.07307
Normal	6.48407
Normal	6.00631
Normal	5.74206
Normal	6.57987
Normal	6.49212
Normal	7.03673
Normal	7.29103
Normal	6.53207
Normal	5.02276
Normal	7.05648
Normal	7.06448
Normal	7.07117
Normal	6.36359
Normal	7.32733
Normal	5.20216
Normal	6.23199
Normal	5.89226
Normal	7.25946
Normal	6.23361
Normal	7.17314
Normal	5.17669
Normal	6.48162
Normal	5.33149
Normal	6.03827
Normal	6.56168
Normal	5.71096
Normal	6.00478
Normal	6.47916
Normal	7.16711
Normal	6.32717
Normal	6.38763
Normal	5.85791
Normal	5.5663
Normal	5.88489
Normal	6.5103
Normal	6.51943
Normal	6.70039
Normal	6.29479
Normal	7.11648
Normal	7.06019
Normal	6.12038
Normal	5.82749
Normal	7.67263
Normal	6.38813
Normal	6.49802
Normal	5.81953
Normal	5.63906
Normal	6.08119
Normal	6.18149
Normal	6.77182
Normal	5.00862
Normal	6.12179
Normal	5.20681
Normal	5.5533
Normal	7.46013
Normal	5.39192
Normal	6.97002
Normal	5.63411
Normal	6.00994
Normal	6.10781
Normal	5.70891
Normal	6.01726
Normal	6.05494
Normal	5.50767
Normal	5.60778
Normal	5.87098
Normal	5.95023
Normal	5.95145
Normal	5.91928
Normal	6.17842
Normal	5.13061
Normal	6.09075
Normal	6.02561
Normal	4.30567
Normal	5.43174
Normal	5.04581
Normal	6.23509
Normal	5.12085
Normal	5.92988
Normal	6.80489
Normal	5.10916
Normal	5.52698
Normal	4.79358
Normal	6.34357
Normal	6.06418
Normal	5.56762
Normal	5.61606
Normal	5.50416
Normal	4.8514
Normal	5.67844
Normal	6.08162
Normal	5.62065
Normal	6.1953
Normal	6.86067
Normal	6.26363
Normal	6.49439
Normal	5.72206
Normal	6.33799
Normal	5.97637
Normal	5.20352
Normal	5.2791
Normal	4.92388
Normal	5.71545
Normal	5.54361
Normal	5.48438
Normal	5.3142
Normal	4.58932
Normal	5.82235
Normal	5.52042
Normal	5.75556
Normal	5.49658
Normal	6.91454
Normal	4.92916
Normal	6.41689
Normal	4.70746
Normal	5.86207
Normal	6.41152
Normal	4.95332
Normal	6.90659
Normal	6.2467
Normal	7.35884
Normal	5.01449
Normal	6.9332
Normal	6.49762
Normal	6.32533
Normal	6.32098
Normal	4.68444
Normal	6.38425
Normal	4.52679
Normal	5.7018
Normal	4.94968
Normal	7.04464
Normal	5.61428
Normal	7.05537
Normal	5.53451
Normal	5.90756
Normal	5.76787
Normal	5.80362
Normal	7.25442
Normal	4.27851
Normal	7.09951
Normal	4.8296
Normal	6.09132
Normal	5.74351
Normal	6.9074
Normal	6.78691
Normal	6.46445
Normal	5.93636
Normal	5.39831
Normal	5.00825
Normal	5.18083
Normal	4.22159
Normal	4.41121
Normal	5.50015
Normal	4.46944
Normal	6.52262
Normal	4.83494
Normal	5.13311
Normal	4.49515
Normal	7.32095
Normal	6.90116
Normal	5.8806
Normal	6.00683
Normal	5.05107
Normal	6.39427
Normal	6.41619
Normal	7.82173
Normal	7.14206
Normal	6.31696
Normal	6.56666
Normal	6.57055
Normal	6.15378
Normal	5.42156
Normal	5.40172
Normal	8.07887
Normal	6.18113
Normal	5.74871
Normal	5.58815
Normal	5.92291
Normal	6.88964
Normal	8.05337
Normal	6.60555
Normal	5.18586
Normal	6.54031
Normal	6.54281
Normal	6.06668
Normal	5.34347
Normal	7.17234
Normal	6.60948
Normal	6.52578
Normal	6.50474
Normal	6.77796
Normal	5.14125
Normal	6.52117
Normal	4.91903
Normal	4.02335
Normal	7.84286
Normal	6.68142
Normal	6.55152
Normal	6.11973
Normal	4.34305
Normal	6.50819
Normal	5.35666
Normal	6.40043
Normal	4.16697
Normal	5.33699
Normal	4.94133
Normal	5.95385
Normal	6.63362
Normal	5.50243
Normal	4.70386
Normal	5.13032
Normal	5.08264
Normal	6.37533
Normal	6.25004
Normal	7.25741
Normal	5.91862
Normal	7.65006
Normal	6.9353
Normal	5.56236
Normal	5.65663
Normal	6.791
Normal	7.56297
Normal	6.51599
Normal	6.54226
Normal	7.00389
Normal	5.14903
Normal	4.67555
Normal	5.69428
Normal	4.55273
Complex	7.16233
Complex	5.53946
Complex	4.37352
Complex	5.16562
Complex	5.20938
Complex	5.64225
Complex	5.55653
Complex	4.24469
Complex	5.86847
Complex	4.56528
Complex	6.8646
Complex	5.91006
Complex	6.70466
Complex	4.78873
Complex	6.52146
Complex	5.72173
Complex	6.10505
Complex	6.65557
Complex	6.09585
Complex	4.51358
Complex	5.78185
Complex	7.35536
Complex	6.17636
Complex	4.5448
Complex	5.20865
Complex	5.88616
Complex	6.0209
Complex	5.68558
Complex	5.75898
Complex	5.75178
Complex	5.73927
Complex	6.2037
Complex	5.87789
Complex	4.47273
Complex	4.34706
Complex	4.76668
Complex	5.92689
Complex	5.34201
Complex	5.61773
Complex	6.82347
Complex	5.32582
Complex	6.17368
Complex	6.61876
Complex	5.05026
Complex	6.26468
Complex	4.30416
Complex	7.71054
Complex	5.87344
Complex	6.00421
Complex	5.18984
Complex	6.7009
Complex	5.53507
Complex	5.49355
Complex	5.27891
Complex	5.43921
Complex	6.14298
Complex	4.91669
Complex	6.57456
Complex	5.74486
Complex	6.17851
Complex	6.17957
Complex	7.37051
Complex	8.00971
Complex	7.33009
Complex	6.67396
Complex	5.37905
Complex	6.00637
Complex	4.59558
Complex	7.3479
Complex	6.24082
Complex	6.63319
Complex	6.72798
Complex	5.36219
Complex	5.87548
Complex	5.85893
Complex	4.69667
Complex	3.98442
Complex	6.20945
Complex	5.76762
Complex	6.13824
Complex	5.9517
Complex	5.21872
Complex	5.89285
Complex	5.40408
Complex	6.748
Complex	6.7124
Complex	6.91761
inv(16)	5.94742
inv(16)	5.94114
inv(16)	5.32031
inv(16)	6.44104
inv(16)	5.13942
inv(16)	6.02063
inv(16)	6.13034
inv(16)	6.52309
inv(16)	6.13457
inv(16)	5.81192
inv(16)	6.0605
inv(16)	5.78785
inv(16)	6.45317
inv(16)	6.37711
inv(16)	6.20758
inv(16)	5.60905
inv(16)	5.78892
inv(16)	6.39819
inv(16)	7.45811
inv(16)	6.21537
inv(16)	6.40257
inv(16)	6.03549
inv(16)	6.41758
inv(16)	5.79289
inv(16)	5.67241
inv(16)	7.45988
inv(16)	5.60672
inv(16)	5.69798
inv(16)	5.60038
inv(16)	6.13378
inv(16)	6.00565
inv(16)	6.2715
inv(16)	5.84103
inv(16)	5.4206
inv(16)	5.86048
inv(16)	6.23837
inv(16)	6.22199
inv(16)	5.14576
inv(16)	6.17106
inv(16)	6.05375
inv(16)	6.47807
inv(16)	6.56662
inv(16)	6.96251
inv(16)	4.54603
inv(16)	5.61597
inv(16)	6.19502
inv(16)	4.67228
inv(16)	5.93646
inv(16)	4.82384
inv(16)	5.96168
inv(16)	5.86559
inv(16)	5.37506
inv(16)	6.36706
inv(16)	5.56553
inv(16)	5.35573
inv(16)	6.58664
inv(16)	5.84001
inv(16)	6.33869
inv(16)	5.70622
inv(16)	5.48322
inv(16)	6.07016
inv(16)	5.32591
inv(16)	5.8014
inv(16)	6.43005
inv(16)	6.65968
inv(16)	5.24513
inv(16)	5.75555
inv(16)	6.90537
inv(16)	6.00093
inv(16)	4.39071
inv(16)	6.06124
inv(16)	6.94999
inv(16)	6.78081
inv(16)	6.96484
inv(16)	5.91956
inv(16)	6.51561
inv(16)	6.25787
t(15;17)	4.47035
t(15;17)	6.01101
t(15;17)	4.02462
t(15;17)	5.90083
t(15;17)	5.68253
t(15;17)	5.69279
t(15;17)	5.22052
t(15;17)	6.37332
t(15;17)	5.60455
t(15;17)	6.01306
t(15;17)	6.41045
t(15;17)	4.62516
t(15;17)	5.64529
t(15;17)	5.82351
t(15;17)	6.5001
t(15;17)	5.11666
t(15;17)	5.68976
t(15;17)	6.9689
t(15;17)	5.60219
t(15;17)	5.27093
t(15;17)	6.50923
t(15;17)	6.04706
t(15;17)	4.1025
t(15;17)	5.99526
t(15;17)	6.19022
t(15;17)	5.68999
t(15;17)	6.58296
t(15;17)	6.82784
t(15;17)	4.96919
t(15;17)	6.30918
t(15;17)	6.14021
t(15;17)	4.91944
t(15;17)	5.44827
t(15;17)	4.4378
t(15;17)	4.4649
t(15;17)	5.74991
t(15;17)	6.00309
t(15;17)	5.17803
t(15;17)	6.14515
t(15;17)	5.06523
t(15;17)	6.07663
t(15;17)	5.38823
t(15;17)	5.78702
t(15;17)	5.94554
t(15;17)	5.76051
t(15;17)	6.04821
t(15;17)	4.57345
t(15;17)	6.48547
t(15;17)	5.58386
t(15;17)	6.50482
t(15;17)	5.97955
t(15;17)	4.61011
t(15;17)	4.13591
t(15;17)	5.08583
t(15;17)	6.0827
t(15;17)	5.55115
t(15;17)	4.50364
t(15;17)	5.56092
t(15;17)	5.49916
t(15;17)	6.43559
t(15;17)	6.95917
t(15;17)	6.13416
t(15;17)	6.34392
t(15;17)	5.25143
t(15;17)	5.67279
t(15;17)	7.0786
t(15;17)	5.85048
t(15;17)	5.67257
t(15;17)	4.99305
t(15;17)	5.98163
t(15;17)	6.1545
t(15;17)	5.60169
t(15;17)	5.87964
t(15;17)	6.01555
t(15;17)	5.01875
t(15;17)	4.816
t(15;17)	4.90214
t(15;17)	4.38761
t(15;17)	6.09428
t(15;17)	5.81323
t(15;17)	5.45027
t(15;17)	7.12033
t(15;17)	6.36996
t(15;17)	6.2109
t(15;17)	6.14344
t(15;17)	7.09508
t(15;17)	5.8313
t(8;21)	6.82068
t(8;21)	7.13118
t(8;21)	5.4975
t(8;21)	6.39074
t(8;21)	7.2947
t(8;21)	6.99273
t(8;21)	5.5936
t(8;21)	7.5541
t(8;21)	6.63654
t(8;21)	6.8573
t(8;21)	5.60303
t(8;21)	5.99853
t(8;21)	5.49809
t(8;21)	5.67735
t(8;21)	7.00477
t(8;21)	7.25245
t(8;21)	6.82955
t(8;21)	7.29171
t(8;21)	5.31647
t(8;21)	7.69698
t(8;21)	7.48605
t(8;21)	6.70278
t(8;21)	5.61104
t(8;21)	5.60933
t(8;21)	5.42961
t(8;21)	5.63943
t(8;21)	6.06564
t(8;21)	5.77151
t(8;21)	5.62092
t(8;21)	5.26246
t(8;21)	5.83827
t(8;21)	6.03077
t(8;21)	6.45341
t(8;21)	4.14879
t(8;21)	5.46739
t(8;21)	6.37641
t(8;21)	5.8676
t(8;21)	5.96641
t(8;21)	5.96444
t(8;21)	6.42504
t(8;21)	5.62575
t(8;21)	5.41331
t(8;21)	6.19442
t(8;21)	6.78011
t(8;21)	5.95889
t(8;21)	6.78282
t(8;21)	6.58527
t(8;21)	6.03971
t(8;21)	5.72641
t(8;21)	4.31294
t(8;21)	5.50868
t(8;21)	5.38658
t(8;21)	5.7685
t(8;21)	6.21145
t(8;21)	6.09745
t(8;21)	5.97497
t(8;21)	6.66261
t(8;21)	6.19597
t(8;21)	6.73802
t(8;21)	7.41322
t(8;21)	6.92805
t(8;21)	7.01548
t(8;21)	7.16407
t(8;21)	6.61231
t(8;21)	6.79228
t(8;21)	7.06523
t(8;21)	6.23156
t(8;21)	5.39112
t(8;21)	5.40957
t(8;21)	6.11038
t(8;21)	6.26084
t(8;21)	5.53049
t(8;21)	6.6746
t(8;21)	6.47213
t(8;21)	5.88727
t(8;21)	6.35014
t(8;21)	6.78292
t(8;21)	6.01348
t(8;21)	6.16502
t(8;21)	5.62611
t(8;21)	6.03279
t(8;21)	6.11279
t(8;21)	6.36884
t(8;21)	6.75762
t(8;21)	6.63787
t(8;21)	6.91002
t(8;21)	5.65063
t(8;21)	6.41758
t(8;21)	7.39739
t(8;21)	5.91542
t(8;21)	7.52994
t(8;21)	6.26626
t(8;21)	7.26617
t(8;21)	6.44118
t(8;21)	7.19081
t(8;21)	5.95249
t(8;21)	6.19198
t(8;21)	6.88771
t(11q23)/MLL	4.55927
t(11q23)/MLL	7.02776
t(11q23)/MLL	5.58519
t(11q23)/MLL	6.35695
t(11q23)/MLL	4.00424
t(11q23)/MLL	4.6568
t(11q23)/MLL	3.13937
t(11q23)/MLL	6.11678
t(11q23)/MLL	5.21791
t(11q23)/MLL	4.68399
t(11q23)/MLL	4.57668
t(11q23)/MLL	6.72695
t(11q23)/MLL	3.95519
t(11q23)/MLL	3.74288
t(11q23)/MLL	6.80148
t(11q23)/MLL	5.98293
t(11q23)/MLL	5.38867
t(11q23)/MLL	6.19226
t(11q23)/MLL	3.22193
t(11q23)/MLL	4.07283
t(11q23)/MLL	7.80617
t(11q23)/MLL	3.67795
t(11q23)/MLL	4.59442
t(11q23)/MLL	4.30775
t(11q23)/MLL	3.51412
t(11q23)/MLL	5.58599
t(11q23)/MLL	5.79004
t(11q23)/MLL	5.58278
t(11q23)/MLL	4.56203
t(11q23)/MLL	5.05269
t(11q23)/MLL	4.7721
t(11q23)/MLL	3.96767
t(11q23)/MLL	5.12413
t(11q23)/MLL	5.67627
t(11q23)/MLL	6.21247
t(11q23)/MLL	5.29484
t(11q23)/MLL	6.03861
t(11q23)/MLL	6.64437
t(11q23)/MLL	4.34526
t(11q23)/MLL	4.23407
t(11q23)/MLL	5.67186
t(11q23)/MLL	5.72453
t(11q23)/MLL	6.06457
t(11q23)/MLL	7.2226
t(11q23)/MLL	5.95796
t(11q23)/MLL	5.3912
t(11q23)/MLL	5.93438
t(11q23)/MLL	5.49833
t(11q23)/MLL	6.45941
t(11q23)/MLL	4.98855
t(11q23)/MLL	5.99483
t(11q23)/MLL	4.50858
t(11q23)/MLL	6.91414
t(11q23)/MLL	4.12812
t(11q23)/MLL	6.12094
t(11q23)/MLL	5.57847
t(11q23)/MLL	7.15147
t(11q23)/MLL	5.74756
nan	5.60477
nan	6.04922
nan	6.02516
nan	5.45721
nan	6.6818
nan	6.53298
nan	6.36767
nan	5.70532
nan	6.01308
nan	4.93163
nan	5.17801
nan	6.43384
nan	5.15422
nan	6.65377
nan	6.60207
nan	6.06065
nan	5.28715
nan	4.32867
nan	7.41513
nan	6.28949
nan	5.12389
nan	4.50335
nan	4.37136
nan	5.15917
nan	5.69588
nan	4.82134
nan	6.29526
nan	6.68546
nan	6.06491
nan	6.16988
nan	4.46179
nan	6.84468
nan	5.91671
nan	6.80838
nan	6.87556
nan	6.47507
nan	5.4163
nan	6.53626
nan	4.58928
nan	4.61831
nan	7.03618
nan	5.40314
nan	7.35495
nan	7.60934
nan	6.76753
nan	4.63331
nan	5.66219
nan	7.03504
nan	6.37231
nan	4.84689
nan	7.41001
nan	6.04059
nan	6.14469
nan	4.66658
nan	6.24065
nan	5.50267
nan	6.0338
nan	5.65967
nan	6.22752
nan	4.88552
nan	4.14752
nan	5.35668
nan	6.73623
nan	5.24044
nan	4.43535
nan	6.28369
nan	6.49121
nan	4.60438
nan	6.05584
nan	6.46096
nan	5.19122
nan	5.02199
nan	6.27663
nan	5.70215
nan	6.61796
nan	7.25859
nan	5.78654
nan	8.89845
nan	6.06178
nan	7.36189
nan	5.01096
nan	6.94517
nan	7.0643
nan	6.23177
nan	6.60272
nan	6.37212
nan	5.7341
nan	5.86958
nan	5.26378
nan	5.44247
nan	5.56688
nan	5.17905
nan	5.60941
nan	6.48223
nan	5.70458
nan	5.92873
nan	5.30218
nan	5.99825
nan	5.67936
nan	5.67338
nan	5.01833
nan	5.00227
nan	5.04219
nan	5.94743
nan	6.26554
nan	6.05009
nan	6.33308
nan	4.77176
nan	4.22648
nan	6.56952
nan	6.38334
nan	5.27184
nan	7.09149
nan	7.22495
nan	5.34243
nan	5.54449
nan	5.85497
nan	5.51469
Trisomy 8	7.23273
Trisomy 8	7.23062
Trisomy 8	6.47122
Trisomy 8	5.58815
Trisomy 8	5.4219
Trisomy 8	6.41313
Trisomy 8	5.28746
Trisomy 8	6.8359
Trisomy 8	5.44776
Trisomy 8	3.75224
Trisomy 8	7.45393
Trisomy 8	6.58311
Trisomy 8	6.18812
Trisomy 8	8.01826
Trisomy 8	7.33864
Trisomy 8	6.33606
Trisomy 8	4.60413
Trisomy 8	6.64174
Trisomy 8	6.73653
Trisomy 8	5.97245
Trisomy 8	5.31913
Trisomy 8	4.98945
Trisomy 8	5.95602
Trisomy 8	5.28232
Trisomy 8	5.48732
Trisomy 8	4.42684
Trisomy 8	5.72213
Trisomy 8	4.59272
Trisomy 8	4.35454
Trisomy 8	4.23412
Trisomy 8	5.46805
Trisomy 8	4.49652
del(5q)	6.27329
del(5q)	5.43631
del(5q)	5.38197
del(5q)	6.08574
del(5q)	4.85945
del(5q)	6.51732
del(5q)	6.12128
del(5q)	7.31327
del(5q)	7.27285
del(5q)	6.61672
del(5q)	5.65804
del(5q)	7.29066
del(5q)	5.55987
del(5q)	6.18358
del(5q)	6.67074
del(5q)	6.01292
del(5q)	6.58119
del(5q)	6.96142
del(5q)	6.4093
del(5q)	7.18593
del(5q)	7.20201
del(7q)/7q-	6.89709
del(7q)/7q-	5.98848
del(7q)/7q-	7.5963
del(7q)/7q-	5.89052
del(7q)/7q-	5.42535
del(7q)/7q-	6.30853
del(7q)/7q-	6.12912
del(7q)/7q-	4.90283
del(7q)/7q-	6.16465
del(7q)/7q-	5.75941
del(7q)/7q-	7.35665
del(7q)/7q-	6.0904
del(7q)/7q-	5.99251
del(7q)/7q-	4.58172
del(7q)/7q-	5.70142
del(7q)/7q-	5.60324
del(7q)/7q-	6.61932
del(7q)/7q-	6.71411
del(7q)/7q-	3.69649
del(7q)/7q-	5.95004
t(9;11)	6.09841
t(9;11)	5.68604
Other	5.22792
Other	5.40026
Other	5.57526
Other	6.6001
Other	6.99524
Other	5.71437
Other	5.93381
Other	6.18405
Other	6.97221
Other	6.72109
Other	6.17608
Other	5.11064
Other	6.00133
Other	5.66107
Other	5.20885
Other	7.60112
Other	6.81398
Other	4.74074
Other	6.21867
Other	6.33311
Other	7.0842
Other	7.65412
Other	5.58443
Other	5.98194
Other	4.89148
Other	6.01105
Other	5.1138
Other	5.80015
Other	6.07418
Other	6.7755
Other	5.76757
Other	5.86791
Other	7.85694
Other	6.98396
Other	6.03051
Other	7.20665
Other	5.60494
Other	4.91708
Other	5.36119
Other	5.87247
Other	4.5158
Other	7.64291
Other	6.07445
Other	5.6237
Other	6.28921
Other	4.88009
Other	6.80795
Other	4.30704
Other	6.16686
Other	4.58682
Other	4.68784
Other	5.81875
Other	6.24983
Other	6.46214
Other	3.95276
Other	6.46867
Other	7.525
Other	7.81812
Other	6.27949
Other	6.53546
Other	3.68011
Other	3.91689
Other	5.04221
Other	5.79795
Other	5.83919
Other	5.75965
Other	4.22711
Other	6.3599
Other	7.2841
Other	6.43541
Other	6.22547
Other	6.72694
Other	6.20758
Other	5.28542
Other	5.12123
Other	6.13397
Other	5.87067
Other	5.39252
Other	5.32709
Other	6.16979
Other	6.39978
Other	6.43298
Other	5.91885
Other	4.01795
Other	6.11012
Other	6.39305
Other	7.20158
Other	5.47301
Other	5.09168
Other	7.37394
Other	6.35256
7	6.66319
7	5.36811
7	6.12605
7	5.94381
7	4.95919
7	5.62974
7	5.47047
7	5.49515
Complex_ del(5q)	4.17498
Complex_ del(5q)	5.25026
Complex_ del(5q)	5.69218
Complex_ del(5q)	5.29994
Complex_ del(5q)	6.33758
Complex_ del(5q)	4.61809
Complex_ del(5q)	5.04399
Complex_ del(5q)	7.02384
Complex_ del(5q)	6.17962
Complex_ del(5q)	6.24312
Complex_ del(5q)	4.86414
Complex_ del(5q)	4.43409
Complex_ del(5q)	7.31365
Complex_ del(5q)	5.02748
Complex_ del(5q)	6.68528
Complex_ del(5q)	5.18678
Complex_ del(5q)	6.20977
Complex_ del(5q)	5.97463
Complex_ del(5q)	7.2695
Complex_ del(5q)	4.57701
Complex_ del(5q)	6.40473
Complex_ del(5q)	5.8857
Complex_ del(5q)	7.38722
Complex_ del(5q)	6.0126
Complex_ del(5q)	6.03221
Complex_ del(5q)	4.30904
Complex_ del(5q)	5.34422
Complex_ del(5q)	5.24956
Complex_ del(5q)	7.38939
Complex_ del(5q)	6.68097
Complex_ del(5q)	5.48578
Complex_ del(5q)	6.1912
Complex_ del(5q)	4.24138
Complex_ del(5q)	6.36295
Complex_ del(5q)	7.09835
Complex_ del(5q)	6.6018
Complex_ del(5q)	6.65024
Complex_ del(5q)	5.86901
Complex_ del(5q)	6.58291
Complex_ del(5q)	6.21211
Complex_ untypical	4.72491
Complex_ untypical	4.99656
Complex_ untypical	6.15664
Complex_ untypical	7.15307
Complex_ untypical	6.05411
Complex_ untypical	6.17199
Complex_ untypical	7.64809
Complex_ untypical	7.82468
Complex_ untypical	6.27774
Complex_ untypical	5.23431
Complex_ untypical	7.3749
inv(3)	5.37068
inv(3)	8.52934
inv(3)	6.65603
trisomy 11	4.62243
trisomy 13	5.58043
trisomy 13	7.18398
trisomy 13	6.93698
trisomy 13	7.93598
trisomy 13	6.0701
trisomy 13	5.62645
trisomy 13	7.02884
trisomy 13	7.79864
trisomy 13	6.24754
trisomy 13	6.93969
t(6;9)	5.24991
t(6;9)	6.50942
t(6;9)	6.19259
t(6;9)	6.74709
t(6;9)	6.40992
t(6;9)	6.60498
t(6;9)	5.92099
t(6;9)	5.79589
t(6;9)	6.12396
t(8;16)	6.36041
t(8;16)	4.97702
t(8;16)	5.4668
del(9q)	6.77798
t(1;3)	6.54219
-5/7(q)	5.66479
-5/7(q)	6.51788
-5/7(q)	4.84946
-5/7(q)	6.01579
-5/7(q)	6.45701
-5/7(q)	7.25981
-5/7(q)	6.67449
-5/7(q)	6.19881
-5/7(q)	6.0102
-5/7(q)	5.03497
-5/7(q)	5.43445
-5/7(q)	5.6918
-5/7(q)	6.04142
-5/7(q)	7.00782
-5/7(q)	7.09857
-5/7(q)	6.41771
-5/7(q)	5.09687
-5/7(q)	5.03125
-5/7(q)	5.30901
-5/7(q)	6.86246
-5/7(q)	6.50121
-5/7(q)	6.52856
-5/7(q)	4.99974
-5/7(q)	6.83418
-5/7(q)	6.46727
-5/7(q)	7.07296
-5/7(q)	6.97591
-5/7(q)	6.90466
-9q	5.77152
-9q	6.16811
-9q	5.68608
-9q	7.44289
-9q	7.04143
-9q	5.66666
8	4.73788
8	4.5383
8	6.2966
8	6.50478
8	7.03634
8	4.86133
8	5.68249
8	3.72485
8	5.48597
8	6.4054
8	5.80569
8	5.84444
8	5.65686
8	6.94437
8	5.09376
8	4.55243
8	6.14838
8	5.57486
8	4.84839
8	5.64046
t(9;22)	7.00461
t(9;22)	6.35738
abn(3q)	6.37119
abn(3q)	5.11794

## Sheet: TSC22D2 expression in BloodPool
TSC22D2 (log2)	204094_s_at
HSC	8.33177
HSC	8.23154
HSC	8.47217
HSC	7.6933
HSC	8.10952
HSC	8.38767
Normal	8.91344
Normal	7.55461
Normal	8.25235
Normal	8.84186
Normal	8.54352
Normal	8.22441
Normal	7.25827
Normal	9.59457
Normal	7.75139
Normal	6.75928
Normal	9.12135
Normal	7.88956
Normal	9.12055
Normal	8.28612
Normal	8.69602
Normal	8.40987
Normal	8.05233
Normal	8.02641
Normal	8.07418
Normal	8.03979
Normal	9.31712
Normal	6.0106
Normal	8.06759
Normal	8.11007
Normal	8.67022
Normal	9.08588
Normal	8.74212
Normal	8.49925
Normal	7.5673
Normal	9.25815
Normal	7.88887
Normal	9.11743
Normal	7.57773
Normal	9.92929
Normal	7.95726
Normal	8.69001
Normal	9.76618
Normal	9.34069
Normal	8.65658
Normal	7.69662
Normal	8.18652
Normal	8.40221
Normal	8.72565
Normal	7.91181
Normal	8.16781
Normal	7.73511
Normal	7.70833
Normal	8.65019
Normal	7.5024
Normal	7.93701
Normal	9.47283
Normal	7.86557
Normal	7.76739
Normal	8.95635
Normal	8.60574
Normal	8.23744
Normal	7.9805
Normal	8.82025
Normal	9.27748
Normal	7.47301
Normal	8.37868
Normal	8.86773
Normal	8.1394
Normal	8.79919
Normal	7.93713
Normal	8.29091
Normal	8.58238
Normal	9.47243
Normal	8.66484
Normal	9.24567
Normal	8.84331
Normal	8.72233
Normal	8.8943
Normal	6.60601
Normal	8.34185
Normal	8.37813
Normal	8.08167
Normal	8.90026
Normal	8.25531
Normal	8.3862
Normal	8.33543
Normal	9.63012
Normal	8.99357
Normal	8.50926
Normal	8.21634
Normal	9.55504
Normal	9.02918
Normal	7.34395
Normal	8.21984
Normal	8.01816
Normal	8.68499
Normal	8.98989
Normal	8.66092
Normal	8.3608
Normal	8.56573
Normal	9.21169
Normal	7.35046
Normal	8.96937
Normal	9.09479
Normal	8.703
Normal	8.04025
Normal	8.20661
Normal	8.69053
Normal	8.66728
Normal	6.89072
Normal	8.46717
Normal	9.02204
Normal	7.1775
Normal	8.41665
Normal	7.48806
Normal	7.8468
Normal	8.51612
Normal	8.362
Normal	7.97572
Normal	8.84311
Normal	8.00298
Normal	8.99279
Normal	7.96072
Normal	8.06517
Normal	7.56972
Normal	8.88304
Normal	7.49736
Normal	7.4586
Normal	8.16519
Normal	6.32926
Normal	7.70296
Normal	7.72989
Normal	8.61817
Normal	7.80935
Normal	6.28744
Normal	7.75109
Normal	8.15785
Normal	8.2175
Normal	7.80841
Normal	7.9202
Normal	8.75113
Normal	9.18744
Normal	8.0753
Normal	9.14444
Normal	8.89787
Normal	6.77484
Normal	8.95145
Normal	7.33365
Normal	8.28912
Normal	8.2025
Normal	7.48726
Normal	7.87977
Normal	7.61472
Normal	8.19099
Normal	8.04777
Normal	8.13867
Normal	7.78606
Normal	7.70369
Normal	8.13587
Normal	8.07301
Normal	8.78674
Normal	8.16369
Normal	7.54425
Normal	8.89728
Normal	8.16464
Normal	8.69764
Normal	5.75846
Normal	8.74417
Normal	8.45138
Normal	8.02813
Normal	7.49323
Normal	8.2162
Normal	8.19239
Normal	7.56893
Normal	8.2832
Normal	7.99884
Normal	8.66148
Normal	8.78985
Normal	8.78363
Normal	9.1517
Normal	7.47131
Normal	9.69108
Normal	8.45461
Normal	8.84465
Normal	8.46153
Normal	7.9519
Normal	7.86036
Normal	7.70038
Normal	8.66025
Normal	8.52103
Normal	8.11941
Normal	7.89996
Normal	7.03675
Normal	8.02777
Normal	7.49604
Normal	8.55083
Normal	8.6194
Normal	8.9388
Normal	8.36463
Normal	7.87103
Normal	9.5973
Normal	8.24907
Normal	6.42273
Normal	8.30526
Normal	8.37748
Normal	8.13802
Normal	7.98678
Normal	8.20475
Normal	8.93974
Normal	9.1139
Normal	7.81655
Normal	9.09756
Normal	8.29846
Normal	8.81787
Normal	9.4232
Normal	7.99657
Normal	8.94696
Normal	9.09126
Normal	7.87846
Normal	8.76031
Normal	7.02101
Normal	7.37559
Normal	7.49277
Normal	7.9808
Normal	8.97695
Normal	7.95863
Normal	7.53165
Normal	9.32034
Normal	8.26234
Normal	9.12147
Normal	7.25687
Normal	8.71451
Normal	8.3626
Normal	9.09006
Normal	7.98949
Normal	7.09196
Normal	9.60375
Normal	8.2968
Normal	7.50341
Normal	8.08671
Normal	7.85533
Normal	8.11261
Normal	7.65702
Normal	7.481
Normal	7.82823
Normal	5.76487
Normal	8.17092
Normal	8.13702
Normal	8.71976
Normal	7.6221
Normal	8.30336
Normal	7.23872
Normal	8.53099
Normal	9.08231
Normal	7.93318
Normal	8.37434
Normal	7.74006
Normal	9.35659
Normal	8.16591
Normal	7.97498
Normal	7.97602
Normal	7.27839
Normal	6.90838
Normal	8.90621
Normal	8.30957
Normal	8.47384
Normal	8.52593
Normal	8.0045
Normal	8.83762
Normal	7.73628
Normal	7.58882
Normal	7.73567
Normal	8.2711
Normal	9.00009
Normal	7.23185
Normal	7.80255
Normal	9.51465
Normal	8.62012
Normal	5.50497
Normal	9.32089
Normal	9.13811
Normal	8.56567
Normal	8.15958
Normal	8.02135
Normal	7.93396
Normal	8.76961
Normal	8.41921
Normal	9.39027
Normal	9.43195
Normal	8.31489
Normal	7.38738
Normal	8.55237
Normal	8.33527
Normal	8.22572
Normal	8.3633
Normal	7.61007
Normal	8.19184
Normal	7.25985
Normal	9.18821
Normal	8.88667
Normal	8.27311
Normal	7.60561
Normal	8.24237
Normal	7.73968
Normal	8.4026
Normal	7.69338
Normal	7.4169
Normal	6.90646
Normal	7.73784
Normal	7.94625
Normal	7.43588
Normal	8.35471
Normal	9.03783
Normal	8.1572
Normal	8.06242
Normal	8.64444
Normal	9.12574
Normal	9.83819
Normal	7.99166
Normal	8.64393
Normal	8.32583
Normal	8.47313
Normal	8.04729
Normal	7.493
Normal	8.31048
Normal	8.00575
Normal	7.90836
Normal	8.82069
Normal	8.07185
Normal	8.51249
Normal	9.18434
Normal	9.18876
Normal	8.23482
Normal	9.54351
Normal	7.76129
Normal	8.54246
Normal	8.99705
Normal	8.085
Normal	9.45994
Normal	9.35227
Normal	8.50166
Normal	8.26904
Normal	8.34798
Normal	9.69594
Normal	9.89606
Normal	8.0029
Normal	8.41628
Normal	7.64575
Normal	9.49934
Normal	6.6128
Normal	8.1899
Normal	8.61186
Normal	7.24088
Normal	7.87951
Normal	8.46305
Normal	7.83139
Normal	8.12333
Normal	8.20254
Normal	8.78036
Normal	8.25349
Normal	8.66313
Normal	8.6642
Normal	8.74192
Normal	7.05294
Normal	8.0151
Normal	7.99389
Normal	9.25137
Normal	7.1273
Normal	7.75969
Normal	8.93691
Normal	8.24771
Normal	9.08205
Normal	9.32398
Normal	9.03456
Normal	8.70792
Normal	8.68096
Normal	8.88234
Normal	8.70267
Normal	9.16835
Normal	9.08959
Normal	8.96086
Normal	8.76651
Normal	7.72664
Normal	9.47072
Normal	8.95604
Normal	7.41426
Normal	6.70918
Normal	8.00894
Normal	9.85735
Normal	7.52356
Normal	7.53578
Normal	7.97029
Normal	8.25308
Normal	8.04878
Normal	8.06512
Normal	9.33633
Normal	8.71376
Normal	8.58593
Normal	9.80165
Normal	8.33109
Normal	8.99859
Normal	8.988
Normal	8.57254
Normal	8.37283
Normal	7.76284
Normal	8.74885
Normal	9.17911
Normal	9.33756
Normal	7.72056
Normal	7.61764
Normal	8.04074
Normal	8.95764
Normal	8.01784
Normal	7.99854
Normal	8.75224
Normal	7.50065
Normal	8.03058
Normal	7.06277
Normal	7.3592
Normal	7.24663
Normal	7.53127
Normal	7.87277
Normal	8.7341
Normal	8.59763
Normal	7.67877
Normal	8.41042
Normal	9.17223
Normal	8.40846
Normal	8.44452
Normal	8.85954
Normal	9.30462
Normal	8.35563
Normal	9.08312
Normal	8.47615
Normal	8.85739
Normal	8.61229
Normal	9.43195
Normal	8.19428
Normal	8.94672
Normal	9.3202
Normal	8.85724
Normal	9.73209
Normal	8.53839
Normal	8.7114
Normal	8.13605
Normal	8.13928
Normal	8.06294
Normal	7.96381
Normal	8.15864
Normal	7.99669
Normal	8.82842
Normal	8.99564
Normal	8.25063
Normal	7.03295
Normal	6.90803
Normal	8.4796
Normal	7.28739
Normal	9.18261
Normal	8.50065
Normal	7.509
Normal	7.31624
Normal	8.9337
Normal	8.37415
Normal	8.83195
Normal	8.31204
Normal	7.99895
Normal	8.61186
Normal	7.98778
Normal	8.62676
Normal	9.06287
Normal	8.96381
Normal	8.53183
Normal	9.13142
Normal	9.01302
Normal	9.01063
Normal	8.72512
Normal	9.13134
Normal	8.85511
Normal	8.12394
Normal	8.49873
Normal	7.91339
Normal	7.83913
Normal	7.29156
Normal	7.37626
Normal	7.04934
Normal	7.74627
Normal	6.82807
Normal	7.87329
Normal	8.52195
Normal	8.51029
Normal	8.79464
Normal	8.16462
Normal	7.33716
Normal	7.53333
Normal	8.27806
Normal	8.22788
Normal	9.59711
Normal	9.07883
Normal	8.46606
Normal	7.79756
Normal	7.23235
Normal	7.62875
Normal	7.204
Normal	7.47781
Normal	7.58424
Normal	7.80213
Normal	7.43221
Normal	7.55475
Normal	7.86971
Normal	8.39407
Normal	8.70253
Normal	9.00777
Normal	7.87281
Normal	9.38476
Normal	7.19343
Normal	7.78897
Normal	7.63235
Normal	8.72684
Normal	7.29342
Normal	9.03796
Normal	8.4642
Normal	8.17692
Normal	8.88472
Normal	7.90905
Normal	8.31602
Normal	9.36745
Normal	8.16758
Normal	7.61532
Normal	7.66939
Normal	7.06307
Normal	7.51067
Normal	7.95158
Normal	7.92104
Normal	7.28671
Normal	7.61463
Normal	7.90181
Normal	8.27444
Normal	8.71817
Normal	7.93356
Normal	8.13115
Normal	9.36053
Normal	7.48192
Normal	8.58901
Normal	8.32165
Normal	8.46535
Normal	9.27613
Normal	9.02443
Normal	7.73022
Normal	9.08218
Normal	7.83814
Normal	8.15774
Normal	9.9894
Normal	8.38764
Normal	7.95653
Normal	8.44259
Normal	7.90042
Normal	7.00774
Normal	7.4907
Normal	8.02678
Normal	7.73493
Normal	8.09689
Normal	8.27545
Normal	7.62186
Normal	8.46584
Normal	7.07316
Normal	6.94874
Normal	7.53014
Normal	7.94624
Normal	7.88856
Normal	8.28123
Normal	7.53537
Normal	8.4604
Normal	7.54403
Normal	8.79431
Normal	8.34071
Normal	9.16865
Normal	6.35401
Normal	8.16349
Normal	7.79092
Normal	7.45727
Normal	8.104
Normal	8.13877
Normal	7.90822
Normal	7.52043
Normal	8.46409
Normal	9.05509
Normal	9.1317
Normal	8.59944
Normal	9.6615
Normal	8.89168
Normal	8.03948
Normal	7.91991
Normal	7.59644
Normal	8.05796
Normal	8.58554
Normal	8.52936
Normal	8.07543
Normal	8.31576
Normal	8.50244
Normal	7.54954
Normal	8.22588
Normal	8.77238
Normal	8.18297
Normal	8.24376
Normal	7.94583
Normal	8.18998
Normal	8.68099
Normal	8.12925
Normal	8.66466
Normal	8.29502
Normal	7.89278
Normal	7.87298
Normal	8.44695
Normal	8.43927
Normal	8.79685
Normal	8.78528
Normal	8.45293
Normal	8.15087
Normal	8.20429
Normal	8.55006
Normal	8.53782
Normal	8.44091
Normal	8.81827
Normal	8.74501
Normal	8.52942
Normal	7.58083
Normal	8.08648
Normal	7.78892
Normal	8.32415
Normal	8.438
Normal	8.74606
Normal	8.88406
Normal	7.99976
Normal	8.32212
Normal	9.01697
Normal	8.27446
Normal	8.90936
Normal	8.51346
Normal	7.69303
Normal	8.39537
Normal	8.1779
Normal	8.41118
Normal	8.06401
Normal	8.72656
Normal	8.0052
Normal	8.25485
Normal	9.08253
Normal	7.83301
Normal	6.90051
Normal	8.90684
Normal	8.71803
Normal	8.20413
Normal	6.00993
Normal	8.65547
Normal	8.23455
Normal	8.43407
Normal	8.56968
Normal	8.38373
Normal	8.40906
Normal	7.96713
Normal	9.28344
Normal	7.48131
Normal	8.11181
Normal	8.57652
Normal	8.69126
Normal	8.27717
Normal	8.87553
Normal	7.75706
Normal	7.99135
Normal	8.71963
Normal	7.8287
Normal	8.32337
Normal	8.34857
Normal	8.19413
Normal	7.74777
Normal	8.15605
Normal	7.59243
Normal	8.06958
Normal	8.07188
Normal	7.74382
Normal	8.3599
Normal	8.48096
Normal	7.82459
Normal	8.35897
Normal	8.48365
Normal	7.5425
Normal	8.722
Normal	8.28292
Normal	7.88778
Normal	8.60683
Normal	7.855
Normal	8.3988
Normal	9.1777
Normal	8.01837
Normal	7.24224
Normal	8.24818
Normal	8.7807
Normal	8.21293
Normal	8.73381
Normal	4.14204
Normal	8.63787
Normal	8.26685
Normal	8.63664
Normal	8.29827
Normal	8.42144
Normal	7.8276
Normal	8.16538
Normal	7.83346
Normal	7.5043
Normal	7.9773
Normal	8.54159
Normal	7.92311
Normal	8.19748
Normal	7.72938
Normal	8.22199
Normal	7.05331
Normal	7.7563
Normal	8.69222
Normal	7.90478
Normal	8.11085
Normal	8.23857
Normal	6.88324
Normal	8.91599
Normal	6.8939
Normal	8.38829
Normal	9.11487
Normal	7.79707
Normal	7.69051
Normal	6.41443
Normal	7.93971
Normal	7.34394
Normal	7.49321
Normal	8.39248
Normal	8.29365
Normal	8.20503
Normal	8.59824
Normal	7.21814
Normal	8.00661
Normal	8.16124
Normal	7.50982
Normal	7.60117
Normal	7.1873
Normal	8.0762
Normal	7.89657
Normal	7.54073
Normal	7.66227
Normal	7.45062
Normal	7.27066
Normal	8.42001
Normal	7.66547
Normal	8.02539
Normal	7.96998
Normal	7.47336
Normal	8.82644
Normal	7.74656
Normal	8.19705
Normal	9.04184
Normal	9.03203
Normal	8.16217
Normal	8.1849
Normal	8.13999
Normal	8.36813
Normal	8.24186
Normal	7.61166
Normal	8.25742
Normal	8.18376
Normal	7.81653
Normal	9.32519
Normal	8.26461
Normal	8.69129
Normal	8.28684
Normal	8.84511
Normal	9.2209
Normal	8.8079
Normal	9.19251
Normal	9.26969
Normal	8.27863
Normal	9.19854
Normal	7.78834
Normal	8.61046
Normal	7.24447
Normal	8.14137
Normal	9.07869
Normal	8.9914
Normal	8.24628
Normal	9.20093
Normal	9.70341
Normal	9.42395
Normal	8.38518
Normal	7.94397
Normal	9.10641
Normal	9.35158
Normal	9.22535
Normal	8.70303
Normal	9.11141
Normal	8.78756
Normal	9.80851
Normal	9.92512
Normal	8.71937
Normal	9.41431
Normal	8.97674
Normal	9.21738
Normal	8.68751
Normal	8.5755
Normal	8.76641
Normal	8.07312
Normal	9.14183
Normal	8.73192
Normal	8.48837
Normal	8.25593
Normal	7.9545
Normal	6.87622
Normal	7.85224
Normal	7.88748
Normal	8.50464
Normal	7.581
Normal	9.38367
Normal	7.76612
Normal	8.61663
Normal	8.80623
Normal	8.39456
Normal	7.88609
Normal	8.03793
Normal	7.82828
Normal	7.49305
Normal	8.54113
Normal	9.18188
Normal	8.17687
Normal	8.5186
Normal	8.65709
Normal	8.555
Normal	8.28971
Normal	8.13825
Normal	8.63892
Normal	8.12225
Normal	8.73167
Normal	7.68713
Normal	8.41878
Normal	8.3382
Normal	8.19729
Normal	8.59211
Normal	8.62294
Normal	8.32379
Normal	9.0073
Normal	8.47455
Normal	8.04543
Normal	9.36365
Normal	7.13809
Normal	7.85173
Normal	7.5296
Normal	8.512
Normal	9.26876
Normal	8.34687
Normal	8.04373
Normal	9.67346
Normal	7.98746
Normal	8.95712
Normal	9.30658
Normal	9.17658
Normal	9.0439
Normal	7.63837
Normal	8.05149
Normal	8.48125
Normal	7.59854
Normal	8.90808
Normal	8.16499
Normal	8.12624
Normal	8.19707
Normal	8.3369
Normal	7.83558
Normal	8.82138
Normal	8.03971
Normal	9.18306
Normal	6.46131
Normal	7.46622
Normal	8.56558
Normal	9.35121
Normal	7.96539
Normal	7.47652
Normal	8.32039
Normal	7.37658
Normal	8.50427
Normal	8.95911
Normal	8.48577
Normal	7.72576
Normal	7.86614
Normal	9.2717
Normal	8.08758
Normal	7.90028
Normal	7.1929
Normal	6.71661
Normal	6.81033
Normal	7.05609
Normal	6.86124
Normal	7.85346
Normal	9.59564
Normal	8.47545
Normal	8.52873
Normal	9.05146
Normal	6.8743
Normal	8.60274
Normal	8.26096
Normal	8.83846
Normal	8.4371
Normal	7.3336
Normal	8.53847
Normal	7.14118
Normal	7.64744
Normal	9.15261
Normal	8.21705
Normal	9.04267
Normal	8.50109
Normal	7.69831
Normal	7.90091
Normal	8.23278
Normal	8.2233
Normal	8.13485
Normal	7.60764
Normal	7.56215
Normal	7.17963
Normal	7.75854
Normal	7.71414
Normal	8.42832
Normal	7.84448
Normal	8.74909
Normal	8.1321
Normal	7.21674
Normal	7.62029
Normal	8.16812
Normal	8.84224
Normal	8.93446
Normal	8.79886
Normal	8.7303
Normal	8.31506
Normal	8.87132
Normal	8.49163
Normal	8.73052
Normal	8.37636
Normal	7.96656
Normal	7.93947
Normal	7.26507
Normal	8.09379
Normal	8.24876
Normal	8.33814
Normal	8.54092
Normal	9.40757
Normal	9.17133
Normal	9.0508
Normal	8.77436
Normal	7.91
Normal	8.78228
Normal	9.25743
Normal	8.10659
Normal	8.66738
Normal	8.83467
Normal	8.54429
Normal	8.16972
Normal	8.65936
Normal	7.28115
Normal	8.6202
Normal	8.95301
Normal	8.12562
Normal	7.53343
Normal	7.52249
Normal	7.98591
Normal	9.49117
Normal	7.79008
Normal	7.80462
Normal	8.13834
Normal	8.46171
Normal	9.31751
Normal	6.57557
Normal	8.9641
Normal	9.27791
Normal	8.52296
Normal	8.51751
Normal	8.65466
Normal	8.65527
Normal	8.8971
Normal	8.15484
Normal	7.50555
Normal	9.54776
Normal	8.86144
Normal	7.828
Normal	8.72134
Normal	7.47015
Normal	7.83091
Normal	9.30414
Normal	7.35343
Normal	8.73757
Normal	7.34433
Normal	8.50497
Normal	8.63416
Normal	8.44922
Complex	8.13421
Complex	8.08195
Complex	7.2294
Complex	9.15739
Complex	8.28825
Complex	8.51477
Complex	8.01383
Complex	8.49911
Complex	8.68765
Complex	7.70397
Complex	9.01173
Complex	7.39492
Complex	8.66406
Complex	8.43829
Complex	8.77024
Complex	7.93173
Complex	8.27511
Complex	8.18559
Complex	8.3807
Complex	7.60245
Complex	8.99771
Complex	8.90659
Complex	8.39329
Complex	9.07169
Complex	8.18693
Complex	8.30328
Complex	8.12695
Complex	8.0908
Complex	8.50017
Complex	9.6686
Complex	8.545
Complex	7.64869
Complex	9.66643
Complex	7.97654
Complex	8.949
Complex	7.18059
Complex	8.67789
Complex	8.27262
Complex	8.15543
Complex	8.75907
Complex	9.40073
Complex	7.76665
Complex	9.0149
Complex	8.55737
Complex	8.89124
Complex	9.27739
Complex	7.42256
Complex	8.23379
Complex	8.69907
Complex	8.14378
Complex	9.08935
Complex	7.64652
Complex	8.12664
Complex	8.0779
Complex	7.755
Complex	8.43735
Complex	7.88192
Complex	7.99014
Complex	7.72668
Complex	8.28333
Complex	7.85246
Complex	7.81539
Complex	8.75842
Complex	7.82905
Complex	8.44753
Complex	8.24565
Complex	8.73127
Complex	4.1395
Complex	9.08147
Complex	8.22618
Complex	8.71248
Complex	8.90023
Complex	7.82793
Complex	9.30486
Complex	6.42681
Complex	6.69312
Complex	8.63998
Complex	8.81367
Complex	7.69803
Complex	8.18843
Complex	8.21005
Complex	8.36355
Complex	8.08846
Complex	6.61685
Complex	9.43743
Complex	8.05703
Complex	9.21471
inv(16)	7.97486
inv(16)	8.32911
inv(16)	7.11389
inv(16)	7.4316
inv(16)	8.30942
inv(16)	8.16234
inv(16)	7.71649
inv(16)	7.79151
inv(16)	8.62594
inv(16)	7.05415
inv(16)	7.98736
inv(16)	7.90277
inv(16)	7.26162
inv(16)	7.76307
inv(16)	8.0264
inv(16)	7.94784
inv(16)	8.27861
inv(16)	8.12616
inv(16)	8.42512
inv(16)	7.61629
inv(16)	7.65972
inv(16)	8.15048
inv(16)	7.99316
inv(16)	7.01861
inv(16)	7.48898
inv(16)	7.90264
inv(16)	7.17385
inv(16)	7.74344
inv(16)	7.9057
inv(16)	8.61563
inv(16)	7.63276
inv(16)	8.30986
inv(16)	7.91472
inv(16)	8.42574
inv(16)	8.23987
inv(16)	8.29379
inv(16)	7.62972
inv(16)	7.80856
inv(16)	7.07164
inv(16)	8.39064
inv(16)	7.50209
inv(16)	7.74464
inv(16)	7.91345
inv(16)	7.04663
inv(16)	8.31765
inv(16)	8.17186
inv(16)	7.962
inv(16)	8.07058
inv(16)	7.26094
inv(16)	8.00265
inv(16)	7.61451
inv(16)	7.81723
inv(16)	7.15193
inv(16)	7.23865
inv(16)	7.68433
inv(16)	7.6667
inv(16)	8.15942
inv(16)	7.85997
inv(16)	7.76227
inv(16)	8.18189
inv(16)	7.48712
inv(16)	8.38696
inv(16)	8.11161
inv(16)	8.0914
inv(16)	9.03263
inv(16)	8.58179
inv(16)	9.01373
inv(16)	7.29487
inv(16)	8.86826
inv(16)	8.53716
inv(16)	7.54511
inv(16)	8.26249
inv(16)	8.49168
inv(16)	8.47869
inv(16)	7.77164
inv(16)	8.70065
inv(16)	8.23542
t(15;17)	8.15745
t(15;17)	8.34962
t(15;17)	8.64216
t(15;17)	8.07814
t(15;17)	8.42419
t(15;17)	7.73116
t(15;17)	7.43468
t(15;17)	8.31234
t(15;17)	7.93623
t(15;17)	7.9985
t(15;17)	8.96192
t(15;17)	8.26841
t(15;17)	7.361
t(15;17)	8.36701
t(15;17)	7.86723
t(15;17)	7.2354
t(15;17)	7.44558
t(15;17)	7.2917
t(15;17)	8.07348
t(15;17)	7.6188
t(15;17)	8.86494
t(15;17)	9.09928
t(15;17)	7.44143
t(15;17)	8.3324
t(15;17)	8.02903
t(15;17)	7.96033
t(15;17)	8.05355
t(15;17)	8.74453
t(15;17)	8.66609
t(15;17)	7.20899
t(15;17)	8.2514
t(15;17)	6.97827
t(15;17)	8.55386
t(15;17)	4.64585
t(15;17)	5.26107
t(15;17)	8.53021
t(15;17)	7.89608
t(15;17)	7.77002
t(15;17)	8.69055
t(15;17)	7.22264
t(15;17)	8.25008
t(15;17)	7.65596
t(15;17)	7.55192
t(15;17)	8.7471
t(15;17)	7.75725
t(15;17)	8.04641
t(15;17)	7.27028
t(15;17)	8.32631
t(15;17)	7.85564
t(15;17)	8.19342
t(15;17)	7.8615
t(15;17)	8.23395
t(15;17)	6.7987
t(15;17)	8.23751
t(15;17)	7.85493
t(15;17)	8.98317
t(15;17)	7.53745
t(15;17)	7.40971
t(15;17)	8.64393
t(15;17)	7.83515
t(15;17)	8.25719
t(15;17)	8.77928
t(15;17)	9.02137
t(15;17)	7.53122
t(15;17)	7.3065
t(15;17)	7.87417
t(15;17)	7.5682
t(15;17)	7.72161
t(15;17)	7.37316
t(15;17)	8.48301
t(15;17)	7.24691
t(15;17)	7.95005
t(15;17)	7.30303
t(15;17)	8.46693
t(15;17)	7.08812
t(15;17)	7.97324
t(15;17)	6.49544
t(15;17)	6.07969
t(15;17)	8.03796
t(15;17)	7.96014
t(15;17)	7.91795
t(15;17)	8.21779
t(15;17)	7.88864
t(15;17)	9.07816
t(15;17)	8.29875
t(15;17)	9.36027
t(15;17)	7.42098
t(8;21)	8.62326
t(8;21)	7.69751
t(8;21)	6.30395
t(8;21)	7.24871
t(8;21)	8.21134
t(8;21)	7.5985
t(8;21)	7.17738
t(8;21)	8.87127
t(8;21)	7.70584
t(8;21)	7.49983
t(8;21)	8.44831
t(8;21)	6.13859
t(8;21)	8.06969
t(8;21)	7.47024
t(8;21)	7.40117
t(8;21)	7.19301
t(8;21)	7.28702
t(8;21)	8.09505
t(8;21)	7.34833
t(8;21)	6.75646
t(8;21)	7.75041
t(8;21)	6.90593
t(8;21)	6.94391
t(8;21)	7.4568
t(8;21)	6.17549
t(8;21)	7.74557
t(8;21)	6.85583
t(8;21)	7.16174
t(8;21)	8.03988
t(8;21)	8.38595
t(8;21)	8.32928
t(8;21)	7.83955
t(8;21)	7.63598
t(8;21)	8.5891
t(8;21)	7.54098
t(8;21)	7.29499
t(8;21)	8.20001
t(8;21)	7.45353
t(8;21)	8.20448
t(8;21)	7.41535
t(8;21)	7.83039
t(8;21)	7.67261
t(8;21)	7.59611
t(8;21)	8.46507
t(8;21)	8.05096
t(8;21)	8.1917
t(8;21)	7.8768
t(8;21)	7.84785
t(8;21)	7.33263
t(8;21)	8.15654
t(8;21)	5.54845
t(8;21)	7.92779
t(8;21)	7.05142
t(8;21)	6.51118
t(8;21)	7.98491
t(8;21)	6.56525
t(8;21)	6.62605
t(8;21)	7.24457
t(8;21)	8.67581
t(8;21)	7.67024
t(8;21)	7.0411
t(8;21)	8.32226
t(8;21)	7.01244
t(8;21)	7.47522
t(8;21)	8.3592
t(8;21)	7.33965
t(8;21)	9.19336
t(8;21)	8.00344
t(8;21)	7.41093
t(8;21)	7.6559
t(8;21)	8.33159
t(8;21)	6.34072
t(8;21)	7.44532
t(8;21)	9.33545
t(8;21)	6.74309
t(8;21)	7.20665
t(8;21)	6.43727
t(8;21)	7.94497
t(8;21)	7.30925
t(8;21)	8.74047
t(8;21)	8.44224
t(8;21)	7.60906
t(8;21)	7.45457
t(8;21)	6.66212
t(8;21)	8.13022
t(8;21)	8.24148
t(8;21)	7.77023
t(8;21)	6.10531
t(8;21)	6.17458
t(8;21)	7.7684
t(8;21)	6.90484
t(8;21)	6.83517
t(8;21)	8.52496
t(8;21)	8.31272
t(8;21)	7.41625
t(8;21)	6.36625
t(8;21)	8.09606
t(8;21)	7.98278
t(11q23)/MLL	7.92008
t(11q23)/MLL	9.71623
t(11q23)/MLL	6.8966
t(11q23)/MLL	8.24547
t(11q23)/MLL	8.25597
t(11q23)/MLL	7.20106
t(11q23)/MLL	8.3396
t(11q23)/MLL	8.17664
t(11q23)/MLL	8.08696
t(11q23)/MLL	7.9756
t(11q23)/MLL	8.24666
t(11q23)/MLL	7.73323
t(11q23)/MLL	9.39571
t(11q23)/MLL	9.84591
t(11q23)/MLL	7.85013
t(11q23)/MLL	8.85631
t(11q23)/MLL	7.60291
t(11q23)/MLL	8.73556
t(11q23)/MLL	8.83625
t(11q23)/MLL	6.41101
t(11q23)/MLL	10.5505
t(11q23)/MLL	8.5761
t(11q23)/MLL	8.31636
t(11q23)/MLL	6.55174
t(11q23)/MLL	7.54242
t(11q23)/MLL	9.70126
t(11q23)/MLL	9.70705
t(11q23)/MLL	8.28952
t(11q23)/MLL	7.74284
t(11q23)/MLL	7.8882
t(11q23)/MLL	7.63713
t(11q23)/MLL	7.32016
t(11q23)/MLL	8.48758
t(11q23)/MLL	7.68046
t(11q23)/MLL	8.66265
t(11q23)/MLL	9.07717
t(11q23)/MLL	7.74052
t(11q23)/MLL	10.9175
t(11q23)/MLL	7.61688
t(11q23)/MLL	6.94063
t(11q23)/MLL	9.10809
t(11q23)/MLL	6.97641
t(11q23)/MLL	7.0974
t(11q23)/MLL	9.40218
t(11q23)/MLL	8.29343
t(11q23)/MLL	8.39538
t(11q23)/MLL	7.962
t(11q23)/MLL	8.96339
t(11q23)/MLL	9.30726
t(11q23)/MLL	8.75335
t(11q23)/MLL	7.29157
t(11q23)/MLL	7.94433
t(11q23)/MLL	8.14849
t(11q23)/MLL	8.64639
t(11q23)/MLL	7.9328
t(11q23)/MLL	8.83995
t(11q23)/MLL	7.19997
t(11q23)/MLL	8.82911
nan	8.01773
nan	7.98955
nan	7.71926
nan	8.72024
nan	8.59432
nan	7.98833
nan	8.83515
nan	8.65582
nan	8.33905
nan	7.80401
nan	8.8606
nan	8.75627
nan	8.3555
nan	8.93937
nan	8.31492
nan	8.0184
nan	7.61538
nan	7.52316
nan	8.45847
nan	8.55826
nan	8.52552
nan	8.8204
nan	8.71356
nan	7.9027
nan	8.11835
nan	8.09214
nan	7.51321
nan	6.60432
nan	7.80846
nan	8.74239
nan	7.99065
nan	9.05239
nan	8.89844
nan	8.85087
nan	9.25545
nan	8.21839
nan	8.50121
nan	8.70285
nan	8.19134
nan	7.61688
nan	8.42831
nan	9.16304
nan	9.19951
nan	9.26133
nan	8.35539
nan	7.93685
nan	7.84295
nan	8.28122
nan	8.82983
nan	8.44356
nan	9.50182
nan	9.7579
nan	8.29957
nan	7.08959
nan	7.81252
nan	7.09776
nan	7.37021
nan	7.36115
nan	7.08622
nan	7.84938
nan	8.03867
nan	8.10971
nan	8.69078
nan	8.09841
nan	7.71217
nan	7.15312
nan	8.25413
nan	8.88473
nan	8.71618
nan	8.42734
nan	8.44167
nan	8.57256
nan	7.8343
nan	8.56829
nan	6.6433
nan	8.28324
nan	9.39597
nan	9.74149
nan	8.54799
nan	8.44583
nan	7.75591
nan	8.96949
nan	8.07753
nan	7.33809
nan	8.04398
nan	8.99812
nan	8.77352
nan	8.29747
nan	8.66691
nan	8.80411
nan	8.11952
nan	10.2232
nan	8.64991
nan	8.19699
nan	8.26844
nan	8.87005
nan	8.36825
nan	8.41995
nan	7.86527
nan	7.60949
nan	8.67227
nan	8.52787
nan	9.36598
nan	8.08643
nan	7.7668
nan	6.55639
nan	8.23238
nan	6.8225
nan	8.72251
nan	9.13044
nan	8.35919
nan	8.08036
nan	8.08851
nan	8.28272
nan	8.00575
nan	7.99088
nan	8.08315
nan	8.4975
Trisomy 8	7.79583
Trisomy 8	7.91932
Trisomy 8	8.73447
Trisomy 8	8.33796
Trisomy 8	7.65472
Trisomy 8	8.08139
Trisomy 8	8.1092
Trisomy 8	8.38773
Trisomy 8	7.7863
Trisomy 8	7.57127
Trisomy 8	8.75076
Trisomy 8	8.02144
Trisomy 8	7.88376
Trisomy 8	8.78972
Trisomy 8	7.86035
Trisomy 8	8.80946
Trisomy 8	4.1708
Trisomy 8	8.74378
Trisomy 8	8.93153
Trisomy 8	7.86222
Trisomy 8	8.11416
Trisomy 8	8.33835
Trisomy 8	7.28489
Trisomy 8	7.99325
Trisomy 8	7.06694
Trisomy 8	7.90148
Trisomy 8	7.17616
Trisomy 8	8.10002
Trisomy 8	7.57419
Trisomy 8	6.22074
Trisomy 8	8.34708
Trisomy 8	8.14702
del(5q)	6.91306
del(5q)	8.13378
del(5q)	7.76214
del(5q)	8.44449
del(5q)	7.88907
del(5q)	7.99728
del(5q)	8.29047
del(5q)	7.82253
del(5q)	7.83619
del(5q)	8.45467
del(5q)	9.12986
del(5q)	9.08861
del(5q)	8.64248
del(5q)	8.23332
del(5q)	8.90737
del(5q)	7.72434
del(5q)	8.31385
del(5q)	8.02372
del(5q)	8.23285
del(5q)	7.87344
del(5q)	8.70584
del(7q)/7q-	8.33721
del(7q)/7q-	8.76531
del(7q)/7q-	8.1937
del(7q)/7q-	8.48337
del(7q)/7q-	7.75995
del(7q)/7q-	8.48606
del(7q)/7q-	8.44229
del(7q)/7q-	7.88687
del(7q)/7q-	8.28828
del(7q)/7q-	8.60924
del(7q)/7q-	7.82034
del(7q)/7q-	9.18011
del(7q)/7q-	8.73622
del(7q)/7q-	4.14444
del(7q)/7q-	9.12766
del(7q)/7q-	8.64028
del(7q)/7q-	8.71743
del(7q)/7q-	8.90517
del(7q)/7q-	8.42384
del(7q)/7q-	7.83586
t(9;11)	9.13342
t(9;11)	8.59236
Other	7.06608
Other	8.09024
Other	8.76335
Other	7.88227
Other	9.14098
Other	8.46242
Other	7.9608
Other	8.46444
Other	7.73213
Other	7.56923
Other	7.79713
Other	8.04541
Other	8.81555
Other	8.5097
Other	7.36724
Other	8.52031
Other	8.46821
Other	9.15374
Other	8.80516
Other	9.1896
Other	8.48448
Other	8.06024
Other	8.72925
Other	9.3659
Other	7.37721
Other	7.2775
Other	9.13963
Other	8.86106
Other	6.71768
Other	9.03284
Other	9.036
Other	8.13384
Other	8.54436
Other	7.53744
Other	8.70095
Other	8.22182
Other	8.65432
Other	9.42654
Other	8.54212
Other	8.2067
Other	7.27139
Other	9.44396
Other	9.30649
Other	8.83932
Other	7.17792
Other	7.97841
Other	8.20313
Other	7.90147
Other	8.42474
Other	7.89933
Other	7.91453
Other	8.1512
Other	7.4839
Other	7.85841
Other	7.0754
Other	7.71455
Other	8.27207
Other	8.30016
Other	8.0781
Other	7.16364
Other	7.01996
Other	8.02585
Other	7.41931
Other	8.52778
Other	7.14732
Other	8.50784
Other	7.42144
Other	8.02507
Other	8.99277
Other	9.08903
Other	8.98873
Other	8.07914
Other	8.00812
Other	7.03078
Other	7.37377
Other	7.47035
Other	8.23988
Other	9.50717
Other	7.60473
Other	9.02595
Other	8.76553
Other	9.63015
Other	8.44379
Other	7.89109
Other	8.9468
Other	8.41254
Other	8.51188
Other	8.31505
Other	9.01283
Other	8.98237
Other	8.30036
7	7.83533
7	5.62433
7	7.99928
7	8.53349
7	7.79347
7	7.93153
7	8.00378
7	9.62482
Complex_ del(5q)	8.02731
Complex_ del(5q)	7.80109
Complex_ del(5q)	7.39945
Complex_ del(5q)	8.65034
Complex_ del(5q)	7.93347
Complex_ del(5q)	8.47036
Complex_ del(5q)	8.09513
Complex_ del(5q)	8.19095
Complex_ del(5q)	7.21759
Complex_ del(5q)	7.45878
Complex_ del(5q)	7.92829
Complex_ del(5q)	6.69343
Complex_ del(5q)	7.50209
Complex_ del(5q)	8.32089
Complex_ del(5q)	7.60169
Complex_ del(5q)	7.62578
Complex_ del(5q)	8.05161
Complex_ del(5q)	7.81278
Complex_ del(5q)	9.40485
Complex_ del(5q)	6.87212
Complex_ del(5q)	7.92987
Complex_ del(5q)	8.27045
Complex_ del(5q)	8.43054
Complex_ del(5q)	9.25886
Complex_ del(5q)	8.01346
Complex_ del(5q)	8.82021
Complex_ del(5q)	7.97479
Complex_ del(5q)	7.76709
Complex_ del(5q)	8.14021
Complex_ del(5q)	8.39017
Complex_ del(5q)	8.60076
Complex_ del(5q)	8.17345
Complex_ del(5q)	8.45275
Complex_ del(5q)	8.69076
Complex_ del(5q)	7.45098
Complex_ del(5q)	8.86638
Complex_ del(5q)	8.57795
Complex_ del(5q)	8.33692
Complex_ del(5q)	8.23488
Complex_ del(5q)	7.87991
Complex_ untypical	8.26757
Complex_ untypical	7.11111
Complex_ untypical	6.82194
Complex_ untypical	8.55778
Complex_ untypical	7.10436
Complex_ untypical	6.84518
Complex_ untypical	9.05892
Complex_ untypical	8.13861
Complex_ untypical	8.36761
Complex_ untypical	7.94853
Complex_ untypical	7.7243
inv(3)	7.95899
inv(3)	9.24595
inv(3)	9.86956
trisomy 11	8.19501
trisomy 13	8.40541
trisomy 13	8.12812
trisomy 13	9.10135
trisomy 13	9.12384
trisomy 13	5.85659
trisomy 13	8.52099
trisomy 13	8.23612
trisomy 13	9.4487
trisomy 13	8.55716
trisomy 13	8.65474
t(6;9)	7.7347
t(6;9)	7.46973
t(6;9)	8.24748
t(6;9)	10.0263
t(6;9)	8.34709
t(6;9)	8.25875
t(6;9)	8.47867
t(6;9)	7.73281
t(6;9)	8.30404
t(8;16)	7.87695
t(8;16)	6.58175
t(8;16)	6.89793
del(9q)	6.75522
t(1;3)	8.73861
-5/7(q)	8.85176
-5/7(q)	7.20782
-5/7(q)	7.54415
-5/7(q)	8.76251
-5/7(q)	9.13993
-5/7(q)	9.74504
-5/7(q)	8.63763
-5/7(q)	8.88247
-5/7(q)	8.06208
-5/7(q)	9.34277
-5/7(q)	6.29983
-5/7(q)	9.26839
-5/7(q)	7.99626
-5/7(q)	7.26586
-5/7(q)	9.19711
-5/7(q)	7.20566
-5/7(q)	8.61814
-5/7(q)	7.80564
-5/7(q)	8.42937
-5/7(q)	8.20415
-5/7(q)	9.04929
-5/7(q)	8.94946
-5/7(q)	7.57967
-5/7(q)	8.89221
-5/7(q)	8.03669
-5/7(q)	9.33837
-5/7(q)	7.06138
-5/7(q)	8.48126
-9q	6.79331
-9q	9.35665
-9q	7.75327
-9q	8.30535
-9q	8.92076
-9q	7.44119
8	9.08882
8	8.69737
8	9.26626
8	8.08893
8	8.38785
8	7.6312
8	8.34394
8	7.31488
8	8.65474
8	8.77
8	7.12516
8	8.45678
8	8.97925
8	7.41819
8	9.09146
8	6.72787
8	7.75923
8	6.37762
8	7.41567
8	8.23832
t(9;22)	8.45691
t(9;22)	8.38578
abn(3q)	8.41489
abn(3q)	8.42292

## Sheet: TSC22D3 expression in BloodPool
TSC22D3 (log2)	207001_x_at
HSC	5.75773
HSC	6.47152
HSC	6.67021
HSC	7.43326
HSC	6.5683
HSC	7.64505
Normal	9.6344
Normal	7.23172
Normal	6.43594
Normal	9.56499
Normal	8.58324
Normal	9.52868
Normal	7.44047
Normal	8.93125
Normal	9.28567
Normal	6.55468
Normal	8.37822
Normal	8.75986
Normal	7.70591
Normal	8.74844
Normal	8.76728
Normal	8.22108
Normal	6.90651
Normal	6.64759
Normal	7.90296
Normal	8.07575
Normal	7.57693
Normal	6.97382
Normal	7.13067
Normal	8.78387
Normal	8.95937
Normal	10.4843
Normal	8.84344
Normal	9.70777
Normal	6.59478
Normal	8.10942
Normal	8.33402
Normal	9.07872
Normal	7.05226
Normal	8.85686
Normal	7.94931
Normal	8.56778
Normal	9.01687
Normal	6.58191
Normal	7.57267
Normal	9.21749
Normal	10.1789
Normal	8.59816
Normal	8.41608
Normal	7.47675
Normal	7.54371
Normal	7.88514
Normal	7.71369
Normal	9.15473
Normal	9.63911
Normal	7.00559
Normal	9.10375
Normal	8.05131
Normal	7.5661
Normal	8.80805
Normal	9.0028
Normal	6.85436
Normal	9.91165
Normal	9.23172
Normal	9.96899
Normal	8.5175
Normal	7.80222
Normal	8.57699
Normal	10.3299
Normal	7.49754
Normal	7.52791
Normal	8.40248
Normal	7.69042
Normal	8.79947
Normal	10.1932
Normal	6.59934
Normal	6.77849
Normal	7.91515
Normal	9.70113
Normal	7.3956
Normal	9.01301
Normal	9.25741
Normal	8.50343
Normal	8.25229
Normal	6.6969
Normal	8.72196
Normal	9.01466
Normal	8.31945
Normal	9.56116
Normal	10.0373
Normal	8.84151
Normal	8.95176
Normal	9.26503
Normal	8.6076
Normal	7.79019
Normal	6.57395
Normal	7.84115
Normal	7.42261
Normal	8.48417
Normal	8.04645
Normal	7.92283
Normal	8.13491
Normal	8.635
Normal	8.84849
Normal	9.69887
Normal	10.9147
Normal	8.19142
Normal	9.36308
Normal	10.4659
Normal	9.27513
Normal	10.6521
Normal	8.89482
Normal	10.2342
Normal	6.67868
Normal	9.00091
Normal	10.7607
Normal	7.87228
Normal	9.04168
Normal	8.50234
Normal	9.30069
Normal	8.25877
Normal	8.80125
Normal	8.25466
Normal	6.9764
Normal	7.21492
Normal	8.6496
Normal	9.64326
Normal	8.31484
Normal	7.47146
Normal	6.73017
Normal	6.63617
Normal	7.10317
Normal	9.46844
Normal	7.38362
Normal	9.48302
Normal	7.12834
Normal	9.29244
Normal	9.3283
Normal	8.12559
Normal	7.71049
Normal	7.14779
Normal	9.59837
Normal	9.00406
Normal	9.51582
Normal	9.48184
Normal	8.20456
Normal	7.60928
Normal	8.66301
Normal	6.9093
Normal	8.79956
Normal	8.85191
Normal	7.84545
Normal	8.94703
Normal	8.43314
Normal	9.00953
Normal	9.58622
Normal	8.75288
Normal	8.37643
Normal	8.2802
Normal	8.31544
Normal	8.73947
Normal	7.1278
Normal	8.79535
Normal	6.78571
Normal	9.7265
Normal	6.67399
Normal	9.77071
Normal	6.99949
Normal	9.75855
Normal	6.21706
Normal	7.10223
Normal	6.94169
Normal	7.46742
Normal	8.14605
Normal	6.86472
Normal	8.22929
Normal	8.58783
Normal	9.39215
Normal	8.37939
Normal	9.29268
Normal	11.1582
Normal	7.08827
Normal	7.12452
Normal	9.14849
Normal	9.50615
Normal	8.93291
Normal	7.78354
Normal	9.58039
Normal	7.35308
Normal	8.53529
Normal	7.64436
Normal	8.56328
Normal	9.37202
Normal	7.20788
Normal	8.05615
Normal	7.58364
Normal	7.41193
Normal	9.49317
Normal	8.34646
Normal	8.36825
Normal	8.29454
Normal	7.44778
Normal	9.08725
Normal	7.35538
Normal	7.32959
Normal	8.792
Normal	8.83248
Normal	8.03109
Normal	8.95146
Normal	10.197
Normal	7.95726
Normal	10.0638
Normal	8.26714
Normal	8.54815
Normal	8.61123
Normal	7.80059
Normal	6.55589
Normal	10.1411
Normal	8.62731
Normal	7.98589
Normal	10.1588
Normal	8.71933
Normal	6.59455
Normal	9.23067
Normal	8.10751
Normal	9.18092
Normal	9.81175
Normal	6.49778
Normal	7.28848
Normal	9.5207
Normal	9.18498
Normal	8.67427
Normal	7.67645
Normal	10.5381
Normal	10.033
Normal	8.42558
Normal	10.0277
Normal	10.534
Normal	8.665
Normal	7.16746
Normal	10.8347
Normal	8.14248
Normal	7.08544
Normal	10.5572
Normal	7.66205
Normal	7.15253
Normal	6.72708
Normal	9.51771
Normal	9.91343
Normal	9.82442
Normal	7.17681
Normal	7.67912
Normal	8.49921
Normal	10.2749
Normal	7.92285
Normal	7.88467
Normal	7.98916
Normal	7.03651
Normal	8.28265
Normal	10.8329
Normal	9.96961
Normal	7.33778
Normal	10.4526
Normal	7.36405
Normal	8.72671
Normal	9.1756
Normal	9.56533
Normal	9.40178
Normal	7.08374
Normal	9.02996
Normal	8.42901
Normal	8.26014
Normal	8.99672
Normal	8.63083
Normal	8.66272
Normal	8.15736
Normal	7.21965
Normal	9.23303
Normal	7.40854
Normal	8.16608
Normal	7.49563
Normal	9.21512
Normal	8.23327
Normal	9.4881
Normal	6.65123
Normal	7.30422
Normal	10.245
Normal	6.97631
Normal	7.04698
Normal	9.30247
Normal	9.44048
Normal	6.89071
Normal	8.65174
Normal	8.10967
Normal	6.85296
Normal	8.49964
Normal	7.03307
Normal	6.34174
Normal	8.72676
Normal	6.50279
Normal	9.96743
Normal	9.51227
Normal	7.12482
Normal	9.28801
Normal	9.06721
Normal	11.0936
Normal	7.08824
Normal	6.72393
Normal	9.27477
Normal	7.36243
Normal	7.60154
Normal	7.36216
Normal	9.59419
Normal	10.7038
Normal	8.25771
Normal	7.50215
Normal	8.94579
Normal	8.30179
Normal	7.16544
Normal	6.35534
Normal	10.709
Normal	9.28173
Normal	7.65908
Normal	9.22095
Normal	9.76475
Normal	8.01049
Normal	7.41436
Normal	8.26362
Normal	9.87409
Normal	9.18772
Normal	8.57974
Normal	7.64132
Normal	7.19915
Normal	9.29702
Normal	9.31895
Normal	8.06875
Normal	9.92606
Normal	6.54557
Normal	7.92189
Normal	8.19506
Normal	9.97177
Normal	9.52424
Normal	8.45734
Normal	9.68277
Normal	9.00248
Normal	7.69713
Normal	8.012
Normal	8.24877
Normal	8.25476
Normal	7.71096
Normal	8.84934
Normal	8.10014
Normal	9.19431
Normal	8.13277
Normal	8.05713
Normal	10.9073
Normal	8.96596
Normal	9.19615
Normal	7.37579
Normal	6.99558
Normal	6.68164
Normal	8.45358
Normal	8.24237
Normal	8.41493
Normal	7.76125
Normal	8.21679
Normal	9.39392
Normal	7.49063
Normal	7.01411
Normal	7.97847
Normal	7.83381
Normal	8.31506
Normal	6.83326
Normal	8.62557
Normal	8.23073
Normal	8.21467
Normal	9.13071
Normal	7.73639
Normal	8.42701
Normal	8.72817
Normal	9.41494
Normal	8.73411
Normal	7.42447
Normal	8.91777
Normal	8.3366
Normal	8.80438
Normal	8.58598
Normal	8.64921
Normal	8.43686
Normal	8.16734
Normal	9.36241
Normal	6.9145
Normal	8.57401
Normal	8.42667
Normal	8.01167
Normal	7.46583
Normal	8.49959
Normal	6.83091
Normal	6.92976
Normal	10.2189
Normal	8.97923
Normal	6.44434
Normal	6.87154
Normal	8.41502
Normal	8.04019
Normal	9.64365
Normal	8.40657
Normal	7.33274
Normal	9.75372
Normal	9.29838
Normal	8.32852
Normal	8.52653
Normal	7.40391
Normal	7.4686
Normal	10.0718
Normal	8.22211
Normal	9.76105
Normal	8.38797
Normal	7.94179
Normal	8.80662
Normal	8.10871
Normal	8.86465
Normal	9.72675
Normal	8.95506
Normal	10.218
Normal	8.51901
Normal	7.62707
Normal	7.36337
Normal	7.80439
Normal	8.73523
Normal	7.71216
Normal	7.50006
Normal	8.41252
Normal	9.92472
Normal	10.8417
Normal	6.73842
Normal	8.62483
Normal	8.39099
Normal	9.02596
Normal	8.40628
Normal	10.3906
Normal	6.97199
Normal	9.49303
Normal	8.57654
Normal	7.24382
Normal	8.63055
Normal	10.2003
Normal	8.02355
Normal	9.4558
Normal	9.15104
Normal	8.82452
Normal	7.62291
Normal	7.1438
Normal	8.42362
Normal	8.85521
Normal	8.67648
Normal	8.99712
Normal	7.93926
Normal	7.13587
Normal	8.60926
Normal	8.32957
Normal	9.23293
Normal	7.30872
Normal	7.26702
Normal	9.13791
Normal	7.6517
Normal	7.97096
Normal	8.6154
Normal	7.38291
Normal	7.23615
Normal	8.99845
Normal	8.31975
Normal	8.01371
Normal	7.63064
Normal	7.44586
Normal	8.00796
Normal	6.51071
Normal	9.17746
Normal	7.82224
Normal	8.39223
Normal	8.22941
Normal	7.28156
Normal	7.3045
Normal	7.43311
Normal	7.56049
Normal	7.27528
Normal	7.26975
Normal	7.4632
Normal	9.06033
Normal	7.47775
Normal	9.59686
Normal	9.94084
Normal	9.0327
Normal	8.57094
Normal	8.37107
Normal	8.55268
Normal	7.06028
Normal	9.97808
Normal	8.9707
Normal	8.37482
Normal	9.11163
Normal	7.94057
Normal	7.8573
Normal	8.86675
Normal	9.4718
Normal	9.13203
Normal	9.61323
Normal	8.92972
Normal	8.71235
Normal	8.31623
Normal	8.28359
Normal	9.9412
Normal	8.44674
Normal	7.9592
Normal	8.0225
Normal	8.02735
Normal	7.82292
Normal	10.8127
Normal	8.40622
Normal	8.89768
Normal	9.12538
Normal	8.8281
Normal	7.33944
Normal	8.86454
Normal	9.72682
Normal	7.68169
Normal	8.39995
Normal	8.1444
Normal	11.0256
Normal	8.14559
Normal	9.04795
Normal	8.65491
Normal	7.33959
Normal	7.61352
Normal	9.75497
Normal	8.4952
Normal	8.93799
Normal	6.95921
Normal	8.55346
Normal	7.33154
Normal	8.86392
Normal	7.78094
Normal	8.10933
Normal	7.45185
Normal	8.40006
Normal	7.72853
Normal	9.5726
Normal	9.02834
Normal	11.4846
Normal	8.5196
Normal	7.60115
Normal	8.97203
Normal	9.52046
Normal	11.2317
Normal	8.4726
Normal	10.9588
Normal	9.35533
Normal	9.07148
Normal	8.12128
Normal	7.76531
Normal	8.98306
Normal	9.47761
Normal	10.6017
Normal	8.14084
Normal	9.05131
Normal	7.96463
Normal	7.47768
Normal	7.30509
Normal	6.90751
Normal	7.63063
Normal	7.27854
Normal	10.0867
Normal	7.78056
Normal	7.90903
Normal	8.11896
Normal	7.99803
Normal	7.98848
Normal	8.77415
Normal	9.8161
Normal	9.16561
Normal	9.77097
Normal	8.34236
Normal	9.40183
Normal	7.84675
Normal	7.27251
Normal	9.718
Normal	7.73515
Normal	8.33915
Normal	8.22913
Normal	7.79293
Normal	6.74914
Normal	9.49962
Normal	7.74133
Normal	9.14613
Normal	10.2047
Normal	9.78622
Normal	6.91771
Normal	10.8266
Normal	8.44932
Normal	7.26857
Normal	7.94927
Normal	9.9442
Normal	9.37026
Normal	10.3428
Normal	9.29988
Normal	9.8652
Normal	6.9674
Normal	9.94273
Normal	8.53664
Normal	8.27688
Normal	8.93669
Normal	7.82882
Normal	7.60256
Normal	10.1681
Normal	8.94092
Normal	6.90736
Normal	7.12308
Normal	9.96957
Normal	7.70131
Normal	9.08226
Normal	8.84191
Normal	10.1777
Normal	9.07186
Normal	7.40941
Normal	8.37161
Normal	10.3135
Normal	10.673
Normal	9.42946
Normal	8.13922
Normal	7.26618
Normal	8.40773
Normal	8.70086
Normal	7.91679
Normal	8.91597
Normal	7.96396
Normal	8.926
Normal	7.34915
Normal	8.5791
Normal	8.64607
Normal	9.15854
Normal	8.45776
Normal	7.50685
Normal	7.68214
Normal	8.94699
Normal	8.14733
Normal	9.40573
Normal	7.49402
Normal	9.29457
Normal	8.92279
Normal	9.23685
Normal	7.77858
Normal	6.50698
Normal	7.79649
Normal	6.93556
Normal	8.19136
Normal	7.17375
Normal	8.04451
Normal	7.88285
Normal	6.81724
Normal	9.30049
Normal	8.97664
Normal	7.81208
Normal	8.87215
Normal	7.55901
Normal	8.11967
Normal	8.31397
Normal	6.65534
Normal	9.4621
Normal	7.85085
Normal	7.39561
Normal	8.51928
Normal	7.46931
Normal	7.9097
Normal	8.19265
Normal	8.43347
Normal	8.41486
Normal	10.2214
Normal	7.40893
Normal	8.20929
Normal	7.5218
Normal	7.64352
Normal	8.37862
Normal	8.15849
Normal	8.00864
Normal	9.38043
Normal	7.36756
Normal	9.61794
Normal	9.18727
Normal	7.69559
Normal	9.90461
Normal	8.11996
Normal	8.3072
Normal	7.01023
Normal	8.48846
Normal	8.66419
Normal	7.55224
Normal	8.50029
Normal	7.0772
Normal	7.76311
Normal	8.49291
Normal	6.17243
Normal	10.3078
Normal	8.85653
Normal	9.46275
Normal	7.07729
Normal	9.89091
Normal	7.92566
Normal	7.67576
Normal	8.44491
Normal	8.80751
Normal	8.88368
Normal	10.8526
Normal	8.39945
Normal	7.0793
Normal	7.58285
Normal	8.75245
Normal	8.65355
Normal	8.00342
Normal	10.3503
Normal	7.63166
Normal	7.84809
Normal	9.00658
Normal	10.525
Normal	9.43935
Normal	8.26867
Normal	9.32752
Normal	8.62365
Normal	10.9741
Normal	8.08245
Normal	8.2208
Normal	8.47313
Normal	7.36529
Normal	9.182
Normal	7.56257
Normal	8.70332
Normal	7.67527
Normal	9.92492
Normal	8.76312
Normal	6.85812
Normal	8.92353
Normal	7.33362
Normal	8.99937
Normal	8.2794
Normal	8.46174
Normal	8.60299
Normal	8.23312
Normal	7.74346
Normal	8.05387
Normal	8.49019
Normal	8.24372
Normal	8.00952
Normal	7.40523
Normal	10.6469
Normal	9.16686
Normal	7.35152
Normal	7.86613
Normal	6.50283
Normal	8.29213
Normal	7.11313
Normal	9.2347
Normal	9.39821
Normal	6.78466
Normal	8.22263
Normal	8.80242
Normal	8.21456
Normal	7.36528
Normal	8.00127
Normal	7.42524
Normal	6.44234
Normal	7.66651
Normal	9.0016
Normal	8.06931
Normal	7.15403
Normal	8.3178
Normal	5.68907
Normal	7.35049
Normal	6.71634
Normal	8.58371
Normal	7.08836
Normal	9.25366
Normal	7.53178
Normal	7.49765
Normal	8.18496
Normal	7.82389
Normal	6.52738
Normal	9.72737
Normal	8.19294
Normal	9.34526
Normal	8.01705
Normal	8.32807
Normal	8.31315
Normal	8.05752
Normal	7.41801
Normal	8.27076
Normal	7.8074
Normal	7.26216
Normal	8.09818
Normal	7.86991
Normal	8.93268
Normal	7.85161
Normal	9.88578
Normal	6.90629
Normal	9.39179
Normal	10.3708
Normal	7.67333
Normal	7.67779
Normal	9.02726
Normal	7.95932
Normal	8.84899
Normal	7.98408
Normal	7.73377
Normal	9.11499
Normal	8.52068
Normal	8.19282
Normal	7.66049
Normal	8.1187
Normal	10.0198
Normal	10.5752
Normal	7.93627
Normal	6.97259
Normal	8.1659
Normal	7.67976
Normal	7.16056
Normal	7.43041
Normal	8.70296
Normal	7.99178
Normal	8.12444
Normal	8.69378
Normal	8.4228
Normal	9.32872
Normal	6.65496
Normal	9.58344
Normal	8.93703
Normal	6.68627
Normal	7.42874
Normal	10.2527
Normal	8.26343
Normal	8.49582
Normal	8.802
Normal	9.2424
Normal	9.53506
Normal	9.33084
Normal	8.17073
Normal	8.38446
Normal	10.4473
Normal	8.36129
Normal	7.95037
Normal	8.32667
Normal	7.59196
Normal	9.50601
Normal	7.6634
Normal	7.51492
Normal	8.38922
Normal	8.41764
Normal	9.33709
Normal	8.84891
Normal	7.34655
Normal	9.17077
Normal	10.0733
Normal	10.2216
Normal	7.41285
Normal	9.50266
Normal	8.15944
Normal	9.03158
Normal	9.52441
Normal	7.90296
Normal	8.21751
Normal	7.5592
Normal	8.66676
Normal	7.2374
Normal	7.48266
Normal	8.11893
Normal	7.64535
Normal	8.52623
Normal	8.22397
Normal	9.90657
Normal	9.72296
Normal	7.65629
Normal	7.20034
Normal	6.79062
Normal	6.96591
Normal	8.30664
Normal	8.29136
Normal	8.49125
Normal	8.54386
Normal	7.98795
Normal	8.46361
Normal	8.48391
Normal	8.73643
Normal	8.53838
Normal	7.75098
Normal	9.7671
Normal	9.63014
Normal	9.96532
Normal	8.28978
Normal	7.39192
Normal	10.0856
Normal	8.34113
Normal	7.94316
Normal	8.48863
Normal	7.53171
Normal	7.46774
Normal	8.67909
Normal	8.55553
Normal	8.76188
Normal	6.93172
Normal	8.92325
Normal	7.93109
Normal	8.42552
Normal	8.90984
Normal	8.20214
Normal	8.01206
Normal	7.09898
Normal	7.97893
Normal	7.48519
Normal	9.51513
Normal	9.2039
Normal	8.02614
Normal	8.71355
Normal	8.83003
Normal	6.45153
Normal	8.37755
Normal	8.74587
Normal	8.89434
Normal	7.62903
Normal	6.97949
Normal	8.79596
Normal	8.13182
Normal	9.13005
Normal	8.73455
Normal	8.98375
Normal	8.948
Normal	9.83316
Normal	7.50007
Normal	8.02201
Normal	7.71909
Normal	8.27601
Normal	9.10345
Normal	9.03041
Normal	6.68454
Normal	7.05469
Normal	8.62059
Normal	8.5775
Normal	8.5814
Normal	8.44472
Normal	8.16735
Normal	6.90792
Normal	8.49615
Normal	9.44857
Normal	7.08612
Normal	7.91244
Normal	8.30229
Normal	8.8739
Normal	7.11787
Normal	7.99357
Normal	8.5509
Normal	9.49185
Normal	8.43085
Normal	7.93533
Normal	7.29321
Normal	9.5326
Normal	9.73465
Normal	8.83245
Normal	7.14329
Normal	6.25481
Normal	8.88579
Normal	9.24159
Normal	8.85684
Normal	7.4213
Normal	7.96258
Normal	8.67338
Normal	7.71347
Normal	6.05745
Normal	10.7304
Normal	8.15855
Normal	8.14844
Normal	9.48047
Normal	8.47194
Normal	8.37721
Normal	7.72448
Normal	9.58187
Normal	8.94482
Normal	12.1896
Normal	9.9311
Normal	8.7149
Normal	8.76881
Normal	7.19547
Normal	9.08992
Normal	10.3814
Normal	7.97559
Normal	8.34477
Normal	8.4872
Normal	8.12093
Normal	8.32245
Normal	7.56093
Complex	9.61658
Complex	7.16887
Complex	8.42892
Complex	9.27237
Complex	8.71344
Complex	8.74461
Complex	8.38732
Complex	9.2685
Complex	8.82349
Complex	7.04128
Complex	9.61367
Complex	8.03711
Complex	8.7961
Complex	9.13926
Complex	8.94614
Complex	6.85148
Complex	9.73759
Complex	8.19274
Complex	9.40159
Complex	7.26115
Complex	8.23273
Complex	7.93916
Complex	8.09645
Complex	7.90498
Complex	8.24208
Complex	9.64432
Complex	7.54962
Complex	7.03019
Complex	9.28695
Complex	8.11521
Complex	7.74046
Complex	7.9564
Complex	8.91617
Complex	9.21538
Complex	9.9073
Complex	9.15696
Complex	8.35162
Complex	8.8052
Complex	7.50951
Complex	9.05094
Complex	8.10655
Complex	8.88028
Complex	9.68394
Complex	10.2709
Complex	9.74051
Complex	8.39417
Complex	8.04076
Complex	7.64312
Complex	9.50392
Complex	9.37632
Complex	8.89263
Complex	8.00367
Complex	9.38131
Complex	9.99048
Complex	8.19329
Complex	8.73523
Complex	7.73637
Complex	7.36909
Complex	6.79371
Complex	7.47277
Complex	8.30875
Complex	9.81718
Complex	8.86848
Complex	7.61992
Complex	8.8631
Complex	8.50184
Complex	8.49446
Complex	6.17398
Complex	8.76477
Complex	8.18166
Complex	8.94708
Complex	8.75479
Complex	8.09535
Complex	7.22867
Complex	8.20786
Complex	8.14721
Complex	7.81134
Complex	7.86716
Complex	8.9028
Complex	7.93635
Complex	6.55865
Complex	8.73615
Complex	8.15067
Complex	6.22134
Complex	9.51909
Complex	7.90944
Complex	9.60043
inv(16)	8.58843
inv(16)	11.1895
inv(16)	9.03294
inv(16)	8.89693
inv(16)	10.1818
inv(16)	7.87076
inv(16)	9.56328
inv(16)	6.95272
inv(16)	9.84783
inv(16)	9.09798
inv(16)	8.51611
inv(16)	7.44422
inv(16)	8.14343
inv(16)	10.0122
inv(16)	8.09732
inv(16)	8.50376
inv(16)	8.86389
inv(16)	8.20328
inv(16)	8.31818
inv(16)	9.2627
inv(16)	9.96433
inv(16)	9.28818
inv(16)	8.23562
inv(16)	9.8779
inv(16)	8.86115
inv(16)	8.18377
inv(16)	9.09401
inv(16)	9.30436
inv(16)	8.58577
inv(16)	8.62416
inv(16)	8.4527
inv(16)	7.70504
inv(16)	9.91406
inv(16)	7.01968
inv(16)	7.77255
inv(16)	8.86597
inv(16)	9.02113
inv(16)	10.0209
inv(16)	8.62877
inv(16)	9.60835
inv(16)	9.15713
inv(16)	9.24027
inv(16)	7.11625
inv(16)	7.26604
inv(16)	6.93744
inv(16)	7.19701
inv(16)	8.35375
inv(16)	9.42851
inv(16)	7.11004
inv(16)	9.58824
inv(16)	8.00883
inv(16)	7.61584
inv(16)	9.69877
inv(16)	8.08439
inv(16)	8.43577
inv(16)	7.86619
inv(16)	8.90938
inv(16)	8.19334
inv(16)	7.75962
inv(16)	10.0322
inv(16)	9.8263
inv(16)	6.95672
inv(16)	8.83167
inv(16)	9.73709
inv(16)	10.0589
inv(16)	8.12216
inv(16)	8.6835
inv(16)	9.50541
inv(16)	8.50643
inv(16)	9.20439
inv(16)	8.35203
inv(16)	10.3088
inv(16)	9.54297
inv(16)	9.73629
inv(16)	8.96995
inv(16)	9.47604
inv(16)	9.16286
t(15;17)	8.65946
t(15;17)	9.30862
t(15;17)	8.31079
t(15;17)	6.87607
t(15;17)	8.86472
t(15;17)	7.26835
t(15;17)	7.52165
t(15;17)	7.75191
t(15;17)	7.50231
t(15;17)	6.51749
t(15;17)	6.69234
t(15;17)	7.88498
t(15;17)	8.10668
t(15;17)	7.04619
t(15;17)	7.33922
t(15;17)	8.10122
t(15;17)	6.9346
t(15;17)	7.96863
t(15;17)	7.58051
t(15;17)	6.78668
t(15;17)	7.00124
t(15;17)	7.50327
t(15;17)	9.13804
t(15;17)	9.29344
t(15;17)	8.03367
t(15;17)	6.55675
t(15;17)	7.21257
t(15;17)	7.57863
t(15;17)	9.91241
t(15;17)	7.02835
t(15;17)	7.92808
t(15;17)	7.50254
t(15;17)	9.22127
t(15;17)	6.33467
t(15;17)	10.348
t(15;17)	8.68078
t(15;17)	6.51093
t(15;17)	8.93891
t(15;17)	10.2157
t(15;17)	8.49804
t(15;17)	7.17912
t(15;17)	8.29889
t(15;17)	8.78035
t(15;17)	9.11201
t(15;17)	6.78036
t(15;17)	8.65239
t(15;17)	7.54044
t(15;17)	7.06549
t(15;17)	7.91385
t(15;17)	7.66395
t(15;17)	8.4331
t(15;17)	7.87804
t(15;17)	8.77417
t(15;17)	9.84035
t(15;17)	8.92303
t(15;17)	9.03933
t(15;17)	8.12579
t(15;17)	6.72477
t(15;17)	8.52294
t(15;17)	7.02015
t(15;17)	6.82897
t(15;17)	8.64519
t(15;17)	7.63012
t(15;17)	7.30015
t(15;17)	8.26207
t(15;17)	7.24346
t(15;17)	9.17991
t(15;17)	7.65032
t(15;17)	8.00469
t(15;17)	7.90906
t(15;17)	7.9999
t(15;17)	7.80555
t(15;17)	7.07391
t(15;17)	7.10054
t(15;17)	8.01402
t(15;17)	7.14357
t(15;17)	7.7676
t(15;17)	7.59018
t(15;17)	8.64239
t(15;17)	8.59999
t(15;17)	8.26232
t(15;17)	9.63186
t(15;17)	8.27774
t(15;17)	8.51458
t(15;17)	9.86661
t(15;17)	10.087
t(15;17)	6.18522
t(8;21)	9.38284
t(8;21)	7.91641
t(8;21)	10.139
t(8;21)	9.25177
t(8;21)	8.85982
t(8;21)	7.9502
t(8;21)	9.7639
t(8;21)	8.86369
t(8;21)	9.41922
t(8;21)	6.74131
t(8;21)	9.27339
t(8;21)	6.66658
t(8;21)	7.23691
t(8;21)	8.22864
t(8;21)	7.81251
t(8;21)	6.95607
t(8;21)	6.86171
t(8;21)	10.2581
t(8;21)	7.00496
t(8;21)	7.13107
t(8;21)	8.55766
t(8;21)	7.08979
t(8;21)	7.83482
t(8;21)	9.14276
t(8;21)	7.19858
t(8;21)	7.31884
t(8;21)	10.0025
t(8;21)	6.46482
t(8;21)	10.2856
t(8;21)	9.19231
t(8;21)	9.04569
t(8;21)	7.7414
t(8;21)	8.47809
t(8;21)	10.3134
t(8;21)	8.34697
t(8;21)	7.58454
t(8;21)	7.67944
t(8;21)	7.69705
t(8;21)	7.90665
t(8;21)	7.50032
t(8;21)	8.95196
t(8;21)	8.2612
t(8;21)	7.98796
t(8;21)	6.90598
t(8;21)	7.44254
t(8;21)	8.00648
t(8;21)	8.00757
t(8;21)	6.67132
t(8;21)	10.0762
t(8;21)	10.5282
t(8;21)	10.0729
t(8;21)	8.8245
t(8;21)	8.81595
t(8;21)	9.65055
t(8;21)	8.64487
t(8;21)	9.46323
t(8;21)	8.8834
t(8;21)	8.47224
t(8;21)	8.86136
t(8;21)	10.2549
t(8;21)	8.83464
t(8;21)	7.51933
t(8;21)	7.36682
t(8;21)	9.55716
t(8;21)	9.4078
t(8;21)	9.17856
t(8;21)	9.12881
t(8;21)	7.50343
t(8;21)	8.23264
t(8;21)	9.00745
t(8;21)	9.1207
t(8;21)	8.9267
t(8;21)	8.03867
t(8;21)	8.68628
t(8;21)	8.78269
t(8;21)	7.11542
t(8;21)	6.91805
t(8;21)	10.9102
t(8;21)	10.4627
t(8;21)	9.85045
t(8;21)	7.72633
t(8;21)	6.67785
t(8;21)	7.99375
t(8;21)	8.73268
t(8;21)	6.95027
t(8;21)	8.3799
t(8;21)	7.12494
t(8;21)	8.14545
t(8;21)	7.6956
t(8;21)	8.34707
t(8;21)	8.69432
t(8;21)	8.50036
t(8;21)	7.33322
t(8;21)	8.14053
t(8;21)	8.64091
t(8;21)	7.45196
t(8;21)	8.49237
t(8;21)	9.14752
t(11q23)/MLL	8.81839
t(11q23)/MLL	8.26299
t(11q23)/MLL	7.25856
t(11q23)/MLL	7.46639
t(11q23)/MLL	9.08479
t(11q23)/MLL	7.39236
t(11q23)/MLL	9.18071
t(11q23)/MLL	9.25791
t(11q23)/MLL	9.28407
t(11q23)/MLL	8.52132
t(11q23)/MLL	9.27434
t(11q23)/MLL	6.42054
t(11q23)/MLL	7.79336
t(11q23)/MLL	9.1371
t(11q23)/MLL	7.84748
t(11q23)/MLL	9.33752
t(11q23)/MLL	7.01871
t(11q23)/MLL	6.83612
t(11q23)/MLL	8.37178
t(11q23)/MLL	6.76717
t(11q23)/MLL	8.45576
t(11q23)/MLL	9.0657
t(11q23)/MLL	9.00476
t(11q23)/MLL	7.78601
t(11q23)/MLL	8.56217
t(11q23)/MLL	9.35509
t(11q23)/MLL	9.66839
t(11q23)/MLL	9.50611
t(11q23)/MLL	8.14797
t(11q23)/MLL	7.3901
t(11q23)/MLL	8.04064
t(11q23)/MLL	9.17519
t(11q23)/MLL	8.50974
t(11q23)/MLL	7.84183
t(11q23)/MLL	8.92773
t(11q23)/MLL	8.14896
t(11q23)/MLL	8.84086
t(11q23)/MLL	7.68031
t(11q23)/MLL	8.90936
t(11q23)/MLL	8.63299
t(11q23)/MLL	8.95299
t(11q23)/MLL	7.37559
t(11q23)/MLL	8.24712
t(11q23)/MLL	7.62865
t(11q23)/MLL	8.94102
t(11q23)/MLL	8.982
t(11q23)/MLL	8.61956
t(11q23)/MLL	7.68289
t(11q23)/MLL	9.50609
t(11q23)/MLL	9.37164
t(11q23)/MLL	7.20748
t(11q23)/MLL	9.18431
t(11q23)/MLL	10.2385
t(11q23)/MLL	9.10584
t(11q23)/MLL	8.8345
t(11q23)/MLL	10.7373
t(11q23)/MLL	7.26762
t(11q23)/MLL	8.54247
nan	11.0588
nan	8.5876
nan	9.1385
nan	8.35544
nan	8.11769
nan	7.40823
nan	9.21193
nan	8.20976
nan	8.84185
nan	8.7379
nan	8.12538
nan	7.58718
nan	7.60727
nan	9.29543
nan	10.789
nan	7.41612
nan	7.30641
nan	7.6107
nan	8.51318
nan	5.80234
nan	9.68342
nan	8.55663
nan	9.67244
nan	7.7305
nan	7.80982
nan	9.46279
nan	8.84907
nan	7.59728
nan	8.51033
nan	9.12648
nan	8.43013
nan	8.37917
nan	8.06756
nan	8.71916
nan	7.88451
nan	7.82529
nan	9.98143
nan	9.07536
nan	8.98559
nan	7.88242
nan	9.62621
nan	7.13054
nan	5.95109
nan	9.17083
nan	9.46562
nan	8.94733
nan	8.0925
nan	8.15517
nan	8.59353
nan	8.68668
nan	9.19318
nan	8.31706
nan	8.06687
nan	8.35514
nan	9.03243
nan	9.66957
nan	8.88568
nan	9.24133
nan	8.41575
nan	7.19366
nan	9.01672
nan	8.3573
nan	8.50066
nan	7.41741
nan	10.3931
nan	6.6347
nan	10.2734
nan	9.89135
nan	9.64249
nan	7.69693
nan	8.48249
nan	10.2928
nan	8.6069
nan	8.89359
nan	7.59705
nan	9.31483
nan	8.68185
nan	8.08571
nan	9.13579
nan	7.23037
nan	9.56142
nan	8.85405
nan	8.39526
nan	8.33848
nan	8.1569
nan	8.23479
nan	7.86837
nan	9.0665
nan	6.50798
nan	8.32567
nan	8.62327
nan	8.96066
nan	9.22832
nan	8.86918
nan	8.47087
nan	8.54517
nan	9.75005
nan	7.86048
nan	8.28208
nan	7.27252
nan	8.41681
nan	7.67608
nan	8.61404
nan	8.70003
nan	7.484
nan	6.65232
nan	10.3426
nan	9.87623
nan	10.1694
nan	9.09633
nan	8.82635
nan	8.97664
nan	7.58637
nan	6.4152
nan	8.03371
nan	9.48916
nan	9.03448
nan	8.61786
Trisomy 8	8.84002
Trisomy 8	9.53062
Trisomy 8	7.87391
Trisomy 8	7.72991
Trisomy 8	7.80262
Trisomy 8	7.04881
Trisomy 8	9.9906
Trisomy 8	9.3821
Trisomy 8	8.19341
Trisomy 8	9.61961
Trisomy 8	9.18893
Trisomy 8	7.3692
Trisomy 8	8.30887
Trisomy 8	8.8686
Trisomy 8	7.62004
Trisomy 8	7.07886
Trisomy 8	6.1741
Trisomy 8	8.9472
Trisomy 8	8.75491
Trisomy 8	8.44658
Trisomy 8	10.1851
Trisomy 8	7.87427
Trisomy 8	7.40153
Trisomy 8	7.39655
Trisomy 8	9.22516
Trisomy 8	8.8736
Trisomy 8	9.09776
Trisomy 8	9.46907
Trisomy 8	10.0528
Trisomy 8	8.87813
Trisomy 8	7.97859
Trisomy 8	8.73038
del(5q)	8.63361
del(5q)	9.37769
del(5q)	8.18967
del(5q)	8.7316
del(5q)	7.73275
del(5q)	7.36546
del(5q)	7.46915
del(5q)	9.81355
del(5q)	7.6163
del(5q)	8.85948
del(5q)	8.04513
del(5q)	8.76115
del(5q)	10.3057
del(5q)	8.17804
del(5q)	8.75117
del(5q)	8.0345
del(5q)	8.42104
del(5q)	9.01637
del(5q)	7.07755
del(5q)	7.06553
del(5q)	7.10958
del(7q)/7q-	8.97975
del(7q)/7q-	9.12769
del(7q)/7q-	9.41466
del(7q)/7q-	8.16171
del(7q)/7q-	8.19496
del(7q)/7q-	7.37077
del(7q)/7q-	8.73689
del(7q)/7q-	7.73804
del(7q)/7q-	7.47443
del(7q)/7q-	8.12318
del(7q)/7q-	9.81884
del(7q)/7q-	8.49168
del(7q)/7q-	8.49612
del(7q)/7q-	6.17565
del(7q)/7q-	8.05042
del(7q)/7q-	10.311
del(7q)/7q-	8.94875
del(7q)/7q-	8.75646
del(7q)/7q-	9.89413
del(7q)/7q-	8.44813
t(9;11)	8.50399
t(9;11)	9.47828
Other	9.16803
Other	8.55371
Other	6.74478
Other	8.09048
Other	10.5193
Other	9.29905
Other	8.94797
Other	8.31533
Other	8.22877
Other	10.3171
Other	9.27054
Other	8.33417
Other	8.00573
Other	8.19915
Other	10.0628
Other	8.11424
Other	8.73599
Other	8.44269
Other	8.21288
Other	8.67908
Other	7.55709
Other	7.00755
Other	9.73643
Other	8.85311
Other	8.7254
Other	7.38877
Other	7.78519
Other	7.56182
Other	6.98375
Other	7.97094
Other	8.96727
Other	7.40388
Other	8.18018
Other	7.50859
Other	7.99716
Other	9.11228
Other	8.15004
Other	8.97789
Other	6.98359
Other	8.67998
Other	7.07492
Other	10.3083
Other	9.54562
Other	10.0425
Other	6.46238
Other	8.65567
Other	9.42574
Other	9.21492
Other	9.88289
Other	8.12623
Other	7.91482
Other	7.55619
Other	8.33185
Other	8.04562
Other	9.89866
Other	8.14515
Other	8.3936
Other	6.91441
Other	7.51439
Other	7.75077
Other	9.71099
Other	8.15745
Other	8.73407
Other	7.88894
Other	8.62665
Other	8.15121
Other	7.04199
Other	7.8505
Other	7.89253
Other	7.64576
Other	8.76963
Other	8.69379
Other	8.91676
Other	10.2782
Other	8.8947
Other	9.54287
Other	8.2255
Other	7.76062
Other	6.32427
Other	8.23773
Other	7.60098
Other	6.58752
Other	7.81709
Other	8.02176
Other	8.70279
Other	8.83766
Other	5.85853
Other	9.79677
Other	7.25364
Other	8.08065
Other	8.22417
7	8.12167
7	8.25705
7	9.24536
7	9.96708
7	8.17295
7	7.6676
7	7.85749
7	8.48424
Complex_ del(5q)	8.95067
Complex_ del(5q)	8.27897
Complex_ del(5q)	7.66338
Complex_ del(5q)	8.90518
Complex_ del(5q)	9.04203
Complex_ del(5q)	9.69329
Complex_ del(5q)	10.0668
Complex_ del(5q)	8.46434
Complex_ del(5q)	8.48998
Complex_ del(5q)	6.50424
Complex_ del(5q)	8.64969
Complex_ del(5q)	8.04106
Complex_ del(5q)	9.3973
Complex_ del(5q)	8.66417
Complex_ del(5q)	7.71338
Complex_ del(5q)	7.61974
Complex_ del(5q)	8.33631
Complex_ del(5q)	7.02874
Complex_ del(5q)	6.72154
Complex_ del(5q)	6.22686
Complex_ del(5q)	7.43356
Complex_ del(5q)	6.86357
Complex_ del(5q)	7.18951
Complex_ del(5q)	7.79225
Complex_ del(5q)	8.94737
Complex_ del(5q)	7.86538
Complex_ del(5q)	7.48466
Complex_ del(5q)	8.14346
Complex_ del(5q)	8.2564
Complex_ del(5q)	8.50338
Complex_ del(5q)	7.50029
Complex_ del(5q)	7.67786
Complex_ del(5q)	8.37749
Complex_ del(5q)	7.51116
Complex_ del(5q)	7.82277
Complex_ del(5q)	8.48539
Complex_ del(5q)	7.64226
Complex_ del(5q)	7.4225
Complex_ del(5q)	6.99154
Complex_ del(5q)	8.34236
Complex_ untypical	10.2201
Complex_ untypical	7.73463
Complex_ untypical	9.35455
Complex_ untypical	9.33668
Complex_ untypical	6.91456
Complex_ untypical	10.8391
Complex_ untypical	7.24183
Complex_ untypical	7.78192
Complex_ untypical	8.8541
Complex_ untypical	8.37464
Complex_ untypical	7.15396
inv(3)	6.61056
inv(3)	8.17453
inv(3)	8.5099
trisomy 11	8.0203
trisomy 13	7.89177
trisomy 13	9.89946
trisomy 13	10.0733
trisomy 13	8.45933
trisomy 13	6.44363
trisomy 13	8.19937
trisomy 13	10.4784
trisomy 13	7.01008
trisomy 13	10.1618
trisomy 13	10.4087
t(6;9)	9.01063
t(6;9)	9.05168
t(6;9)	7.70956
t(6;9)	9.19263
t(6;9)	9.60818
t(6;9)	9.78435
t(6;9)	8.61861
t(6;9)	9.2945
t(6;9)	7.87752
t(8;16)	7.39274
t(8;16)	8.55769
t(8;16)	6.76786
del(9q)	7.96364
t(1;3)	7.67518
-5/7(q)	7.44624
-5/7(q)	7.9046
-5/7(q)	8.26991
-5/7(q)	8.13036
-5/7(q)	9.94717
-5/7(q)	9.78309
-5/7(q)	9.76725
-5/7(q)	8.63839
-5/7(q)	8.57172
-5/7(q)	9.18162
-5/7(q)	6.2404
-5/7(q)	8.27986
-5/7(q)	9.25503
-5/7(q)	9.51428
-5/7(q)	7.99742
-5/7(q)	7.53234
-5/7(q)	9.21992
-5/7(q)	10.2692
-5/7(q)	8.66394
-5/7(q)	10.1558
-5/7(q)	9.5523
-5/7(q)	10.071
-5/7(q)	8.30144
-5/7(q)	9.37058
-5/7(q)	7.70181
-5/7(q)	7.2533
-5/7(q)	5.80119
-5/7(q)	8.35953
-9q	8.13628
-9q	8.89334
-9q	8.11173
-9q	6.06194
-9q	9.61384
-9q	6.51799
8	7.29929
8	9.04178
8	9.3331
8	9.41018
8	7.48715
8	8.09068
8	9.18857
8	8.81232
8	8.45728
8	7.79719
8	7.16229
8	8.06376
8	8.67044
8	10.5432
8	9.38626
8	7.68517
8	7.36503
8	8.03975
8	6.07988
8	8.31585
t(9;22)	9.91196
t(9;22)	8.43298
abn(3q)	7.98267
abn(3q)	8.38229

## Sheet: TSC22D4 expression in BloodPool
TSC22D4 (log2)	1554501_at
HSC	4.28918
HSC	4.53115
HSC	4.84329
HSC	6.67985
HSC	4.68082
HSC	4.94854
Normal	4.64627
Normal	5.4533
Normal	5.5202
Normal	5.66932
Normal	6.04063
Normal	4.71387
Normal	5.7366
Normal	5.15847
Normal	5.53613
Normal	5.91378
Normal	6.10821
Normal	5.55991
Normal	6.40148
Normal	5.75621
Normal	5.36245
Normal	6.07473
Normal	4.87288
Normal	6.05839
Normal	5.1738
Normal	5.47891
Normal	6.77186
Normal	5.43946
Normal	5.86058
Normal	6.31743
Normal	4.9762
Normal	5.74747
Normal	5.47498
Normal	5.0532
Normal	5.16373
Normal	6.21218
Normal	6.13361
Normal	4.97189
Normal	5.59801
Normal	6.14687
Normal	5.81997
Normal	5.45957
Normal	6.32246
Normal	6.32632
Normal	5.77122
Normal	5.78268
Normal	5.65037
Normal	5.8564
Normal	5.4927
Normal	5.8158
Normal	5.54903
Normal	5.90728
Normal	5.63129
Normal	5.63318
Normal	5.14515
Normal	6.03141
Normal	5.67417
Normal	5.43732
Normal	5.80047
Normal	5.4946
Normal	5.5253
Normal	6.03023
Normal	5.0268
Normal	4.94494
Normal	5.61398
Normal	5.91362
Normal	6.36233
Normal	5.18916
Normal	4.32196
Normal	5.28456
Normal	6.16257
Normal	6.00722
Normal	6.25681
Normal	5.56921
Normal	4.70952
Normal	6.11433
Normal	7.5276
Normal	5.77058
Normal	5.59767
Normal	5.47464
Normal	5.43765
Normal	5.53119
Normal	7.37391
Normal	5.31141
Normal	5.78028
Normal	5.8987
Normal	4.78007
Normal	4.58899
Normal	6.31366
Normal	4.91382
Normal	5.64714
Normal	6.55202
Normal	5.3477
Normal	5.72347
Normal	6.04909
Normal	6.61914
Normal	6.52699
Normal	6.84864
Normal	5.38545
Normal	5.30362
Normal	6.01258
Normal	6.19241
Normal	5.8669
Normal	5.98722
Normal	7.61695
Normal	4.65922
Normal	5.72427
Normal	5.60187
Normal	4.92448
Normal	6.30663
Normal	4.51067
Normal	5.87902
Normal	4.88436
Normal	5.7211
Normal	4.89587
Normal	4.50258
Normal	4.98932
Normal	5.32649
Normal	5.22131
Normal	6.02702
Normal	5.48101
Normal	4.87906
Normal	7.0555
Normal	5.75844
Normal	5.4612
Normal	5.13025
Normal	5.79117
Normal	4.86109
Normal	6.49963
Normal	5.57531
Normal	5.04658
Normal	6.29645
Normal	5.07576
Normal	6.99973
Normal	5.11962
Normal	9.21565
Normal	5.54492
Normal	6.09457
Normal	4.75895
Normal	5.51898
Normal	6.90395
Normal	5.07979
Normal	6.787
Normal	6.04083
Normal	5.84493
Normal	4.93916
Normal	6.65384
Normal	5.0604
Normal	6.86195
Normal	5.22401
Normal	4.96538
Normal	6.11487
Normal	4.50733
Normal	5.83868
Normal	4.62152
Normal	5.9782
Normal	5.3997
Normal	5.32764
Normal	6.22312
Normal	6.55848
Normal	6.09398
Normal	6.21864
Normal	4.35286
Normal	5.51278
Normal	5.66669
Normal	5.3933
Normal	5.18112
Normal	4.58222
Normal	5.26528
Normal	7.2417
Normal	6.0255
Normal	5.21257
Normal	6.40394
Normal	4.63376
Normal	6.92462
Normal	5.68354
Normal	5.38671
Normal	4.97887
Normal	5.06627
Normal	4.99157
Normal	6.33508
Normal	6.64473
Normal	4.96905
Normal	5.19691
Normal	5.76793
Normal	5.47827
Normal	4.41052
Normal	4.88556
Normal	6.29433
Normal	5.24743
Normal	5.27508
Normal	5.59509
Normal	5.89329
Normal	6.91167
Normal	4.91814
Normal	5.06798
Normal	6.12361
Normal	4.88185
Normal	5.19195
Normal	5.47329
Normal	6.12908
Normal	4.74786
Normal	4.52927
Normal	5.61065
Normal	7.21611
Normal	5.72197
Normal	5.81128
Normal	5.69615
Normal	5.57538
Normal	4.58765
Normal	5.24137
Normal	5.74116
Normal	6.05056
Normal	4.66659
Normal	6.00883
Normal	5.4643
Normal	6.2015
Normal	4.7234
Normal	5.56594
Normal	5.46302
Normal	4.4513
Normal	4.83984
Normal	6.15436
Normal	4.46259
Normal	6.14149
Normal	5.75266
Normal	7.3648
Normal	5.63934
Normal	7.20094
Normal	5.21915
Normal	5.87578
Normal	5.72037
Normal	6.74964
Normal	5.00667
Normal	6.11186
Normal	5.50297
Normal	5.36268
Normal	4.95241
Normal	5.12931
Normal	5.51277
Normal	6.6051
Normal	5.88539
Normal	5.35441
Normal	4.88181
Normal	5.5391
Normal	4.68453
Normal	6.23451
Normal	5.8359
Normal	6.09561
Normal	5.10104
Normal	5.27306
Normal	5.04654
Normal	5.26129
Normal	6.11001
Normal	5.46111
Normal	5.48944
Normal	4.75436
Normal	5.45711
Normal	6.36342
Normal	5.15553
Normal	5.48322
Normal	5.5738
Normal	4.56941
Normal	5.38415
Normal	4.30089
Normal	5.4942
Normal	5.39689
Normal	4.30681
Normal	6.79395
Normal	5.93472
Normal	5.29404
Normal	5.09265
Normal	4.15573
Normal	5.35016
Normal	4.80182
Normal	4.94025
Normal	7.31294
Normal	4.8984
Normal	4.95009
Normal	5.74018
Normal	5.16593
Normal	5.60567
Normal	5.28207
Normal	6.1206
Normal	5.48709
Normal	6.67707
Normal	4.94295
Normal	6.92347
Normal	5.91471
Normal	5.0089
Normal	5.79413
Normal	6.21167
Normal	4.825
Normal	6.33933
Normal	5.62815
Normal	5.67256
Normal	4.51883
Normal	7.52723
Normal	5.23456
Normal	5.34438
Normal	5.2144
Normal	5.89778
Normal	6.37352
Normal	4.98945
Normal	5.42418
Normal	5.80109
Normal	5.06028
Normal	6.15155
Normal	5.12865
Normal	5.44744
Normal	6.22151
Normal	5.49319
Normal	5.11461
Normal	6.18719
Normal	6.29716
Normal	5.82008
Normal	4.88812
Normal	4.51113
Normal	5.25526
Normal	7.96516
Normal	6.57566
Normal	5.71732
Normal	5.98448
Normal	5.74218
Normal	6.33436
Normal	5.49189
Normal	5.93348
Normal	5.44831
Normal	6.23142
Normal	5.3679
Normal	5.2508
Normal	5.4265
Normal	6.10798
Normal	5.67793
Normal	7.79678
Normal	6.13055
Normal	5.48205
Normal	6.054
Normal	5.92295
Normal	5.43841
Normal	6.39028
Normal	5.15157
Normal	6.11616
Normal	4.92294
Normal	5.58131
Normal	5.76705
Normal	4.97062
Normal	6.85322
Normal	6.74569
Normal	7.78256
Normal	5.0304
Normal	5.7925
Normal	5.08299
Normal	5.10539
Normal	5.3512
Normal	5.19209
Normal	5.96295
Normal	7.41204
Normal	7.68067
Normal	6.05473
Normal	5.38184
Normal	4.99757
Normal	6.49354
Normal	5.11233
Normal	5.31312
Normal	5.2456
Normal	5.91388
Normal	7.08931
Normal	6.0801
Normal	4.83465
Normal	4.92935
Normal	5.74019
Normal	5.5019
Normal	6.4729
Normal	5.72423
Normal	5.08437
Normal	4.76613
Normal	4.94713
Normal	5.2187
Normal	5.97576
Normal	5.04668
Normal	5.5011
Normal	4.63549
Normal	4.28317
Normal	4.89075
Normal	7.28861
Normal	5.31572
Normal	4.89332
Normal	6.12934
Normal	5.58679
Normal	5.62832
Normal	6.58184
Normal	5.8473
Normal	6.32755
Normal	5.14848
Normal	6.85276
Normal	6.32263
Normal	5.99057
Normal	4.91048
Normal	4.8546
Normal	5.004
Normal	4.71392
Normal	4.74635
Normal	5.88956
Normal	6.07164
Normal	5.84414
Normal	6.02991
Normal	6.02373
Normal	5.56408
Normal	5.34948
Normal	5.61884
Normal	5.67532
Normal	5.69309
Normal	6.86275
Normal	5.33409
Normal	6.48635
Normal	5.37116
Normal	5.63775
Normal	5.49984
Normal	5.54711
Normal	5.86344
Normal	5.37589
Normal	5.32844
Normal	6.00074
Normal	4.80953
Normal	6.1633
Normal	4.4246
Normal	5.56778
Normal	5.71351
Normal	4.96067
Normal	6.1424
Normal	5.92387
Normal	5.50139
Normal	6.93403
Normal	5.56454
Normal	5.427
Normal	6.23486
Normal	6.70874
Normal	6.66099
Normal	6.33822
Normal	4.95654
Normal	6.96373
Normal	6.7806
Normal	6.40449
Normal	5.31929
Normal	6.14077
Normal	6.3577
Normal	6.61144
Normal	6.431
Normal	6.06854
Normal	5.51081
Normal	5.61007
Normal	5.68851
Normal	6.04541
Normal	5.04475
Normal	5.25174
Normal	6.12418
Normal	5.15694
Normal	5.64598
Normal	4.52889
Normal	5.73768
Normal	5.02265
Normal	6.30227
Normal	5.90903
Normal	4.83746
Normal	4.93686
Normal	5.19663
Normal	5.76445
Normal	5.26685
Normal	6.64377
Normal	6.38956
Normal	6.06689
Normal	5.60359
Normal	7.32513
Normal	6.27077
Normal	6.10832
Normal	7.96951
Normal	6.66146
Normal	6.12149
Normal	6.52539
Normal	5.07632
Normal	6.09274
Normal	6.78356
Normal	6.3701
Normal	6.39283
Normal	6.21074
Normal	6.32387
Normal	6.21921
Normal	5.77106
Normal	6.18314
Normal	6.50924
Normal	6.26635
Normal	4.6196
Normal	5.73754
Normal	6.1392
Normal	5.29364
Normal	6.82483
Normal	6.18153
Normal	6.07916
Normal	5.54693
Normal	5.81578
Normal	5.07779
Normal	4.91818
Normal	5.03971
Normal	5.14729
Normal	4.94323
Normal	4.48199
Normal	5.12383
Normal	4.62861
Normal	5.93799
Normal	5.03576
Normal	5.31093
Normal	4.52983
Normal	4.86145
Normal	5.88904
Normal	6.40553
Normal	5.38434
Normal	5.32987
Normal	6.33013
Normal	5.96296
Normal	4.93012
Normal	5.54327
Normal	6.5281
Normal	5.71232
Normal	5.04242
Normal	6.54763
Normal	4.75646
Normal	5.59792
Normal	5.16407
Normal	6.205
Normal	4.67742
Normal	5.49884
Normal	5.9092
Normal	5.18749
Normal	6.17195
Normal	5.37326
Normal	5.3859
Normal	5.71404
Normal	5.80648
Normal	5.06061
Normal	4.36335
Normal	4.1617
Normal	5.23648
Normal	5.41227
Normal	7.42652
Normal	5.41187
Normal	5.25247
Normal	5.31202
Normal	5.34478
Normal	4.98853
Normal	4.74319
Normal	5.26918
Normal	5.52929
Normal	6.3146
Normal	5.53323
Normal	5.88605
Normal	5.23845
Normal	6.09605
Normal	5.70944
Normal	5.90857
Normal	6.01425
Normal	5.14936
Normal	4.7557
Normal	6.12431
Normal	4.90736
Normal	5.05146
Normal	5.84394
Normal	6.58338
Normal	6.60131
Normal	5.09983
Normal	4.66105
Normal	5.63625
Normal	7.58042
Normal	6.04924
Normal	4.9351
Normal	5.29983
Normal	6.47165
Normal	5.38617
Normal	5.80988
Normal	5.47576
Normal	4.87871
Normal	5.22215
Normal	5.10391
Normal	5.03467
Normal	4.4773
Normal	4.51064
Normal	5.2147
Normal	4.96843
Normal	6.31435
Normal	5.37227
Normal	5.94991
Normal	5.8271
Normal	5.36569
Normal	5.77846
Normal	5.16103
Normal	5.68838
Normal	5.24849
Normal	6.08041
Normal	5.12169
Normal	5.58725
Normal	5.07767
Normal	4.82198
Normal	5.48505
Normal	5.70809
Normal	5.8959
Normal	5.56646
Normal	5.98851
Normal	6.33588
Normal	5.90257
Normal	5.08198
Normal	5.28808
Normal	6.56809
Normal	6.49224
Normal	5.72066
Normal	5.26567
Normal	5.51775
Normal	4.98899
Normal	6.32202
Normal	6.52898
Normal	5.45992
Normal	5.85421
Normal	5.48371
Normal	5.67552
Normal	5.78735
Normal	6.73173
Normal	6.5958
Normal	6.16601
Normal	5.58135
Normal	5.28364
Normal	6.3984
Normal	5.79418
Normal	6.09352
Normal	5.9543
Normal	6.2457
Normal	5.88812
Normal	6.15979
Normal	5.75272
Normal	6.07385
Normal	5.85887
Normal	6.6183
Normal	6.39536
Normal	5.44754
Normal	6.71031
Normal	5.62775
Normal	5.1097
Normal	6.10786
Normal	7.03897
Normal	6.48999
Normal	5.33665
Normal	4.77122
Normal	5.20121
Normal	6.44996
Normal	6.21899
Normal	6.86102
Normal	6.17281
Normal	5.87694
Normal	5.90846
Normal	5.01227
Normal	6.54855
Normal	5.78302
Normal	5.25013
Normal	6.0652
Normal	6.78969
Normal	5.46889
Normal	5.55113
Normal	6.27404
Normal	6.09475
Normal	5.86866
Normal	5.95646
Normal	6.13185
Normal	5.68588
Normal	5.27033
Normal	5.05735
Normal	5.4319
Normal	5.7235
Normal	6.09726
Normal	4.74393
Normal	4.57384
Normal	5.24337
Normal	5.6939
Normal	5.97336
Normal	6.05697
Normal	5.40622
Normal	4.45428
Normal	5.60936
Normal	5.06425
Normal	4.32826
Normal	5.76158
Normal	5.35705
Normal	4.93075
Normal	4.78397
Normal	6.38342
Normal	6.38401
Normal	4.32649
Normal	6.6853
Normal	7.57915
Normal	6.51294
Normal	6.26695
Normal	6.34629
Normal	5.65924
Normal	3.24897
Normal	4.91646
Normal	5.52589
Normal	4.75316
Normal	6.42281
Normal	5.58093
Normal	7.05743
Normal	6.5698
Normal	5.87058
Normal	6.49009
Normal	5.66448
Normal	6.22423
Normal	6.16343
Normal	6.03441
Normal	5.57859
Normal	4.86361
Normal	5.67504
Normal	5.85022
Normal	5.8136
Normal	5.2786
Normal	5.34286
Normal	5.61301
Normal	4.80678
Normal	5.63584
Normal	5.74198
Normal	5.71227
Normal	5.58402
Normal	5.27181
Normal	5.63771
Normal	5.31856
Normal	5.1532
Normal	5.82489
Normal	4.47682
Normal	5.31195
Normal	4.78905
Normal	5.62694
Normal	5.03935
Normal	5.33957
Normal	4.94759
Normal	4.82374
Normal	4.83462
Normal	4.89891
Normal	4.97953
Normal	4.85917
Normal	4.75767
Normal	4.65371
Normal	6.08549
Normal	5.44286
Normal	4.95833
Normal	5.23755
Normal	5.25649
Normal	6.46948
Normal	5.06788
Normal	6.37811
Normal	6.42532
Normal	5.20685
Normal	5.77369
Normal	5.54444
Normal	5.19351
Normal	5.14426
Normal	5.45547
Normal	6.90542
Normal	5.39694
Normal	6.63721
Normal	5.19548
Normal	6.84603
Normal	6.19099
Normal	5.96895
Normal	5.49664
Normal	5.86009
Normal	6.13615
Normal	6.21061
Normal	6.10458
Normal	6.47811
Normal	8.20931
Normal	6.53514
Normal	5.46045
Normal	5.93621
Normal	7.13436
Normal	5.06102
Normal	5.33464
Normal	5.34939
Normal	5.20435
Normal	5.70895
Normal	5.1305
Normal	6.65198
Normal	6.02083
Normal	5.84959
Normal	5.97683
Normal	6.34541
Normal	5.95952
Normal	6.26179
Normal	6.28385
Normal	5.46928
Normal	5.28421
Normal	5.79488
Normal	5.97021
Normal	6.67485
Normal	7.10726
Normal	6.08682
Normal	5.01914
Normal	6.62302
Normal	6.80947
Normal	5.80607
Normal	5.67906
Normal	5.77501
Normal	5.9117
Normal	5.7872
Normal	5.62392
Normal	5.03609
Normal	5.75685
Normal	5.3825
Normal	4.60824
Normal	4.70338
Normal	4.9481
Normal	5.50679
Normal	4.55877
Normal	4.80382
Normal	5.36271
Normal	5.80932
Normal	5.53244
Normal	5.10583
Normal	6.02379
Normal	5.46335
Normal	4.90482
Normal	4.67786
Normal	4.98531
Normal	5.39162
Normal	5.66791
Normal	4.67247
Normal	5.81383
Normal	5.21122
Normal	4.95936
Normal	5.40941
Normal	5.17739
Normal	6.56371
Normal	5.51622
Normal	5.66343
Normal	5.12668
Normal	5.39094
Normal	5.2131
Normal	5.24509
Normal	6.41794
Normal	5.06919
Normal	4.48354
Normal	5.48987
Normal	6.22507
Normal	5.09696
Normal	6.20774
Normal	4.34521
Normal	5.37292
Normal	5.02953
Normal	4.98897
Normal	5.58118
Normal	5.52013
Normal	6.27991
Normal	5.28139
Normal	4.94274
Normal	4.723
Normal	4.99055
Normal	6.61634
Normal	4.61949
Normal	5.26227
Normal	4.84821
Normal	5.25395
Normal	5.88672
Normal	4.50871
Normal	4.62142
Normal	5.7402
Normal	4.15688
Normal	5.01393
Normal	5.87025
Normal	6.33318
Normal	5.1921
Normal	5.49354
Normal	6.07158
Normal	4.96297
Normal	4.827
Normal	4.84794
Normal	4.97174
Normal	4.87675
Normal	5.61569
Normal	5.89215
Normal	4.97206
Normal	6.12239
Normal	5.0446
Normal	5.04438
Normal	4.44375
Normal	5.75353
Normal	6.55335
Normal	7.10731
Normal	7.17684
Normal	6.13643
Normal	5.53741
Normal	6.16425
Normal	5.36738
Normal	5.50747
Normal	5.94686
Normal	5.73516
Normal	5.80449
Normal	6.43714
Normal	5.96059
Normal	4.95519
Normal	5.26945
Normal	6.70822
Normal	7.15481
Normal	5.4251
Normal	7.19896
Normal	5.62644
Normal	4.56891
Normal	4.7821
Normal	6.23039
Normal	5.63094
Normal	6.12142
Normal	5.87327
Normal	5.61561
Normal	5.64509
Normal	5.40426
Normal	6.45493
Normal	5.08167
Normal	5.92876
Normal	6.28541
Normal	5.67107
Normal	5.37031
Normal	6.45183
Normal	7.11924
Normal	6.52308
Normal	5.70874
Normal	6.11312
Normal	5.78856
Normal	6.88979
Normal	6.03748
Normal	6.05996
Normal	5.64379
Normal	5.87209
Normal	6.33597
Normal	5.44015
Normal	6.57292
Normal	5.67948
Normal	7.85859
Normal	6.9736
Normal	5.40159
Normal	5.66159
Normal	5.57463
Normal	5.82186
Normal	5.68489
Normal	6.18475
Normal	5.94322
Normal	5.36804
Normal	6.02482
Normal	6.66846
Normal	5.99293
Normal	7.11112
Normal	4.11711
Normal	5.95156
Normal	4.76862
Normal	5.50023
Normal	5.92704
Normal	6.41209
Normal	5.36698
Normal	5.98142
Normal	4.79608
Normal	4.3519
Normal	6.12538
Normal	5.28109
Normal	4.10658
Normal	5.44755
Normal	6.35389
Normal	5.85226
Normal	6.56823
Normal	5.93967
Normal	6.29882
Normal	5.23421
Normal	4.96131
Normal	6.67062
Normal	5.66379
Normal	4.41397
Normal	6.14271
Normal	5.82111
Normal	6.86775
Normal	5.073
Normal	6.23864
Normal	7.00521
Normal	5.77238
Normal	5.53595
Normal	5.61725
Normal	7.36125
Normal	5.17691
Normal	5.43313
Normal	5.08544
Normal	5.57443
Normal	5.69682
Normal	5.7388
Normal	5.57755
Normal	6.06833
Complex	5.30623
Complex	6.83903
Complex	5.46684
Complex	4.97046
Complex	5.59806
Complex	4.68553
Complex	5.7387
Complex	5.01399
Complex	5.14732
Complex	5.52152
Complex	6.06977
Complex	4.86743
Complex	4.67276
Complex	5.64953
Complex	5.5807
Complex	5.24724
Complex	5.14676
Complex	7.15399
Complex	5.72078
Complex	5.13873
Complex	5.6329
Complex	7.40779
Complex	5.01729
Complex	4.97274
Complex	5.07278
Complex	6.16435
Complex	6.36704
Complex	4.86457
Complex	6.10356
Complex	6.09566
Complex	6.71521
Complex	5.11707
Complex	5.71004
Complex	5.66075
Complex	5.11101
Complex	5.42906
Complex	5.58447
Complex	6.44805
Complex	5.09704
Complex	4.79202
Complex	7.60158
Complex	5.27883
Complex	4.48734
Complex	5.67168
Complex	5.12524
Complex	6.73994
Complex	4.94671
Complex	5.03077
Complex	5.34936
Complex	5.7796
Complex	5.81563
Complex	5.96869
Complex	5.33882
Complex	5.08029
Complex	4.35255
Complex	4.13295
Complex	5.35415
Complex	6.43005
Complex	7.31213
Complex	4.68553
Complex	6.3773
Complex	4.94845
Complex	5.47557
Complex	5.09287
Complex	5.98484
Complex	6.50682
Complex	5.65313
Complex	3.24286
Complex	5.88431
Complex	5.52411
Complex	5.784
Complex	4.78362
Complex	4.95087
Complex	6.40151
Complex	5.23281
Complex	5.63217
Complex	5.42001
Complex	6.753
Complex	6.05697
Complex	6.14353
Complex	5.02454
Complex	6.17123
Complex	7.07683
Complex	5.18529
Complex	5.7486
Complex	6.47238
Complex	8.01715
inv(16)	5.70784
inv(16)	6.9923
inv(16)	4.91176
inv(16)	5.78745
inv(16)	4.71675
inv(16)	5.57727
inv(16)	5.59
inv(16)	5.07532
inv(16)	5.2594
inv(16)	6.43047
inv(16)	5.09844
inv(16)	6.39243
inv(16)	7.2063
inv(16)	5.76246
inv(16)	5.65087
inv(16)	5.10858
inv(16)	5.94276
inv(16)	5.97235
inv(16)	5.4472
inv(16)	5.41752
inv(16)	5.61491
inv(16)	5.44718
inv(16)	5.0715
inv(16)	5.01336
inv(16)	5.83448
inv(16)	5.66431
inv(16)	5.49335
inv(16)	5.1999
inv(16)	4.93554
inv(16)	5.62633
inv(16)	5.24117
inv(16)	5.34988
inv(16)	4.92359
inv(16)	6.37685
inv(16)	6.33913
inv(16)	5.51873
inv(16)	5.38524
inv(16)	4.47027
inv(16)	5.35456
inv(16)	5.60053
inv(16)	5.71559
inv(16)	5.51229
inv(16)	5.47387
inv(16)	5.28134
inv(16)	5.08722
inv(16)	4.99869
inv(16)	5.24995
inv(16)	4.57358
inv(16)	5.20692
inv(16)	5.57599
inv(16)	4.93701
inv(16)	4.84565
inv(16)	6.12289
inv(16)	5.24547
inv(16)	5.32342
inv(16)	6.79071
inv(16)	5.06863
inv(16)	4.9037
inv(16)	5.75837
inv(16)	5.52821
inv(16)	5.98735
inv(16)	6.01746
inv(16)	5.45971
inv(16)	5.00314
inv(16)	6.6122
inv(16)	5.94856
inv(16)	5.87562
inv(16)	5.70074
inv(16)	6.04702
inv(16)	6.39601
inv(16)	5.60375
inv(16)	4.95905
inv(16)	5.17391
inv(16)	6.15363
inv(16)	5.31535
inv(16)	6.16601
inv(16)	5.86957
t(15;17)	5.84777
t(15;17)	5.0605
t(15;17)	5.7731
t(15;17)	6.21639
t(15;17)	7.37356
t(15;17)	6.94494
t(15;17)	5.95037
t(15;17)	5.45868
t(15;17)	7.01285
t(15;17)	5.91764
t(15;17)	7.30258
t(15;17)	6.91186
t(15;17)	5.2762
t(15;17)	5.90692
t(15;17)	7.54062
t(15;17)	6.27156
t(15;17)	6.16819
t(15;17)	5.65696
t(15;17)	6.05678
t(15;17)	6.02961
t(15;17)	6.72498
t(15;17)	7.1093
t(15;17)	5.96576
t(15;17)	6.15843
t(15;17)	5.09582
t(15;17)	5.93961
t(15;17)	7.70676
t(15;17)	6.10012
t(15;17)	5.46933
t(15;17)	5.74197
t(15;17)	7.13674
t(15;17)	7.12529
t(15;17)	5.06132
t(15;17)	5.22522
t(15;17)	5.54215
t(15;17)	6.72953
t(15;17)	6.36474
t(15;17)	6.6495
t(15;17)	7.39928
t(15;17)	6.34553
t(15;17)	5.57918
t(15;17)	6.44613
t(15;17)	6.4036
t(15;17)	7.41648
t(15;17)	7.36331
t(15;17)	6.73036
t(15;17)	7.62421
t(15;17)	6.46787
t(15;17)	7.1025
t(15;17)	6.61487
t(15;17)	5.91564
t(15;17)	6.00742
t(15;17)	5.77812
t(15;17)	5.64969
t(15;17)	5.65525
t(15;17)	5.11585
t(15;17)	5.83403
t(15;17)	6.03131
t(15;17)	7.57713
t(15;17)	6.08906
t(15;17)	5.94418
t(15;17)	6.27368
t(15;17)	7.00571
t(15;17)	5.82566
t(15;17)	6.0161
t(15;17)	6.13255
t(15;17)	5.4815
t(15;17)	6.6748
t(15;17)	5.68317
t(15;17)	5.96005
t(15;17)	6.44564
t(15;17)	6.40774
t(15;17)	6.57146
t(15;17)	7.48421
t(15;17)	7.06442
t(15;17)	7.01887
t(15;17)	5.02163
t(15;17)	6.95379
t(15;17)	5.47471
t(15;17)	6.54798
t(15;17)	6.01992
t(15;17)	6.09911
t(15;17)	5.78068
t(15;17)	5.59694
t(15;17)	6.26733
t(15;17)	6.9634
t(15;17)	7.71081
t(8;21)	7.99797
t(8;21)	5.56999
t(8;21)	4.70375
t(8;21)	5.84465
t(8;21)	8.07178
t(8;21)	5.58874
t(8;21)	5.46079
t(8;21)	6.60304
t(8;21)	6.8036
t(8;21)	6.12039
t(8;21)	7.59486
t(8;21)	5.44958
t(8;21)	6.77086
t(8;21)	5.92328
t(8;21)	5.82365
t(8;21)	5.21217
t(8;21)	6.07191
t(8;21)	7.01661
t(8;21)	6.74477
t(8;21)	7.16406
t(8;21)	5.80559
t(8;21)	5.77293
t(8;21)	5.45385
t(8;21)	5.10198
t(8;21)	5.38589
t(8;21)	5.92914
t(8;21)	5.40073
t(8;21)	5.989
t(8;21)	5.43309
t(8;21)	5.65879
t(8;21)	5.43728
t(8;21)	6.076
t(8;21)	5.39748
t(8;21)	6.31664
t(8;21)	5.45545
t(8;21)	6.38357
t(8;21)	5.41442
t(8;21)	5.8263
t(8;21)	6.619
t(8;21)	5.28163
t(8;21)	5.21594
t(8;21)	5.83993
t(8;21)	5.80627
t(8;21)	6.71673
t(8;21)	6.55609
t(8;21)	5.1737
t(8;21)	4.47033
t(8;21)	5.60714
t(8;21)	5.72553
t(8;21)	6.5899
t(8;21)	4.94465
t(8;21)	5.64899
t(8;21)	5.25161
t(8;21)	5.44309
t(8;21)	5.21313
t(8;21)	5.25373
t(8;21)	5.67434
t(8;21)	5.68345
t(8;21)	6.43794
t(8;21)	7.21044
t(8;21)	7.17847
t(8;21)	7.0589
t(8;21)	5.61774
t(8;21)	5.79679
t(8;21)	5.80153
t(8;21)	5.00045
t(8;21)	6.02975
t(8;21)	4.83532
t(8;21)	5.24853
t(8;21)	6.16339
t(8;21)	5.25213
t(8;21)	6.75771
t(8;21)	5.02963
t(8;21)	5.17617
t(8;21)	6.66472
t(8;21)	5.43514
t(8;21)	4.68
t(8;21)	5.49542
t(8;21)	6.0054
t(8;21)	5.20664
t(8;21)	5.33261
t(8;21)	6.71501
t(8;21)	5.65795
t(8;21)	6.56141
t(8;21)	6.4363
t(8;21)	5.4355
t(8;21)	5.58458
t(8;21)	6.12349
t(8;21)	5.68401
t(8;21)	5.39213
t(8;21)	5.81533
t(8;21)	5.49224
t(8;21)	6.45445
t(8;21)	6.03408
t(8;21)	6.82091
t(8;21)	5.26132
t(8;21)	5.23326
t(8;21)	5.56483
t(11q23)/MLL	6.90918
t(11q23)/MLL	5.60586
t(11q23)/MLL	5.85304
t(11q23)/MLL	5.73709
t(11q23)/MLL	6.44544
t(11q23)/MLL	6.21547
t(11q23)/MLL	6.62456
t(11q23)/MLL	6.23695
t(11q23)/MLL	5.02531
t(11q23)/MLL	5.74606
t(11q23)/MLL	5.26308
t(11q23)/MLL	5.29475
t(11q23)/MLL	8.61826
t(11q23)/MLL	5.53356
t(11q23)/MLL	5.43707
t(11q23)/MLL	5.45012
t(11q23)/MLL	4.50174
t(11q23)/MLL	5.48387
t(11q23)/MLL	5.20043
t(11q23)/MLL	4.89559
t(11q23)/MLL	6.68601
t(11q23)/MLL	7.0419
t(11q23)/MLL	6.58991
t(11q23)/MLL	5.21478
t(11q23)/MLL	5.5767
t(11q23)/MLL	5.31664
t(11q23)/MLL	5.6337
t(11q23)/MLL	6.09664
t(11q23)/MLL	5.29479
t(11q23)/MLL	5.40194
t(11q23)/MLL	4.76218
t(11q23)/MLL	4.99057
t(11q23)/MLL	4.5729
t(11q23)/MLL	5.59077
t(11q23)/MLL	7.54894
t(11q23)/MLL	6.64013
t(11q23)/MLL	5.43645
t(11q23)/MLL	5.73547
t(11q23)/MLL	5.53177
t(11q23)/MLL	5.11814
t(11q23)/MLL	5.08002
t(11q23)/MLL	5.7903
t(11q23)/MLL	5.34911
t(11q23)/MLL	5.39774
t(11q23)/MLL	5.56817
t(11q23)/MLL	6.35474
t(11q23)/MLL	5.45902
t(11q23)/MLL	6.80436
t(11q23)/MLL	4.80345
t(11q23)/MLL	5.45336
t(11q23)/MLL	6.56733
t(11q23)/MLL	5.32721
t(11q23)/MLL	5.55728
t(11q23)/MLL	6.74343
t(11q23)/MLL	5.22039
t(11q23)/MLL	4.78738
t(11q23)/MLL	6.0465
t(11q23)/MLL	5.07331
nan	4.23051
nan	6.38494
nan	4.99258
nan	5.229
nan	5.40021
nan	5.52059
nan	4.48955
nan	5.36618
nan	4.95505
nan	5.57876
nan	5.36027
nan	5.69509
nan	5.96586
nan	4.867
nan	4.22182
nan	5.97702
nan	4.48653
nan	6.75116
nan	4.1358
nan	5.76141
nan	5.20833
nan	5.17436
nan	4.87352
nan	5.33944
nan	5.39756
nan	5.69787
nan	5.51944
nan	5.98123
nan	5.09859
nan	5.34509
nan	5.57104
nan	5.06758
nan	5.50007
nan	5.1644
nan	5.58997
nan	6.53836
nan	6.44523
nan	5.9187
nan	7.04916
nan	6.28418
nan	5.25646
nan	5.61001
nan	5.5276
nan	5.38184
nan	5.30731
nan	5.63635
nan	5.77574
nan	8.03243
nan	7.39443
nan	5.28829
nan	7.45068
nan	6.07713
nan	5.63211
nan	5.59542
nan	5.85838
nan	5.48629
nan	5.73197
nan	4.50669
nan	6.67137
nan	6.10255
nan	5.3683
nan	5.10763
nan	5.37582
nan	5.24043
nan	5.76601
nan	5.68679
nan	5.54539
nan	4.91018
nan	5.61034
nan	5.29889
nan	5.2821
nan	4.58306
nan	5.23223
nan	6.09567
nan	5.36111
nan	6.08775
nan	6.76289
nan	4.75235
nan	5.93387
nan	6.27986
nan	5.64967
nan	7.69445
nan	6.3805
nan	6.61334
nan	4.9175
nan	5.91621
nan	5.27047
nan	5.79655
nan	6.68846
nan	5.92541
nan	6.48279
nan	6.03013
nan	6.94443
nan	5.65408
nan	6.11161
nan	5.44759
nan	5.04716
nan	5.62457
nan	5.45104
nan	6.07204
nan	6.02445
nan	5.62697
nan	5.988
nan	4.27467
nan	5.35399
nan	6.32351
nan	5.65815
nan	6.31358
nan	4.82245
nan	5.48959
nan	6.31061
nan	5.08064
nan	5.80519
nan	5.45535
nan	5.93838
nan	5.93924
nan	5.29631
nan	6.87827
Trisomy 8	5.39653
Trisomy 8	4.18976
Trisomy 8	6.30495
Trisomy 8	5.85686
Trisomy 8	5.25312
Trisomy 8	5.1907
Trisomy 8	5.06909
Trisomy 8	5.59205
Trisomy 8	4.34135
Trisomy 8	4.31096
Trisomy 8	5.74427
Trisomy 8	6.41885
Trisomy 8	6.36611
Trisomy 8	5.46438
Trisomy 8	5.08167
Trisomy 8	6.24964
Trisomy 8	3.23167
Trisomy 8	5.7728
Trisomy 8	4.77243
Trisomy 8	5.85327
Trisomy 8	4.60957
Trisomy 8	5.14512
Trisomy 8	5.44704
Trisomy 8	5.94402
Trisomy 8	5.29269
Trisomy 8	6.30737
Trisomy 8	4.82504
Trisomy 8	5.01796
Trisomy 8	5.5593
Trisomy 8	4.8529
Trisomy 8	8.56657
Trisomy 8	6.21352
del(5q)	5.52115
del(5q)	5.3231
del(5q)	4.33683
del(5q)	4.11723
del(5q)	5.33843
del(5q)	6.41433
del(5q)	4.66981
del(5q)	4.93273
del(5q)	5.07715
del(5q)	5.96912
del(5q)	4.83504
del(5q)	5.86859
del(5q)	4.89463
del(5q)	5.50839
del(5q)	4.7679
del(5q)	6.66734
del(5q)	6.61811
del(5q)	5.9405
del(5q)	6.16888
del(5q)	5.43131
del(5q)	4.98692
del(7q)/7q-	4.684
del(7q)/7q-	4.71866
del(7q)/7q-	4.42368
del(7q)/7q-	5.34635
del(7q)/7q-	4.29879
del(7q)/7q-	5.00437
del(7q)/7q-	4.07919
del(7q)/7q-	5.30039
del(7q)/7q-	4.63177
del(7q)/7q-	4.7241
del(7q)/7q-	4.89469
del(7q)/7q-	4.26662
del(7q)/7q-	5.59937
del(7q)/7q-	3.1891
del(7q)/7q-	4.79699
del(7q)/7q-	4.85659
del(7q)/7q-	5.73023
del(7q)/7q-	4.72986
del(7q)/7q-	5.52106
del(7q)/7q-	5.81071
t(9;11)	4.23982
t(9;11)	4.6665
Other	5.11765
Other	5.40652
Other	5.88022
Other	6.149
Other	4.86164
Other	5.77862
Other	5.62123
Other	5.10069
Other	5.7552
Other	4.54417
Other	4.85318
Other	5.09643
Other	5.66213
Other	5.73355
Other	5.36865
Other	4.63004
Other	5.85112
Other	6.70396
Other	4.76863
Other	5.60638
Other	5.56382
Other	5.9063
Other	5.38065
Other	5.63826
Other	6.09935
Other	5.94522
Other	5.84314
Other	4.82607
Other	4.31599
Other	6.17834
Other	6.69441
Other	5.03671
Other	5.0575
Other	5.99772
Other	6.06024
Other	4.73204
Other	6.1687
Other	5.79587
Other	5.2468
Other	4.7343
Other	6.39632
Other	3.88463
Other	4.95083
Other	5.22847
Other	5.4537
Other	4.38914
Other	5.26469
Other	6.06688
Other	5.25562
Other	4.13606
Other	4.80967
Other	5.30671
Other	4.95023
Other	6.4609
Other	6.36067
Other	6.66877
Other	5.2562
Other	5.27274
Other	5.76241
Other	6.06073
Other	5.79395
Other	4.72109
Other	5.67632
Other	6.52382
Other	5.06606
Other	5.53011
Other	5.61201
Other	5.34242
Other	6.99665
Other	5.67598
Other	5.6359
Other	5.58801
Other	6.28324
Other	6.21796
Other	6.32353
Other	5.86363
Other	6.91508
Other	6.34743
Other	5.57163
Other	8.00787
Other	5.61682
Other	5.95338
Other	5.82674
Other	4.83212
Other	4.82227
Other	7.21837
Other	6.08288
Other	6.52958
Other	5.21104
Other	6.2959
Other	6.35928
7	5.70113
7	5.14368
7	4.89072
7	4.6577
7	5.35378
7	5.39453
7	5.4568
7	6.28513
Complex_ del(5q)	5.07239
Complex_ del(5q)	5.88323
Complex_ del(5q)	5.63571
Complex_ del(5q)	5.06476
Complex_ del(5q)	5.60052
Complex_ del(5q)	5.22276
Complex_ del(5q)	5.92558
Complex_ del(5q)	5.07435
Complex_ del(5q)	5.7389
Complex_ del(5q)	6.19402
Complex_ del(5q)	6.27154
Complex_ del(5q)	6.07363
Complex_ del(5q)	5.32914
Complex_ del(5q)	5.372
Complex_ del(5q)	7.70902
Complex_ del(5q)	5.27708
Complex_ del(5q)	4.82367
Complex_ del(5q)	5.25368
Complex_ del(5q)	5.25562
Complex_ del(5q)	4.9878
Complex_ del(5q)	4.94877
Complex_ del(5q)	6.589
Complex_ del(5q)	7.69061
Complex_ del(5q)	5.65274
Complex_ del(5q)	5.98207
Complex_ del(5q)	7.09298
Complex_ del(5q)	5.52502
Complex_ del(5q)	6.47656
Complex_ del(5q)	5.29654
Complex_ del(5q)	5.3619
Complex_ del(5q)	6.04419
Complex_ del(5q)	5.9809
Complex_ del(5q)	5.47489
Complex_ del(5q)	5.79812
Complex_ del(5q)	5.37196
Complex_ del(5q)	6.87297
Complex_ del(5q)	5.12576
Complex_ del(5q)	5.10132
Complex_ del(5q)	5.79802
Complex_ del(5q)	5.97489
Complex_ untypical	5.34578
Complex_ untypical	5.35301
Complex_ untypical	5.0299
Complex_ untypical	6.22669
Complex_ untypical	6.50441
Complex_ untypical	4.51331
Complex_ untypical	8.63825
Complex_ untypical	5.14995
Complex_ untypical	5.46119
Complex_ untypical	5.18389
Complex_ untypical	5.99786
inv(3)	5.24478
inv(3)	5.1441
inv(3)	5.39763
trisomy 11	5.30361
trisomy 13	4.81914
trisomy 13	4.9204
trisomy 13	5.13542
trisomy 13	5.76425
trisomy 13	6.95249
trisomy 13	6.46247
trisomy 13	4.78608
trisomy 13	5.5133
trisomy 13	5.14873
trisomy 13	5.75837
t(6;9)	5.80276
t(6;9)	6.11448
t(6;9)	5.57547
t(6;9)	5.72832
t(6;9)	4.86497
t(6;9)	5.05811
t(6;9)	4.87053
t(6;9)	6.43431
t(6;9)	6.556
t(8;16)	5.5475
t(8;16)	6.6221
t(8;16)	5.47671
del(9q)	5.40636
t(1;3)	5.76724
-5/7(q)	5.01188
-5/7(q)	4.81271
-5/7(q)	5.25097
-5/7(q)	4.85372
-5/7(q)	6.34522
-5/7(q)	4.58007
-5/7(q)	4.79188
-5/7(q)	5.14829
-5/7(q)	4.71067
-5/7(q)	5.10885
-5/7(q)	5.1958
-5/7(q)	4.75074
-5/7(q)	5.4855
-5/7(q)	5.63876
-5/7(q)	5.51982
-5/7(q)	6.46315
-5/7(q)	6.11339
-5/7(q)	6.4352
-5/7(q)	6.03138
-5/7(q)	4.72498
-5/7(q)	5.29589
-5/7(q)	4.97551
-5/7(q)	4.90298
-5/7(q)	4.56539
-5/7(q)	5.91976
-5/7(q)	4.74247
-5/7(q)	5.6589
-5/7(q)	5.41249
-9q	6.24451
-9q	6.10311
-9q	5.90625
-9q	6.58216
-9q	4.88482
-9q	5.07681
8	5.14813
8	4.44415
8	5.89943
8	5.58035
8	4.7295
8	5.71474
8	6.26827
8	5.97034
8	5.02749
8	5.42741
8	5.54745
8	5.50719
8	6.25438
8	5.16665
8	6.70775
8	5.64236
8	5.05848
8	4.5158
8	5.57372
8	5.7286
t(9;22)	4.99793
t(9;22)	6.06887
abn(3q)	5.2163
abn(3q)	5.39033
